# Supplementary material for: Palladium-catalyzed annulation reactions of methyl o-halobenzoates with azabicyclic alkenes: a general protocol for the construction of benzo[c]phenanthridine derivatives
Source: Royal Society of Chemistry journal article supplement (doi:10.1039/c3ra42474j), 2013-01-01

## Supporting information

### **Palladium-catalyzed annulation reactions of methyl *o*-halobenzoates with azabicyclic alkenes: a general protocol for the construction of benzo[*c*]phenanthridine derivatives**

Cui Guo, Kanglun Huang, Bo Wang, Longguan Xie and Xiaohua Xu \*

*State Key Laboratory of Elemento-Organic Chemistry, Nankai University, Tianjin  
300071, China.*

*Email: xiaohuaxu@nankai.edu.cn*

*Fax: +86 22 23502737*

#### **Contents:**

|                                                          |               |
|----------------------------------------------------------|---------------|
| <b><sup>1</sup>H and <sup>13</sup>C NMR Spectra.....</b> | <b>S2-S47</b> |
|----------------------------------------------------------|---------------|

Copies of <sup>1</sup>H and <sup>13</sup>C Spectra

1a

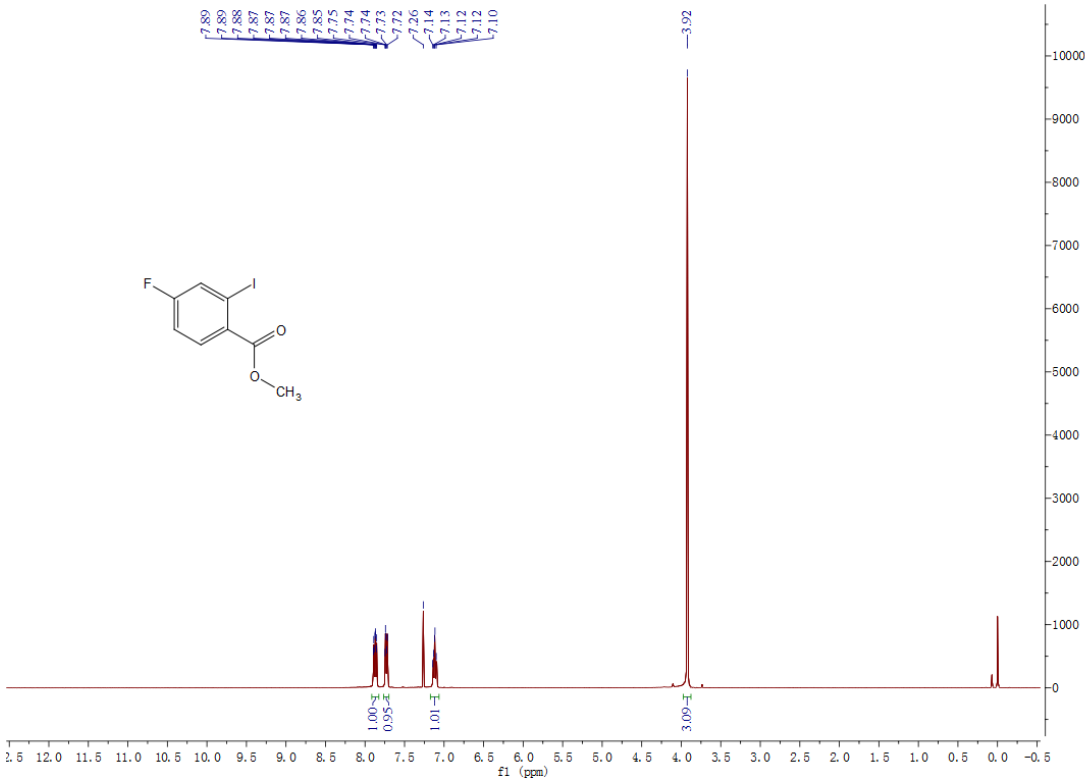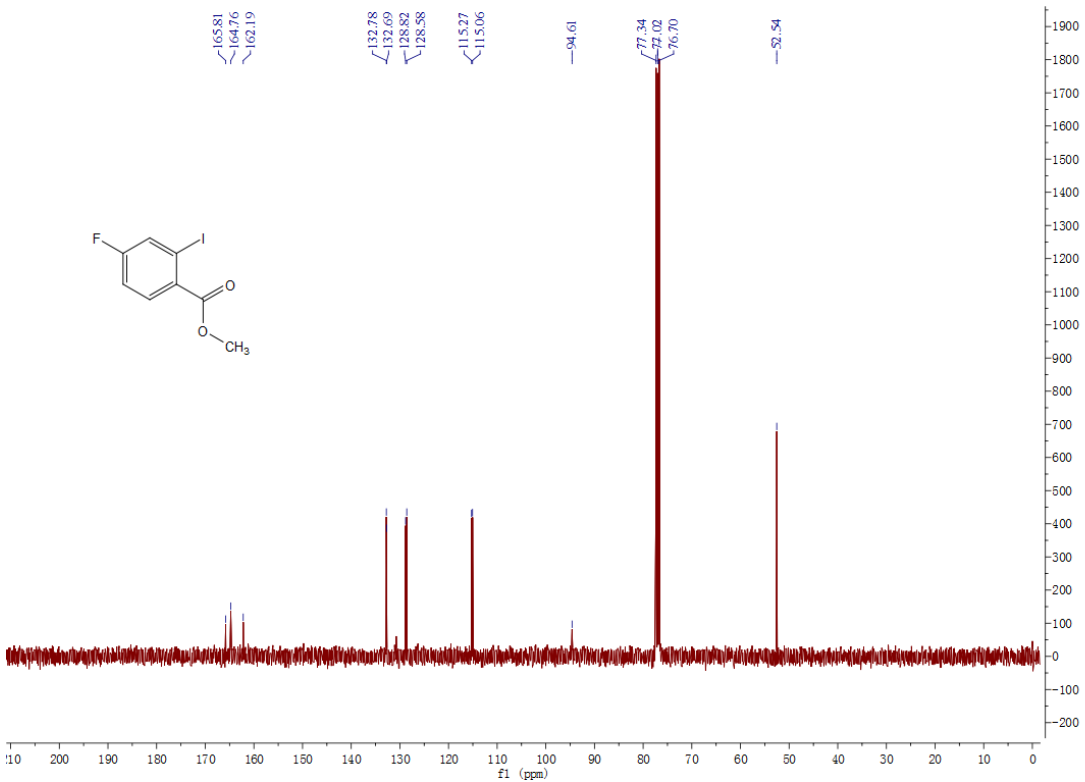

**1b**

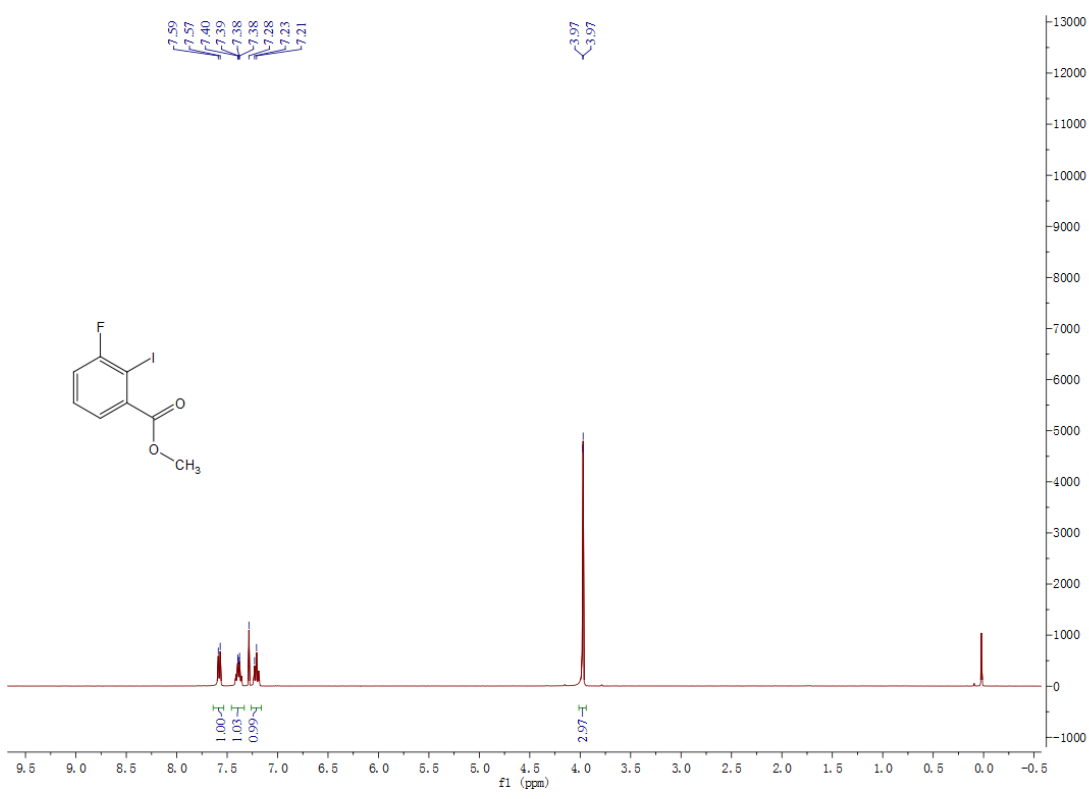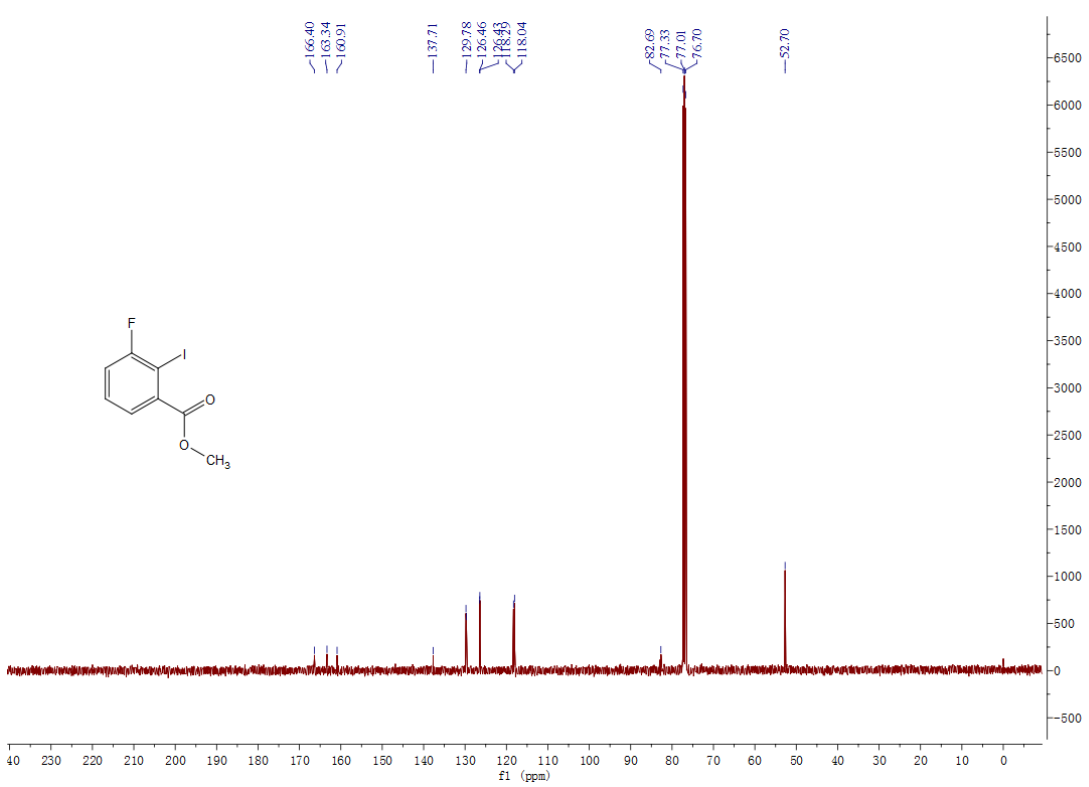

**1c**

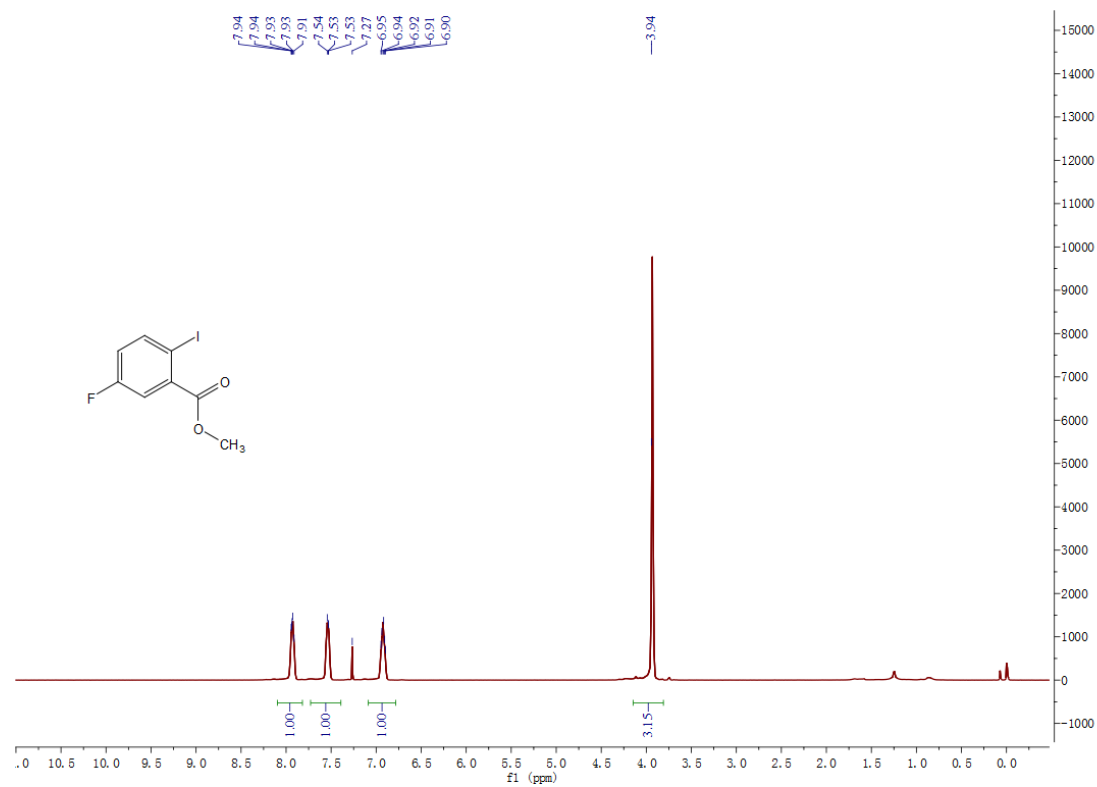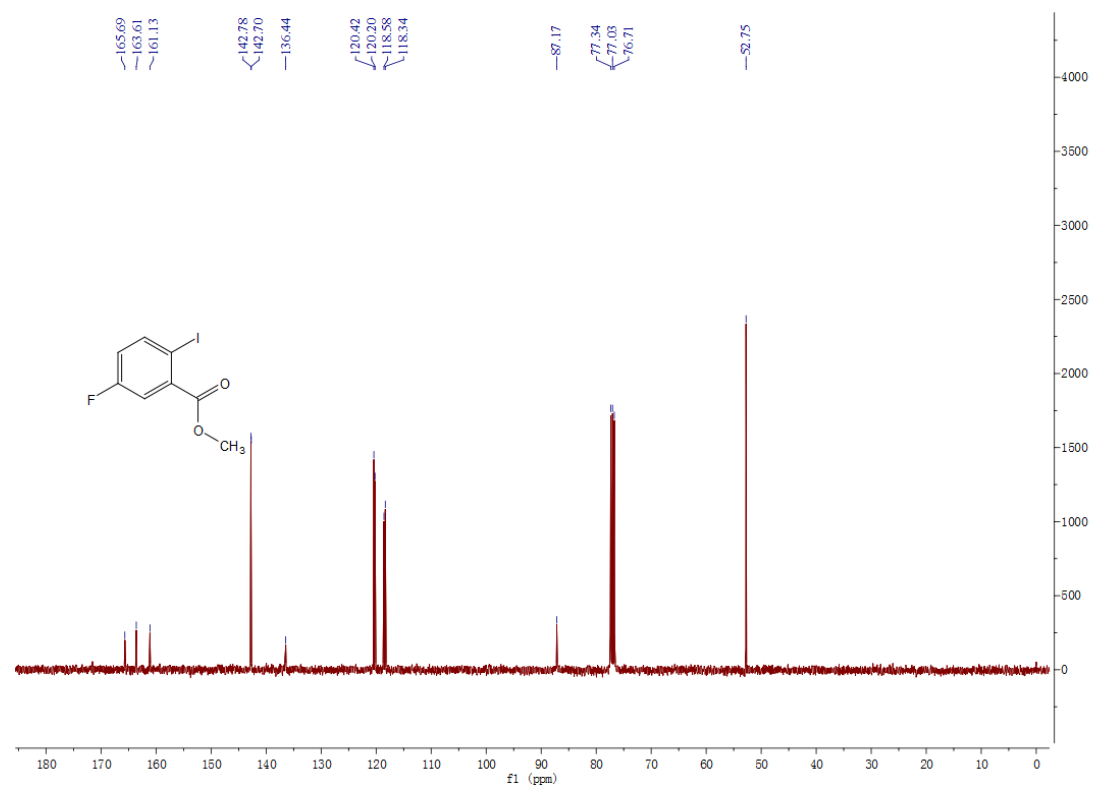

1d

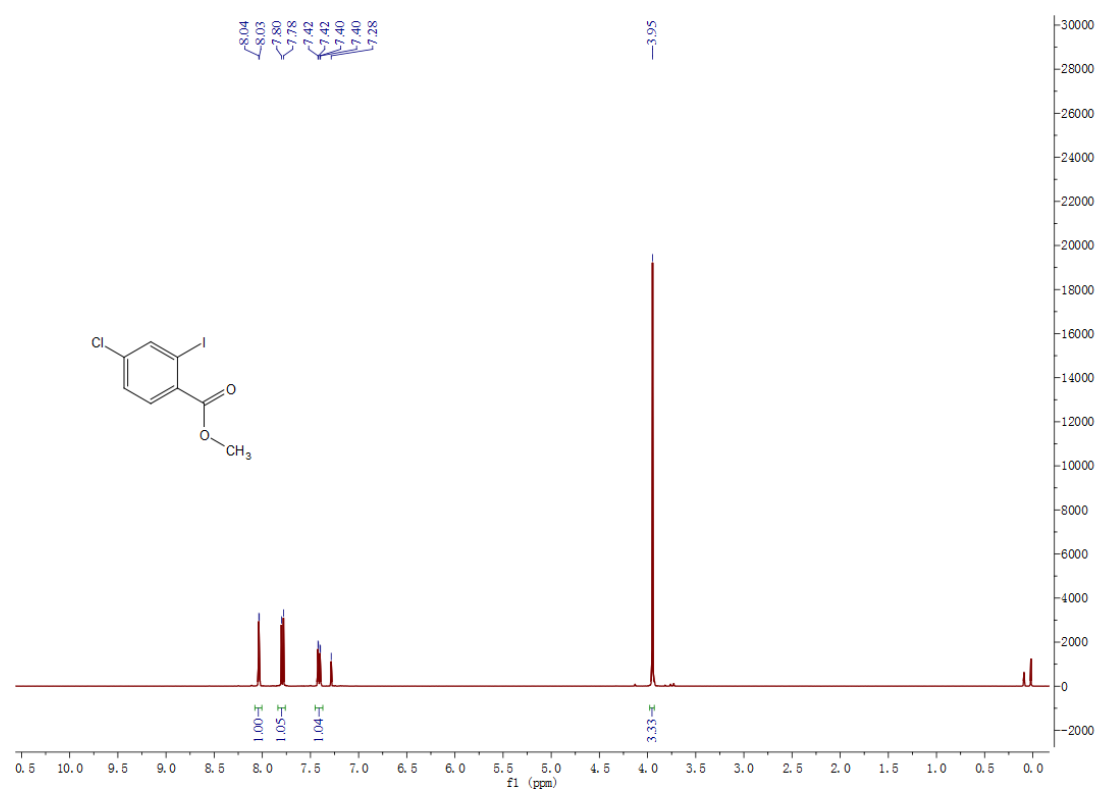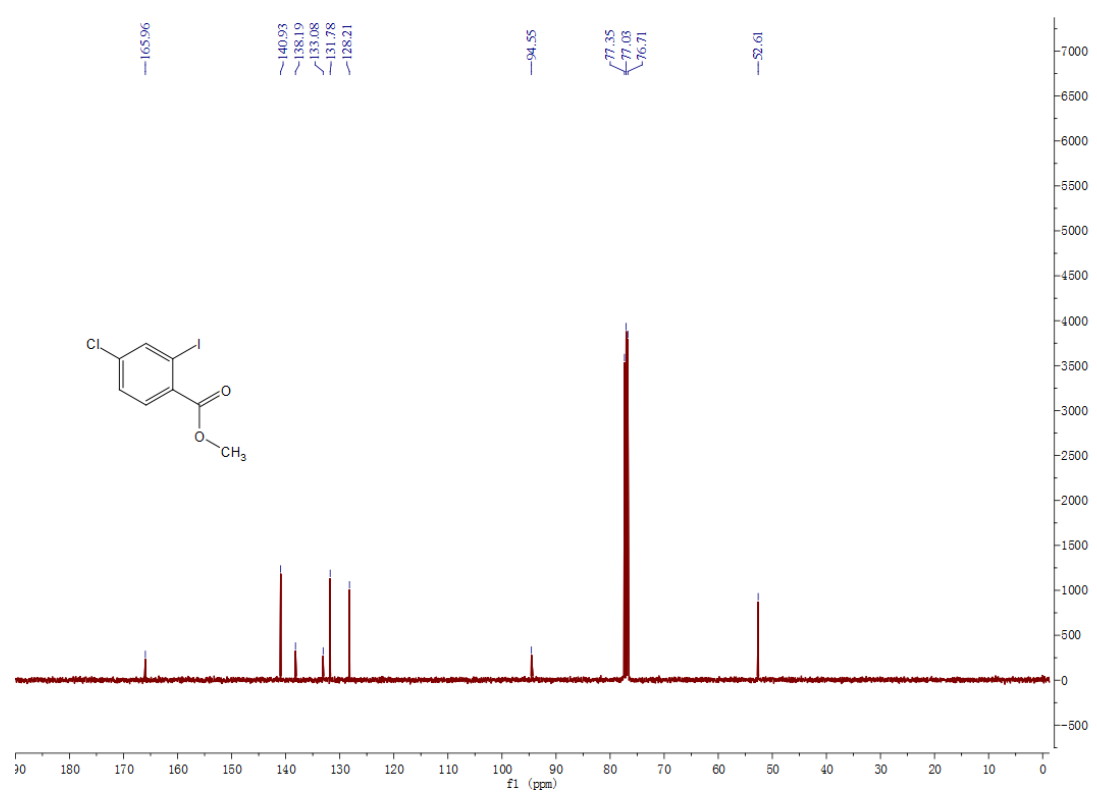

**1e**

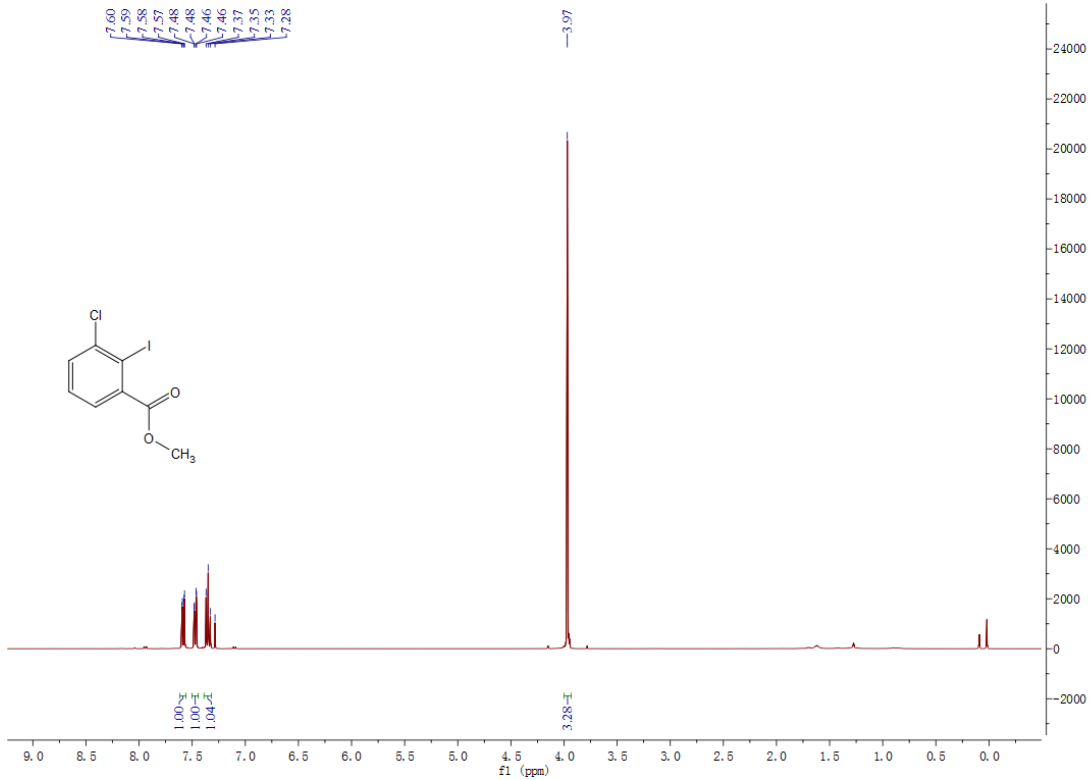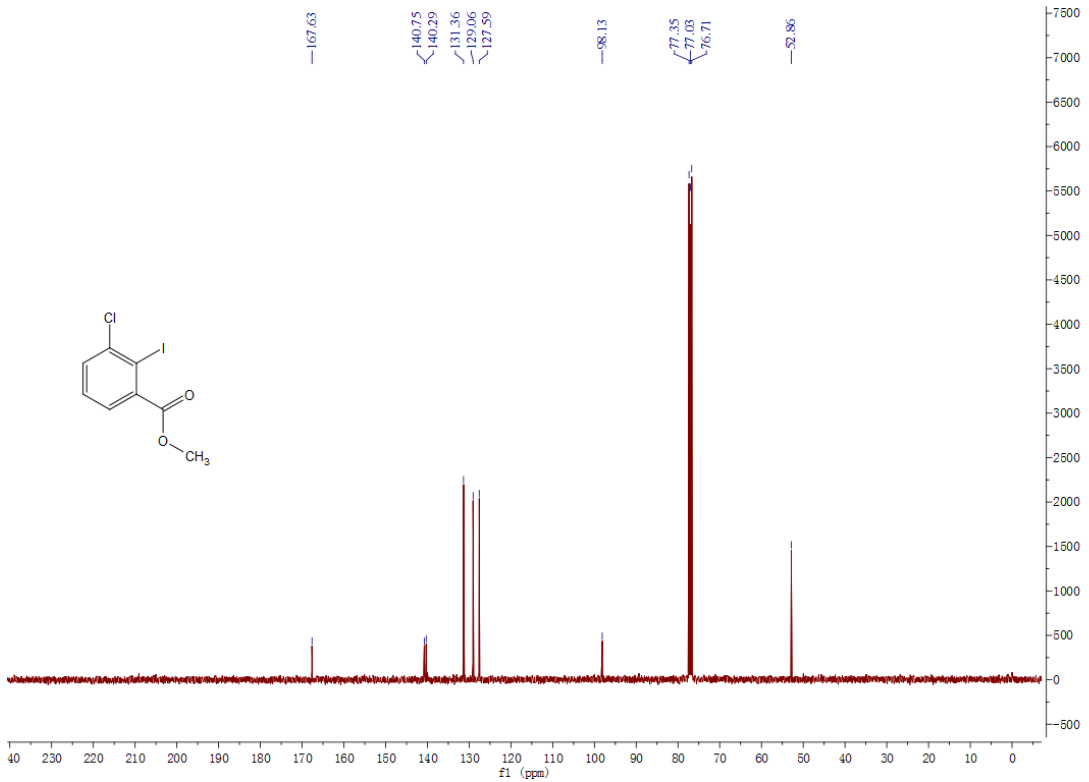

**1f**

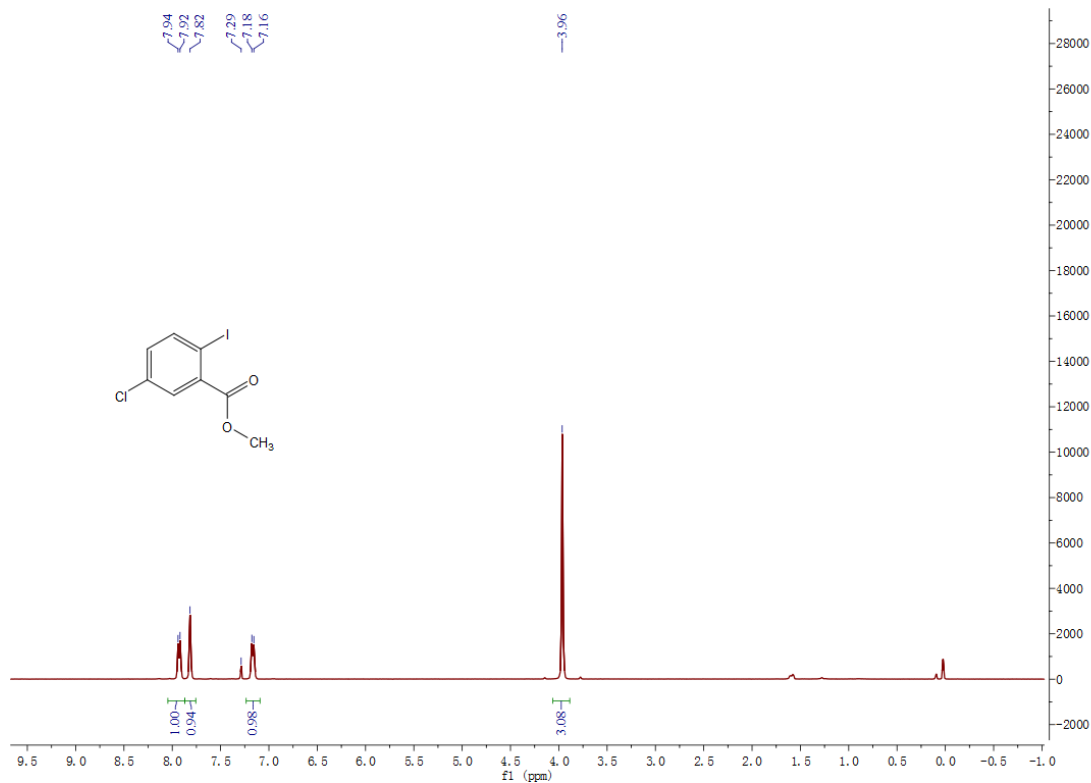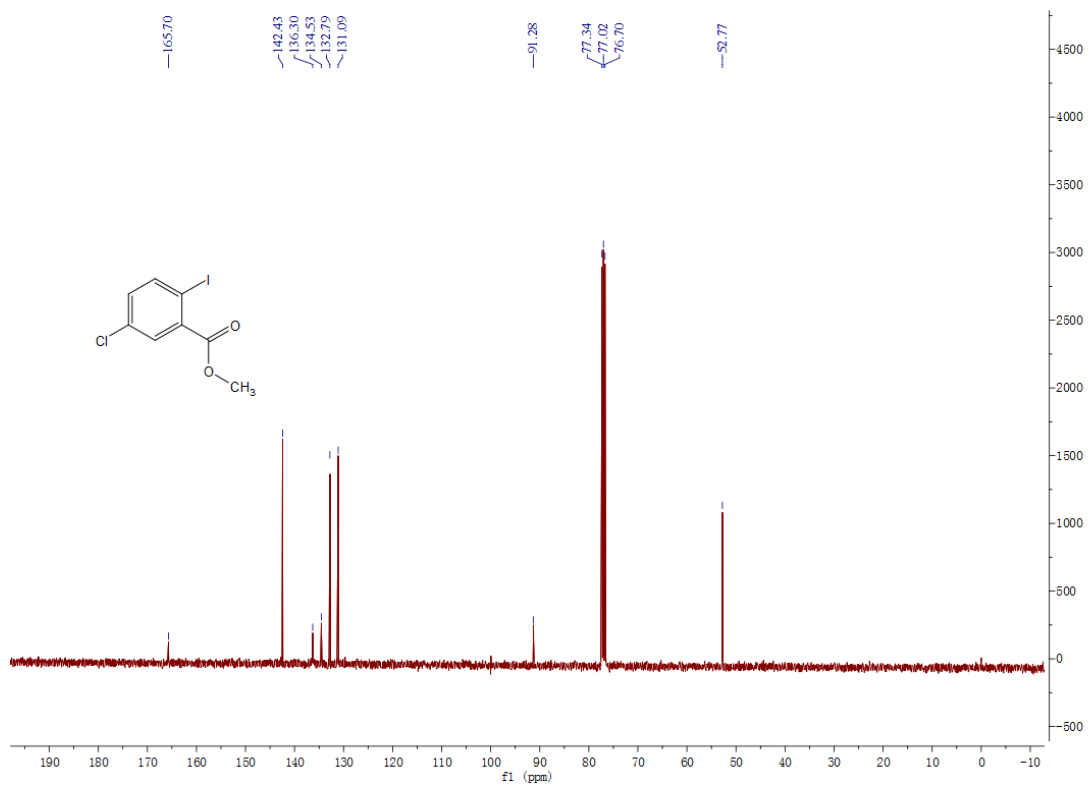

**1g**

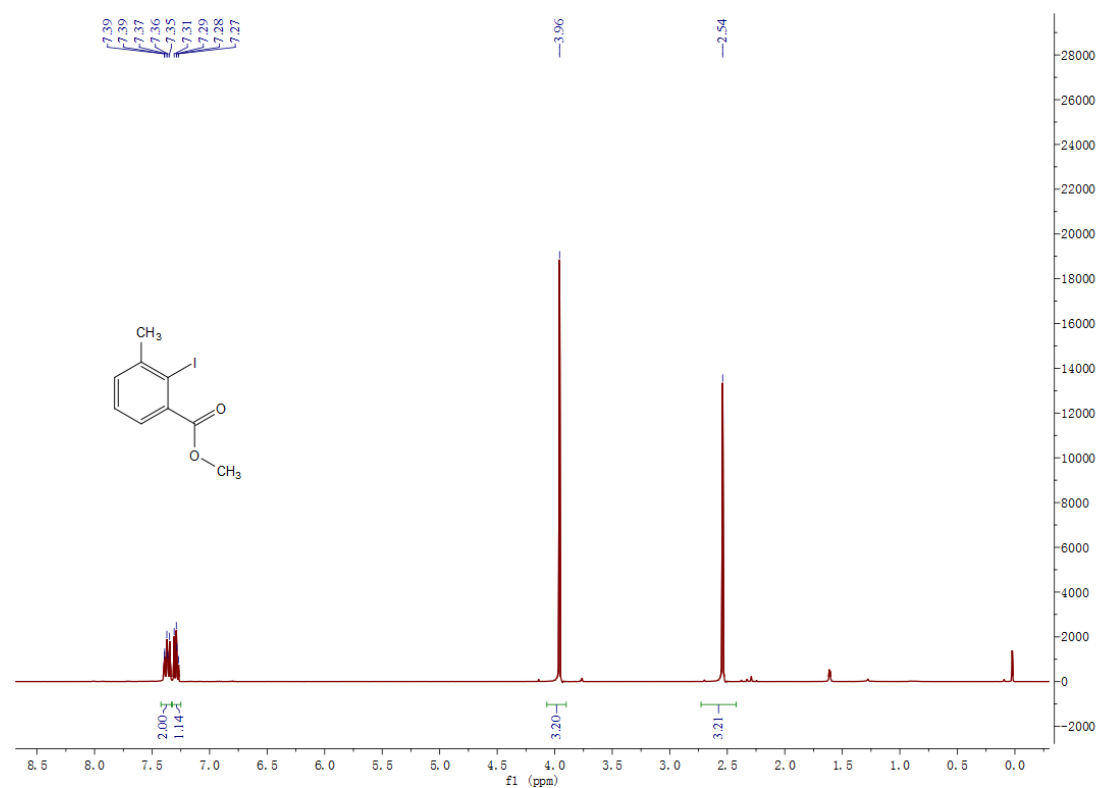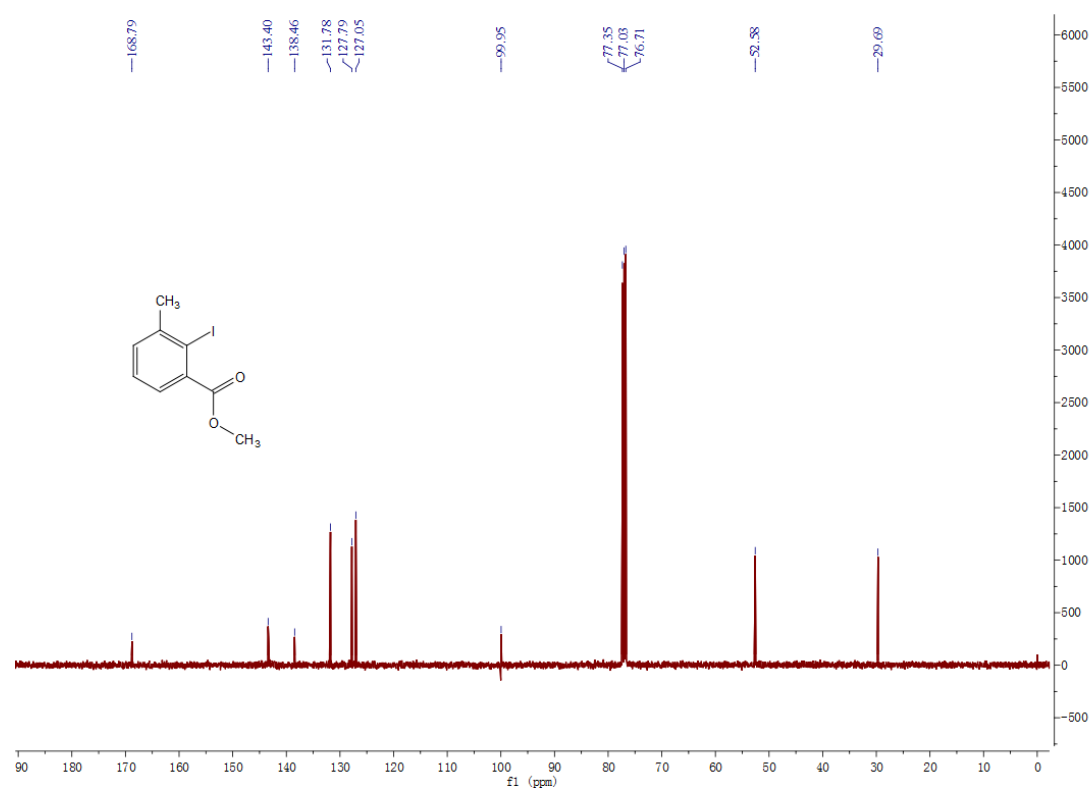



1h

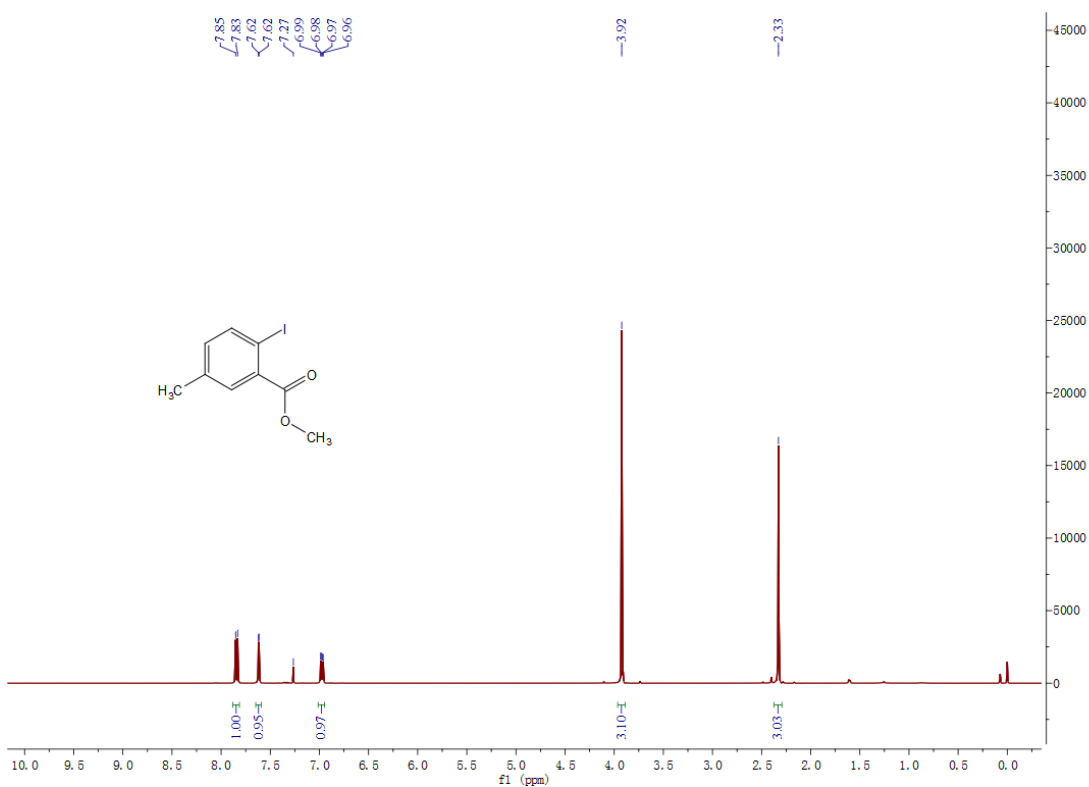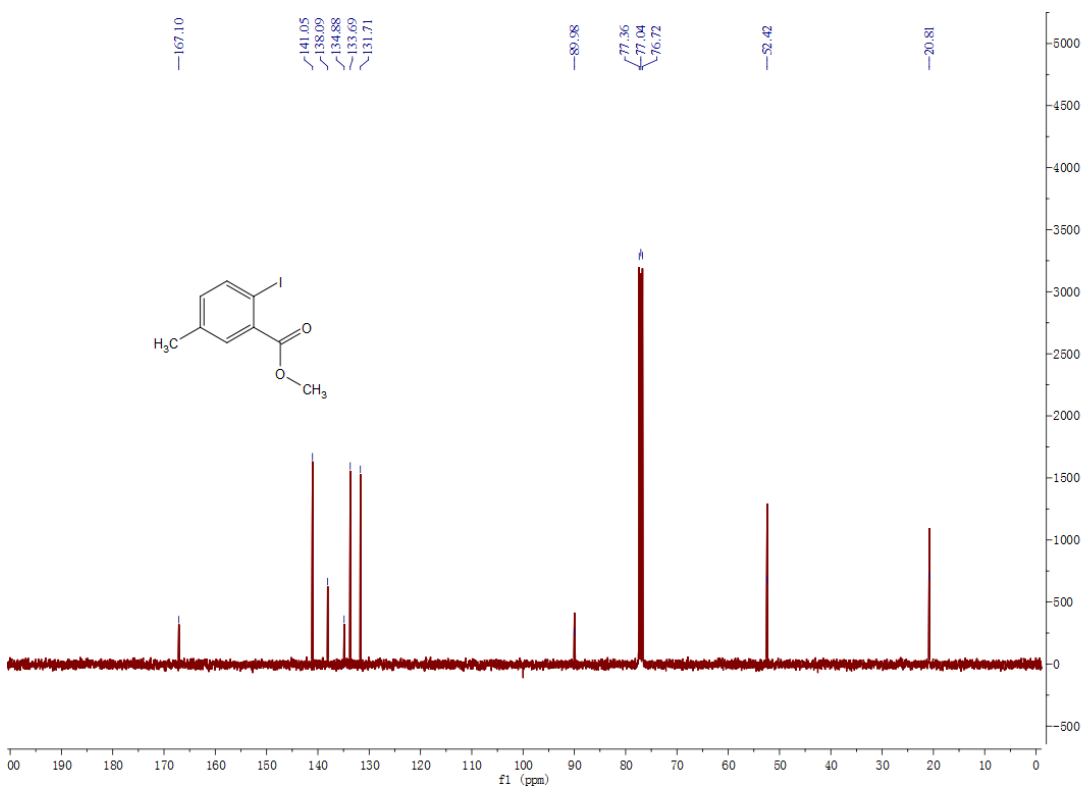

1i

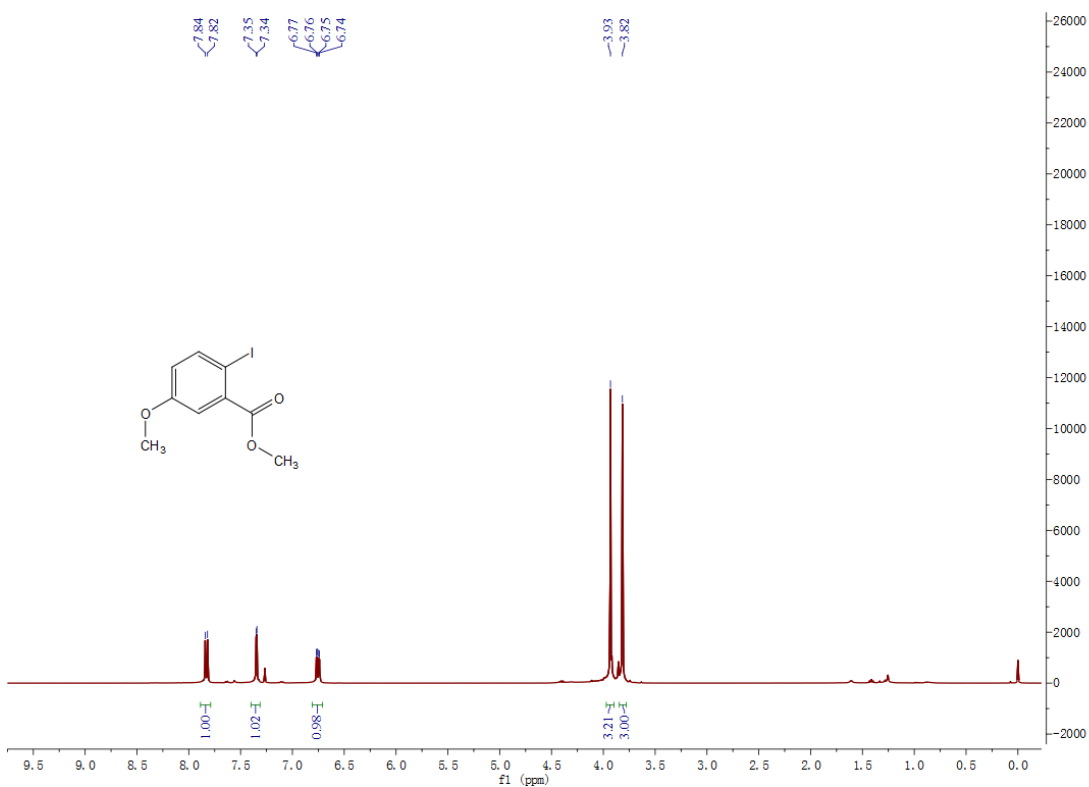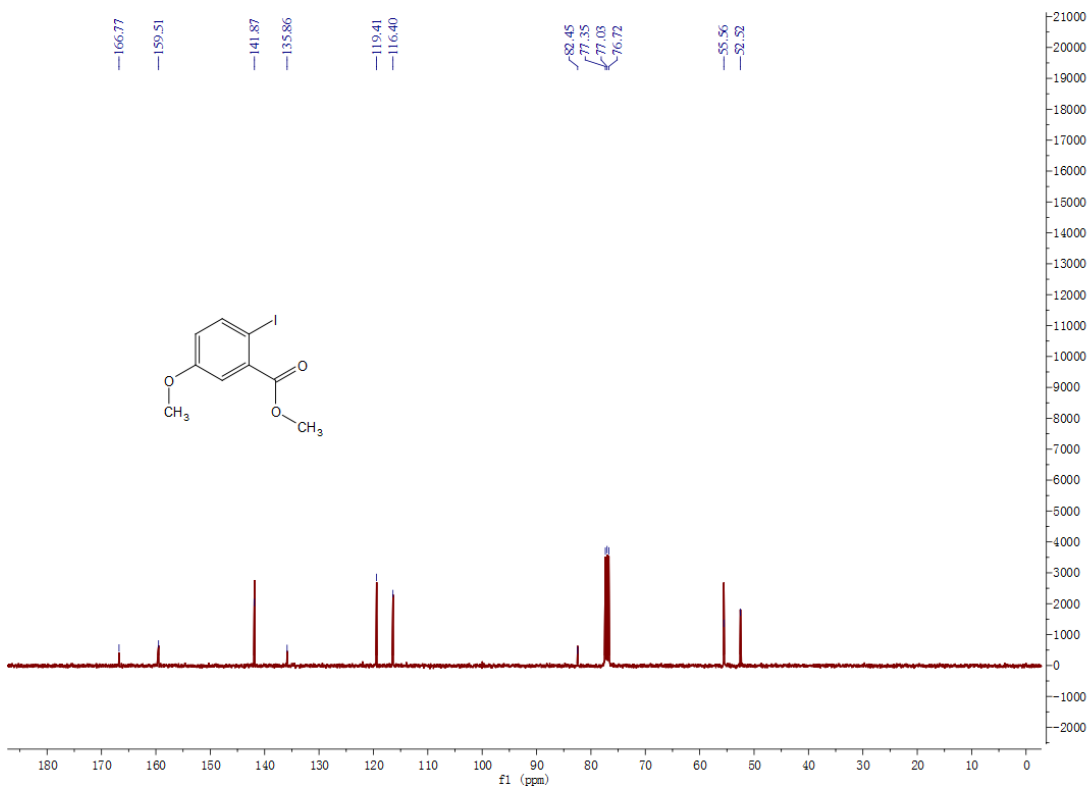

1j

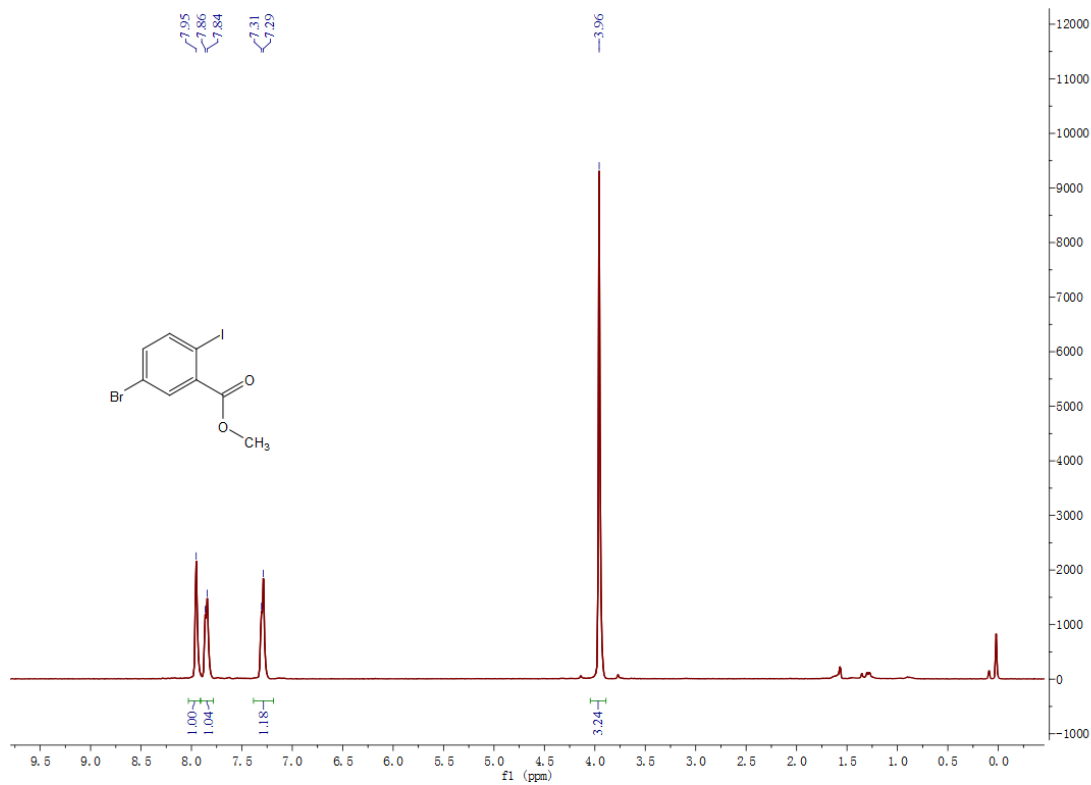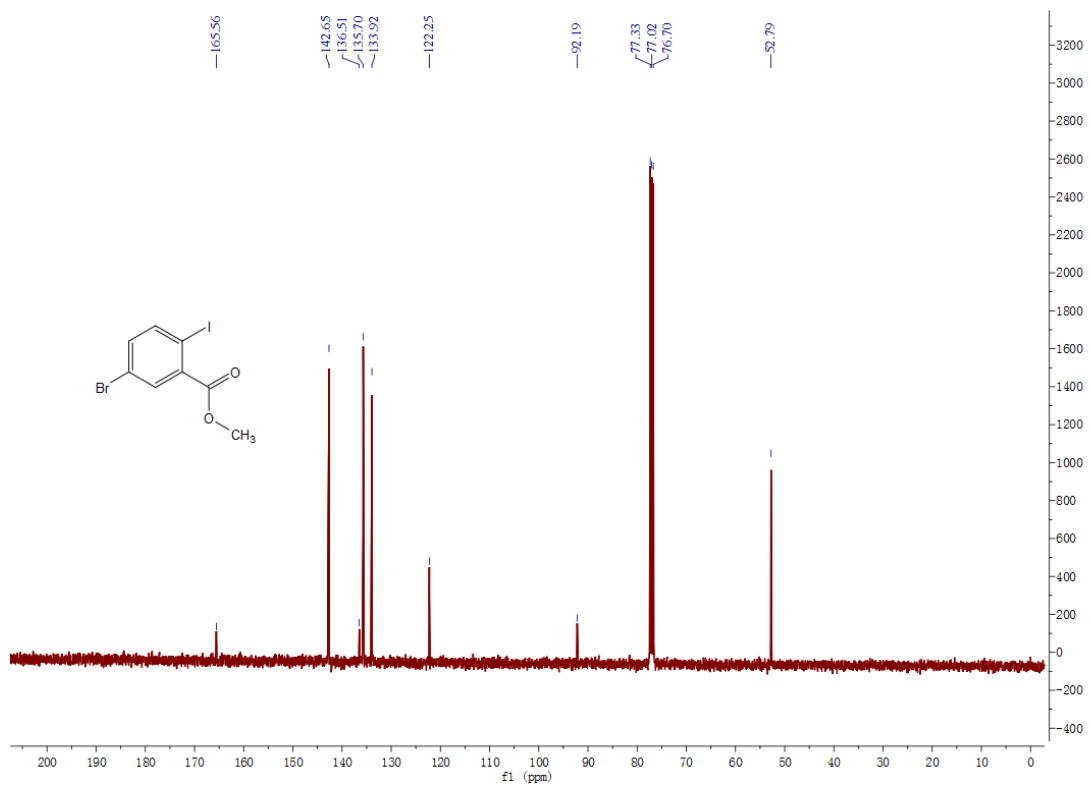

**1k**

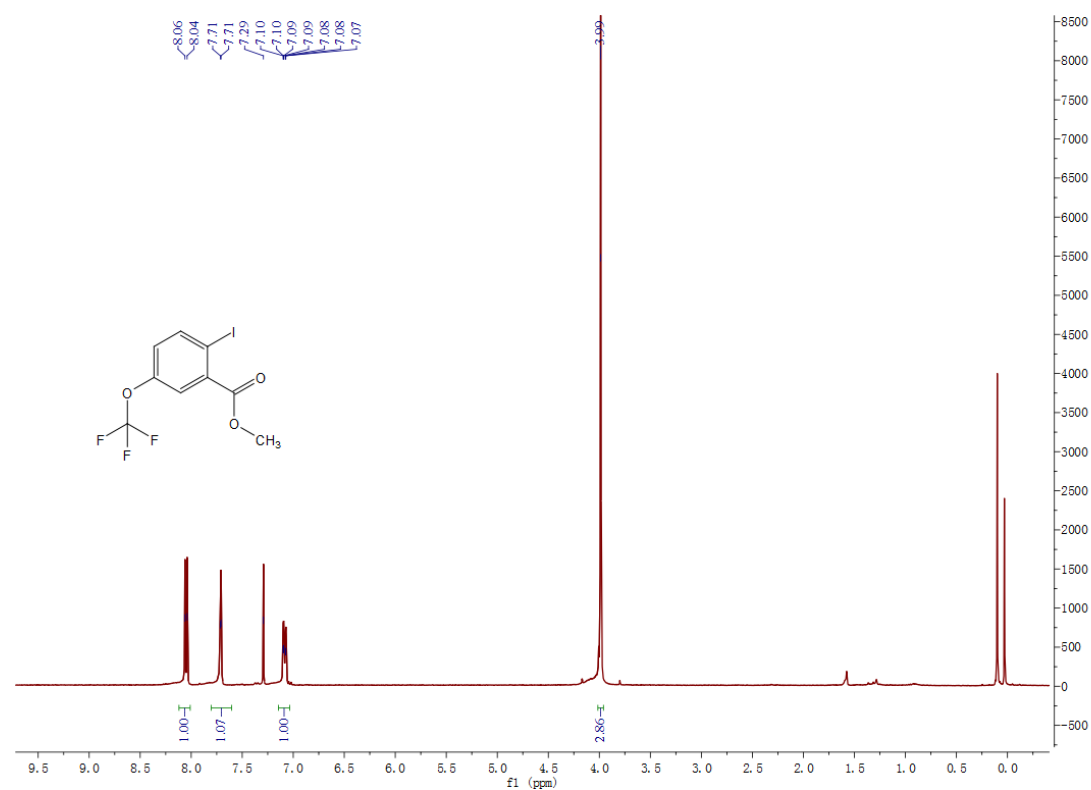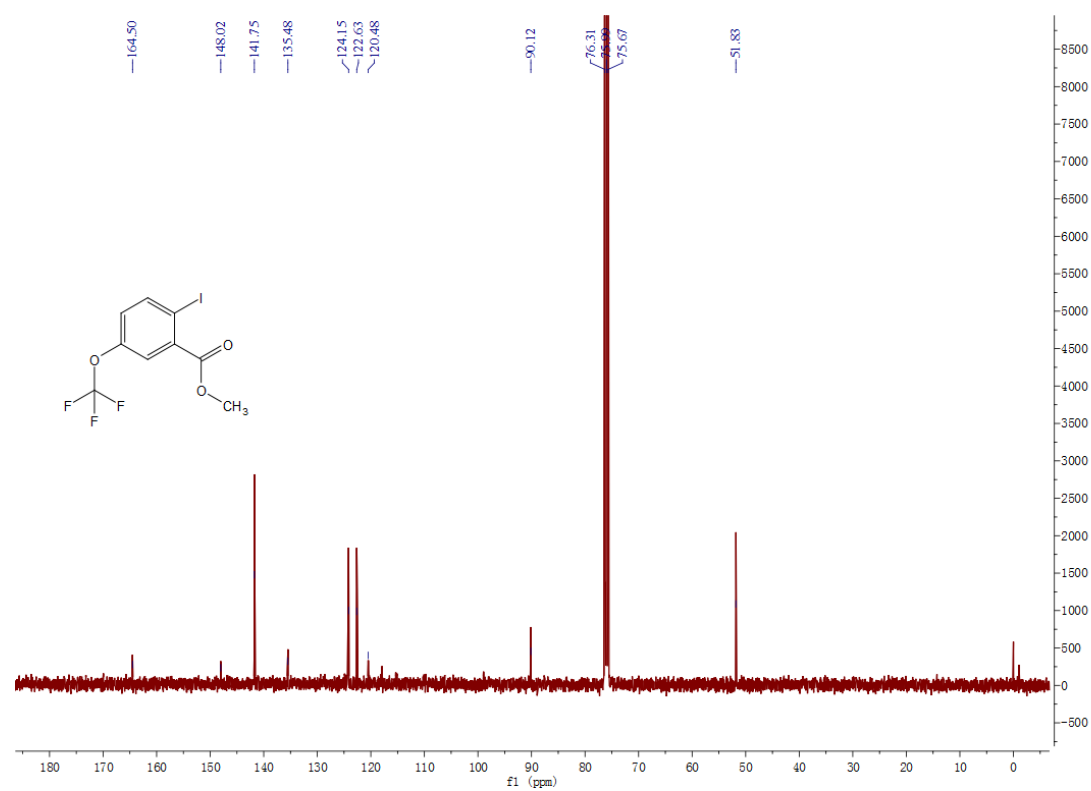

11

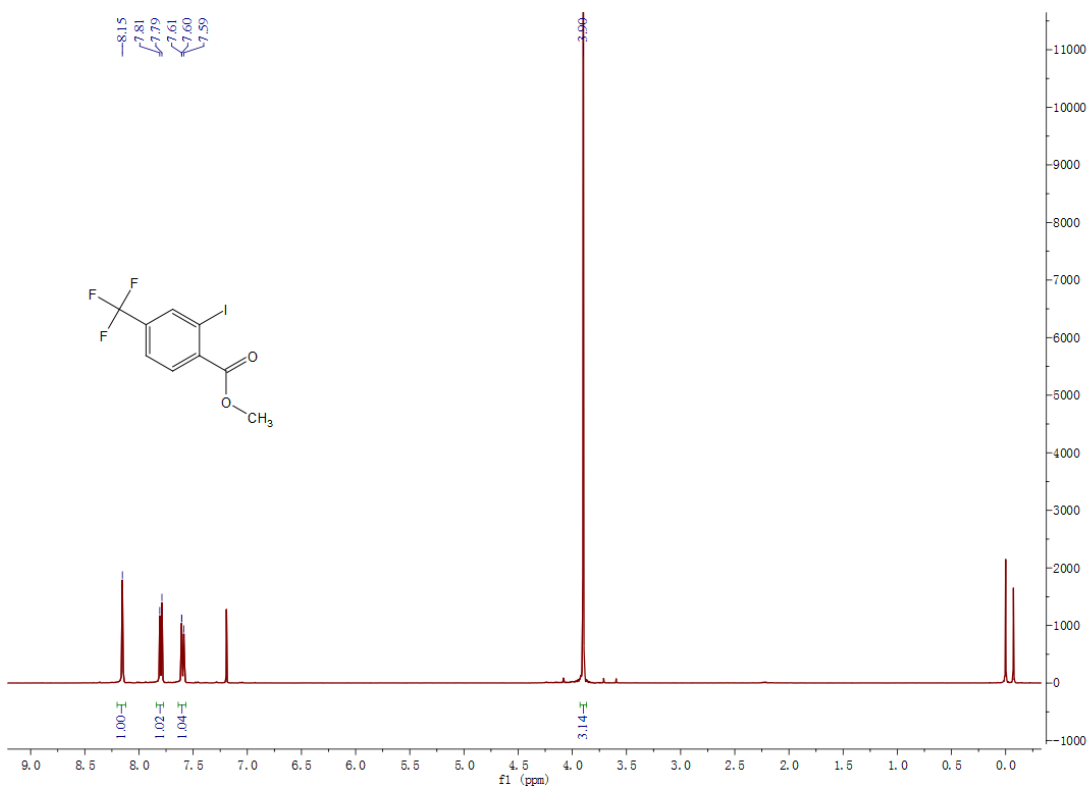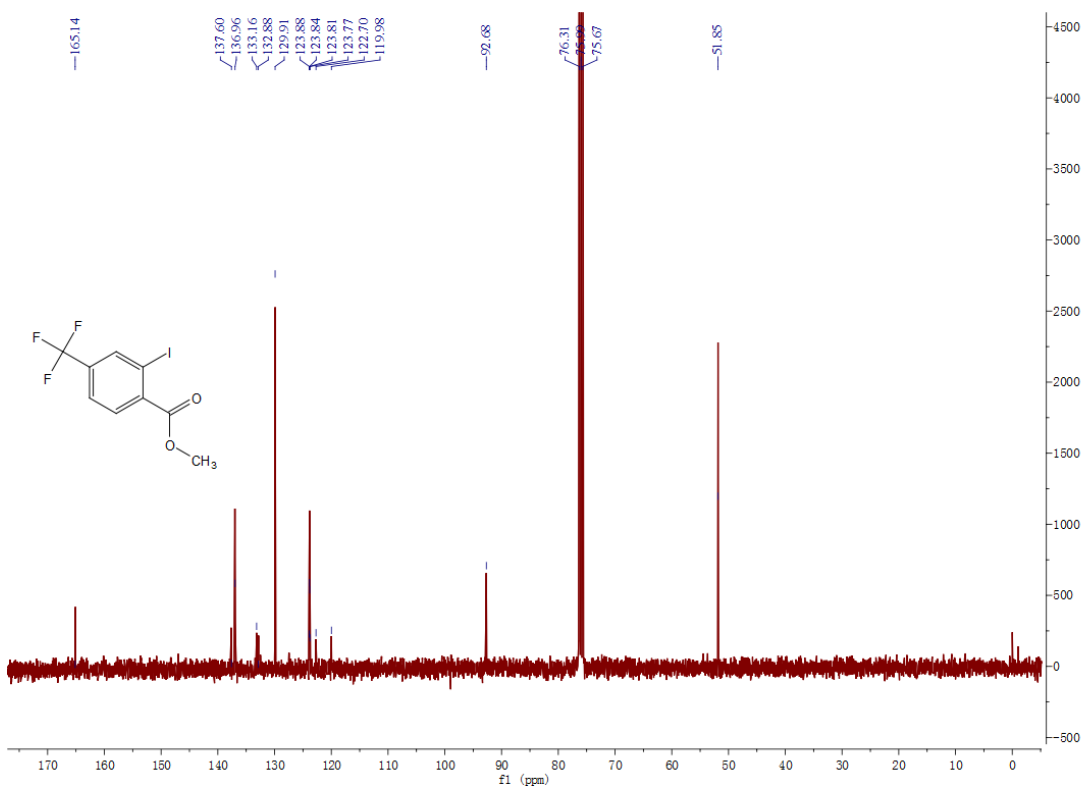

1m

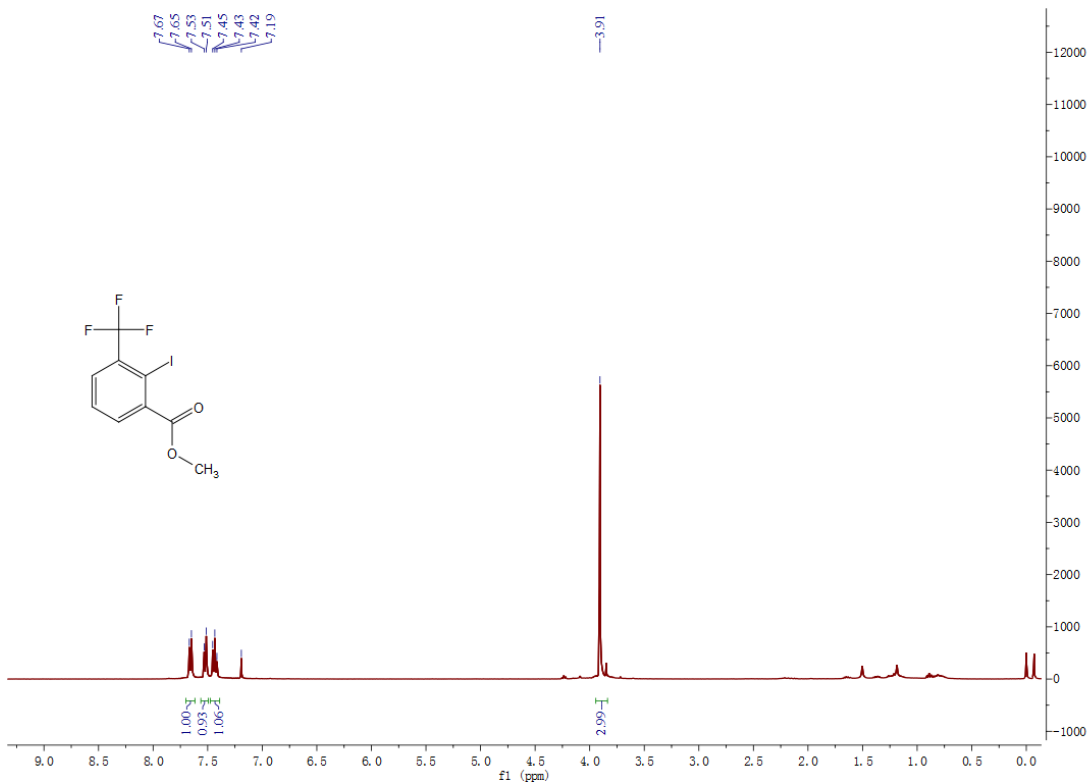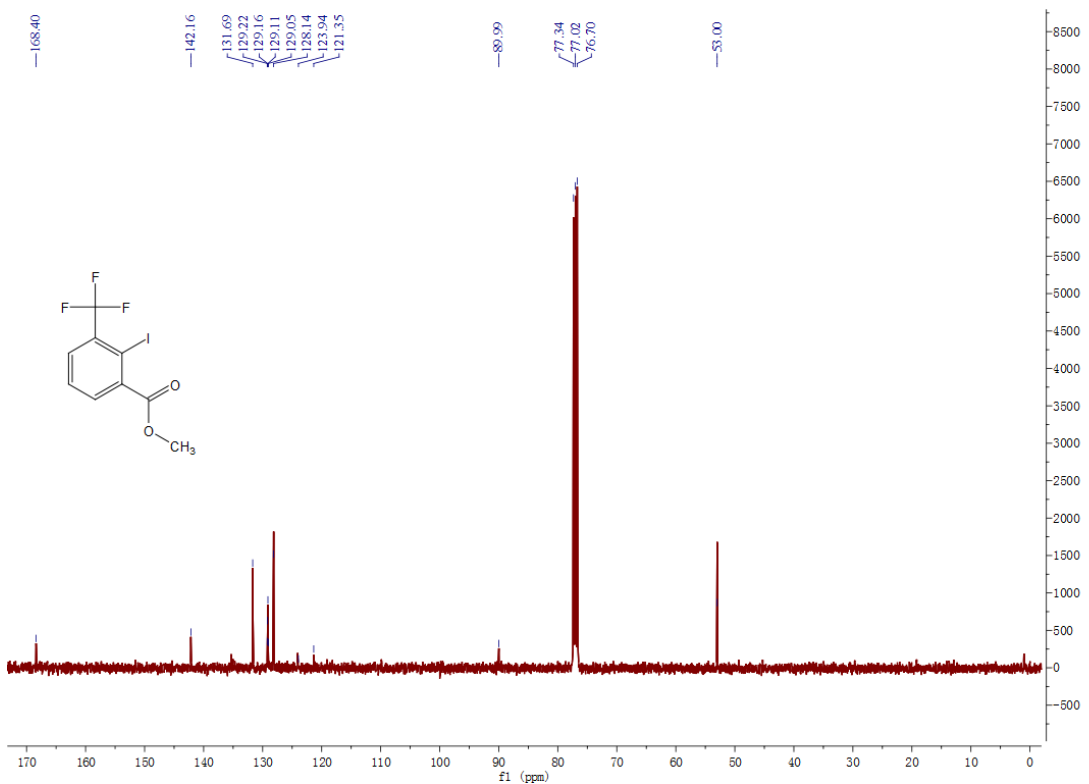

1n

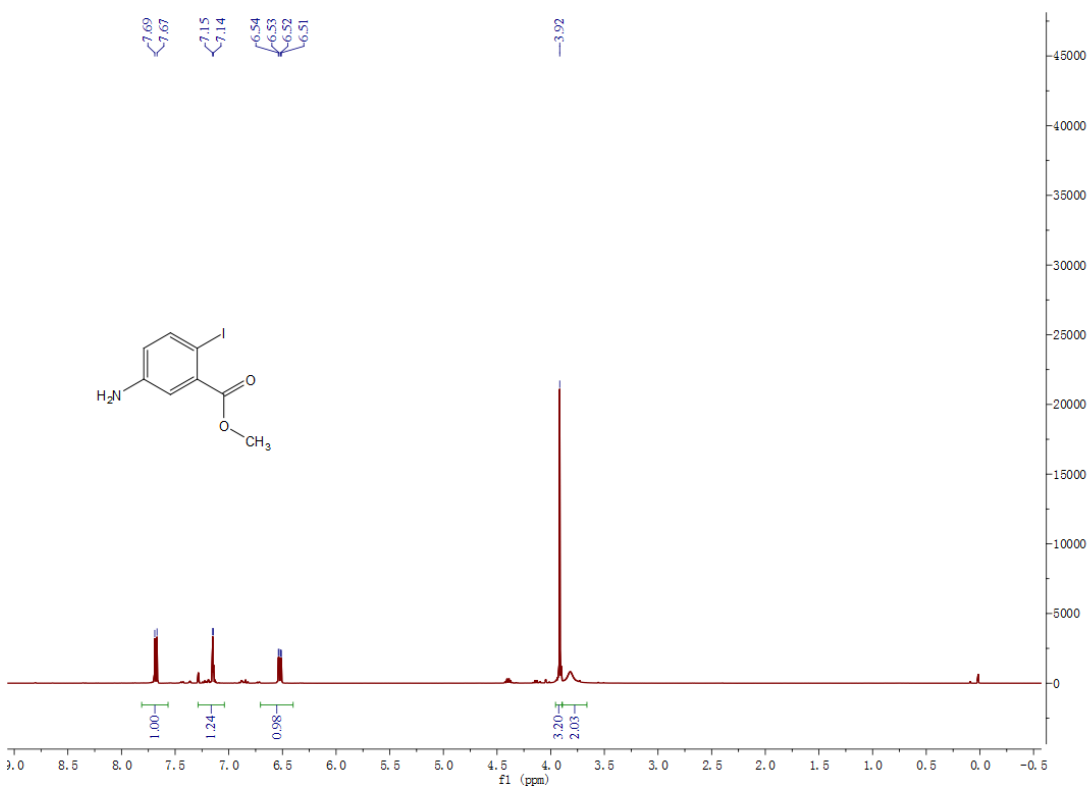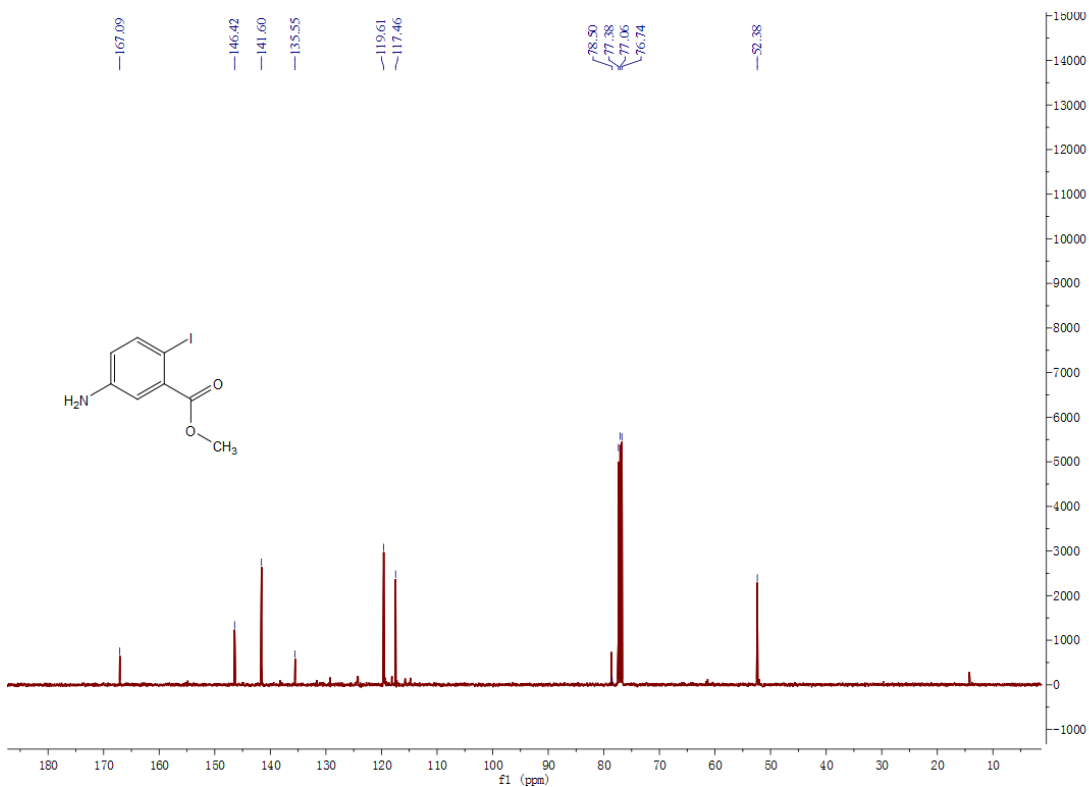

10

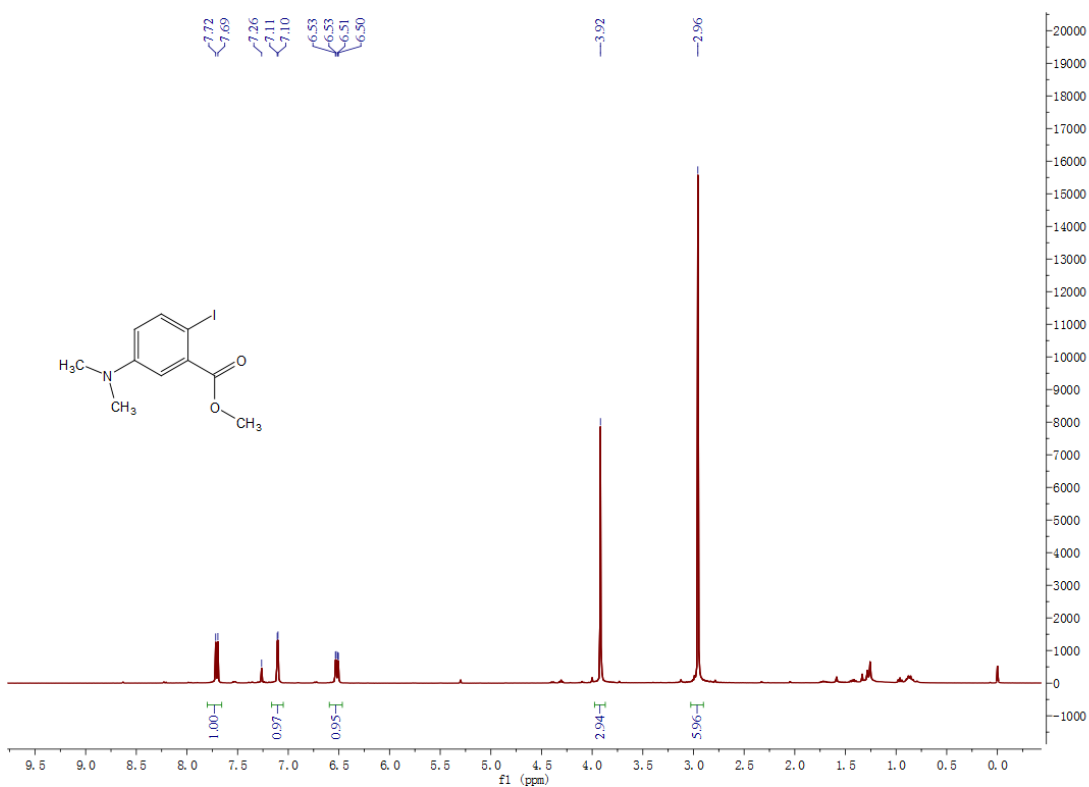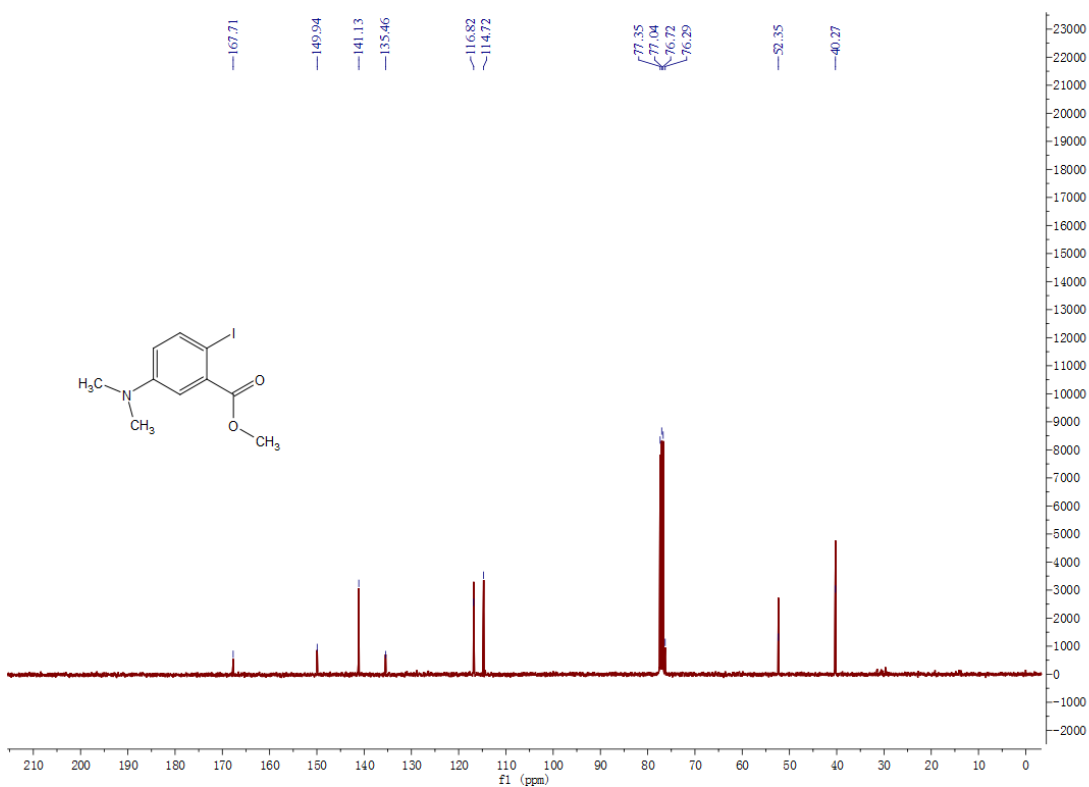



1q

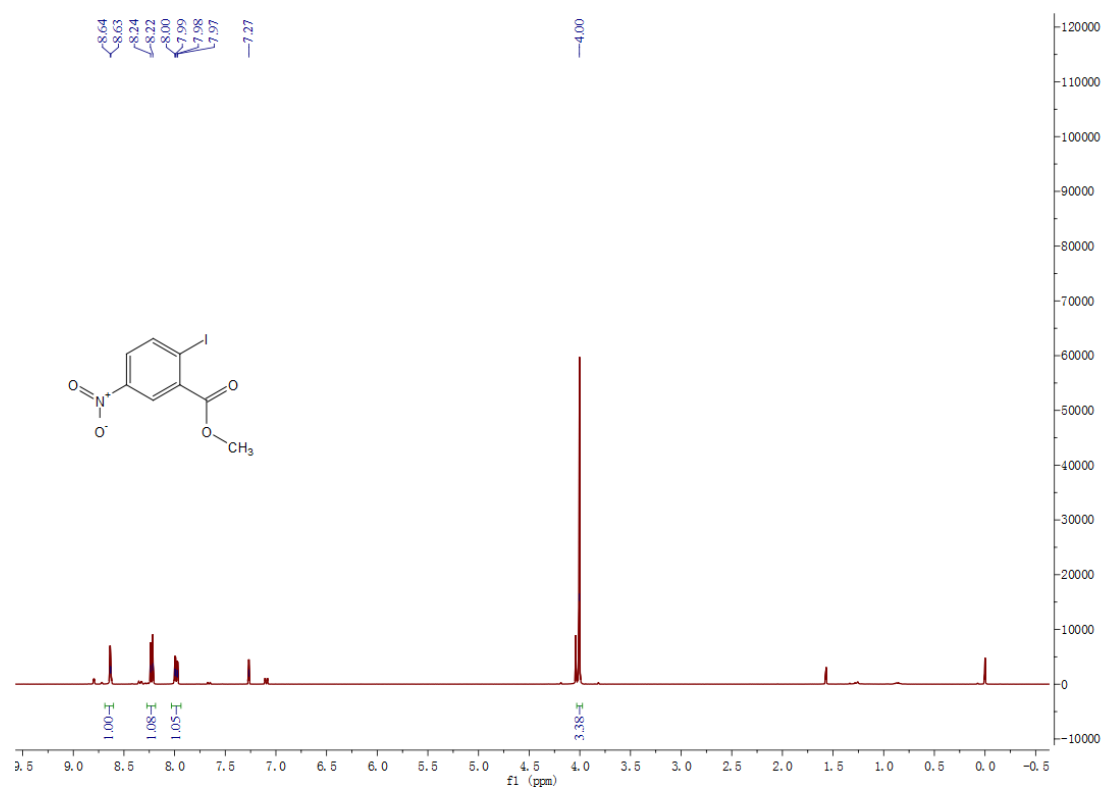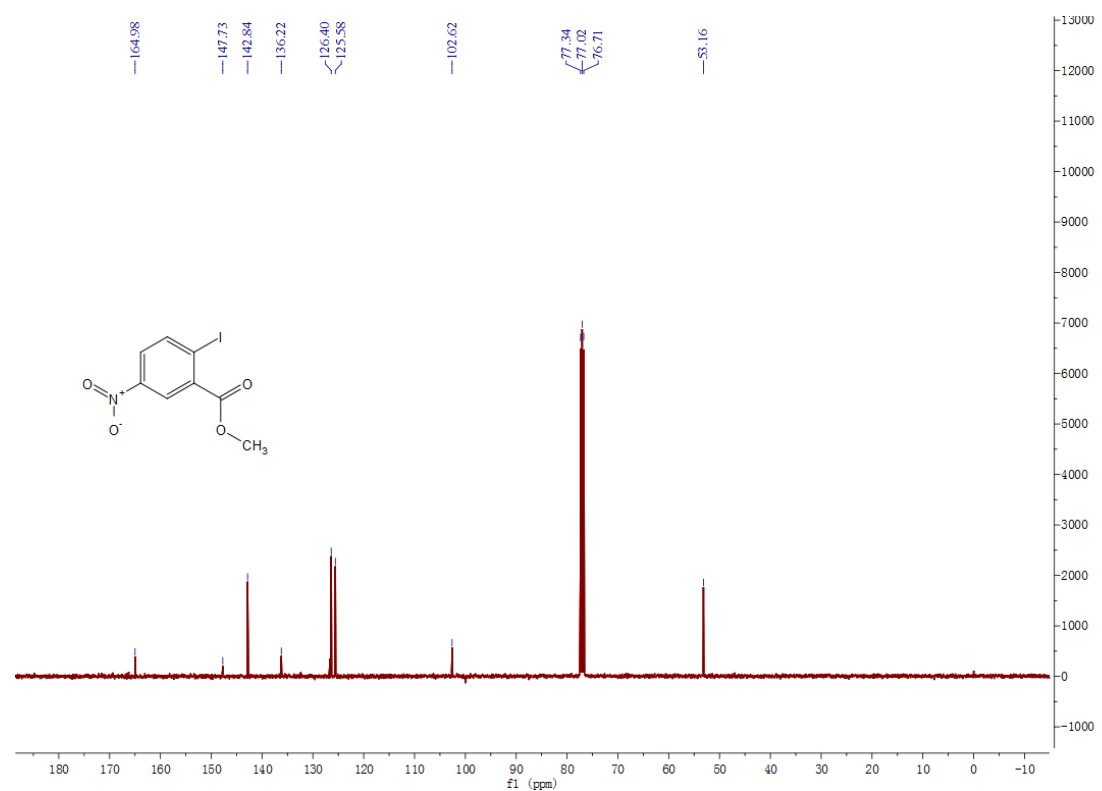

2c

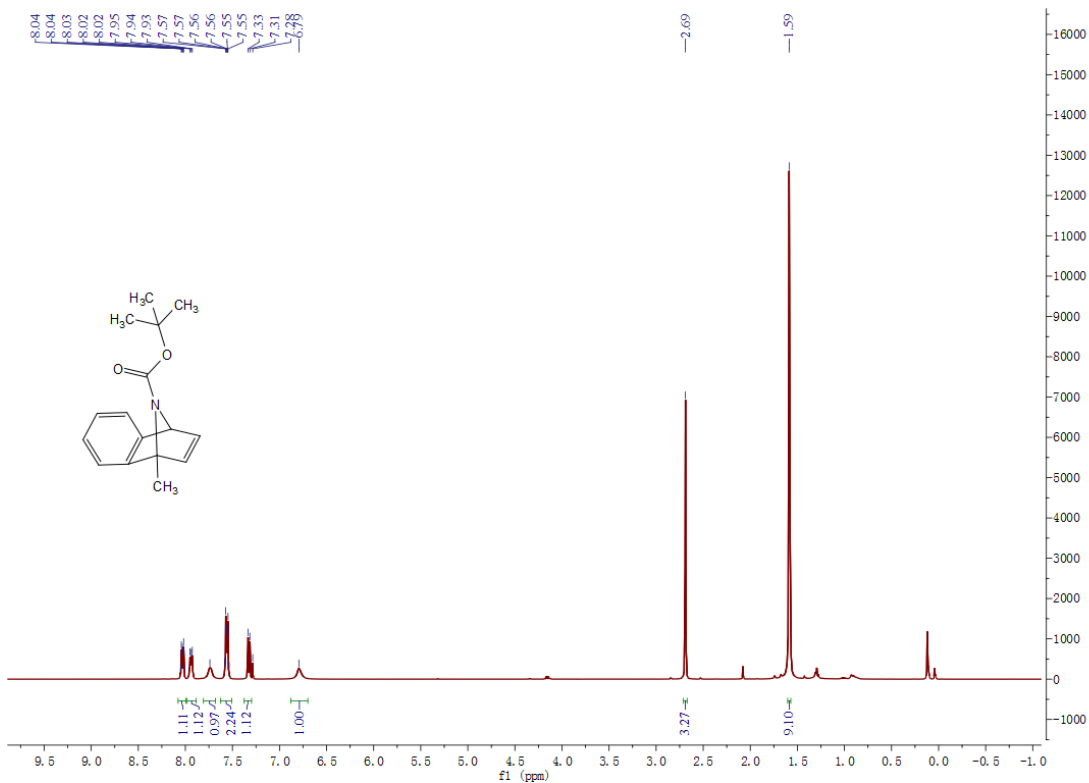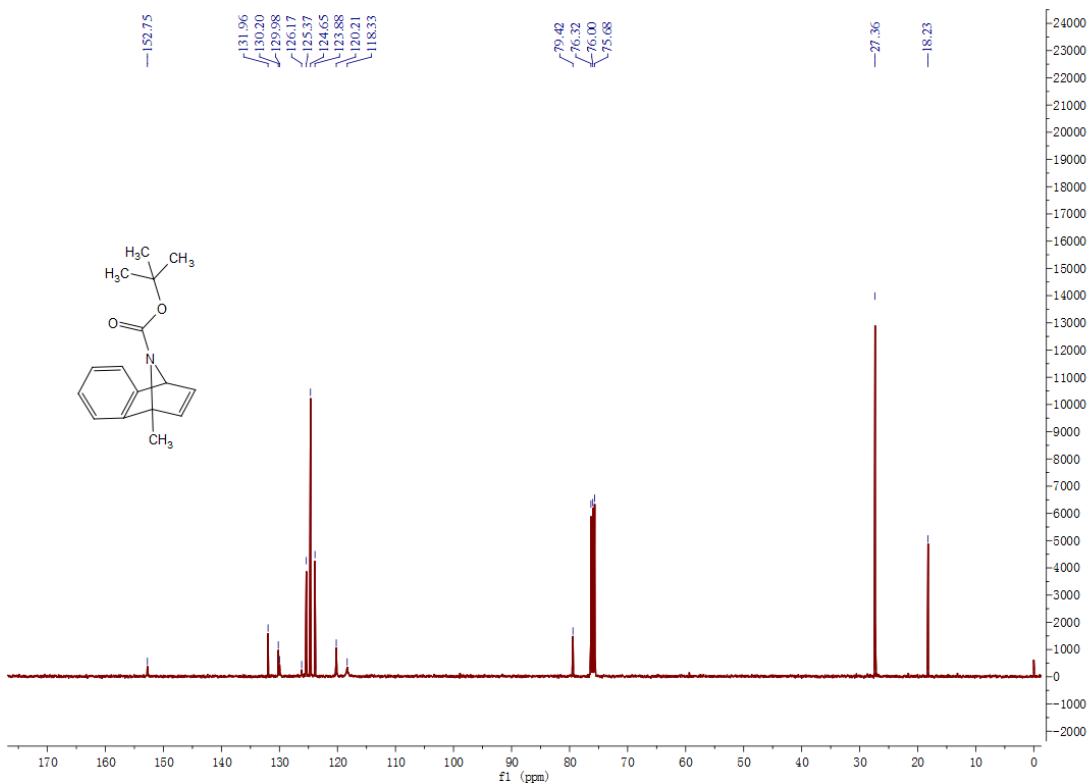

3aa

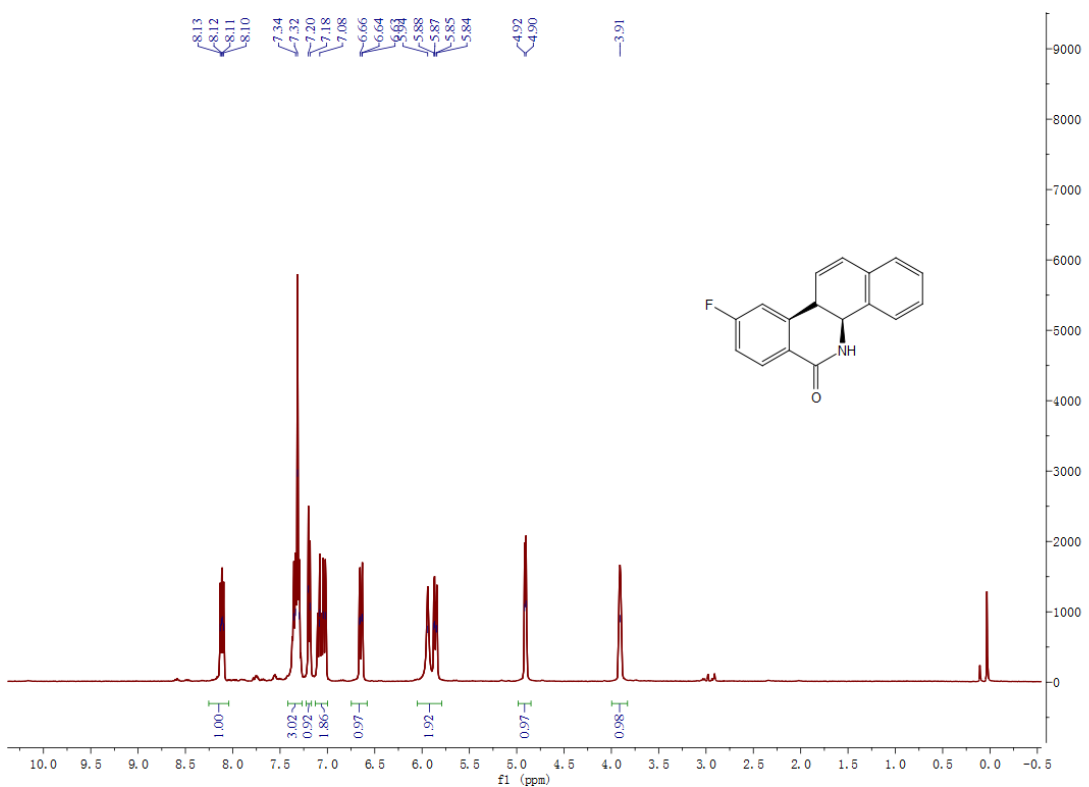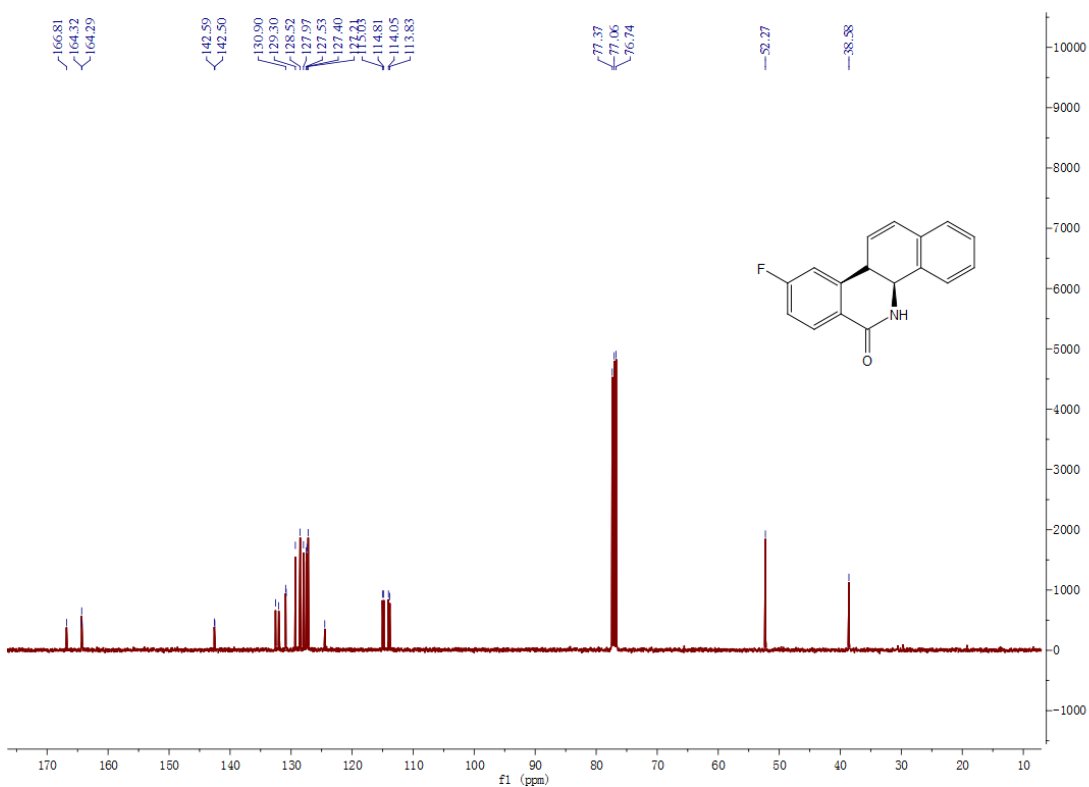

4aa

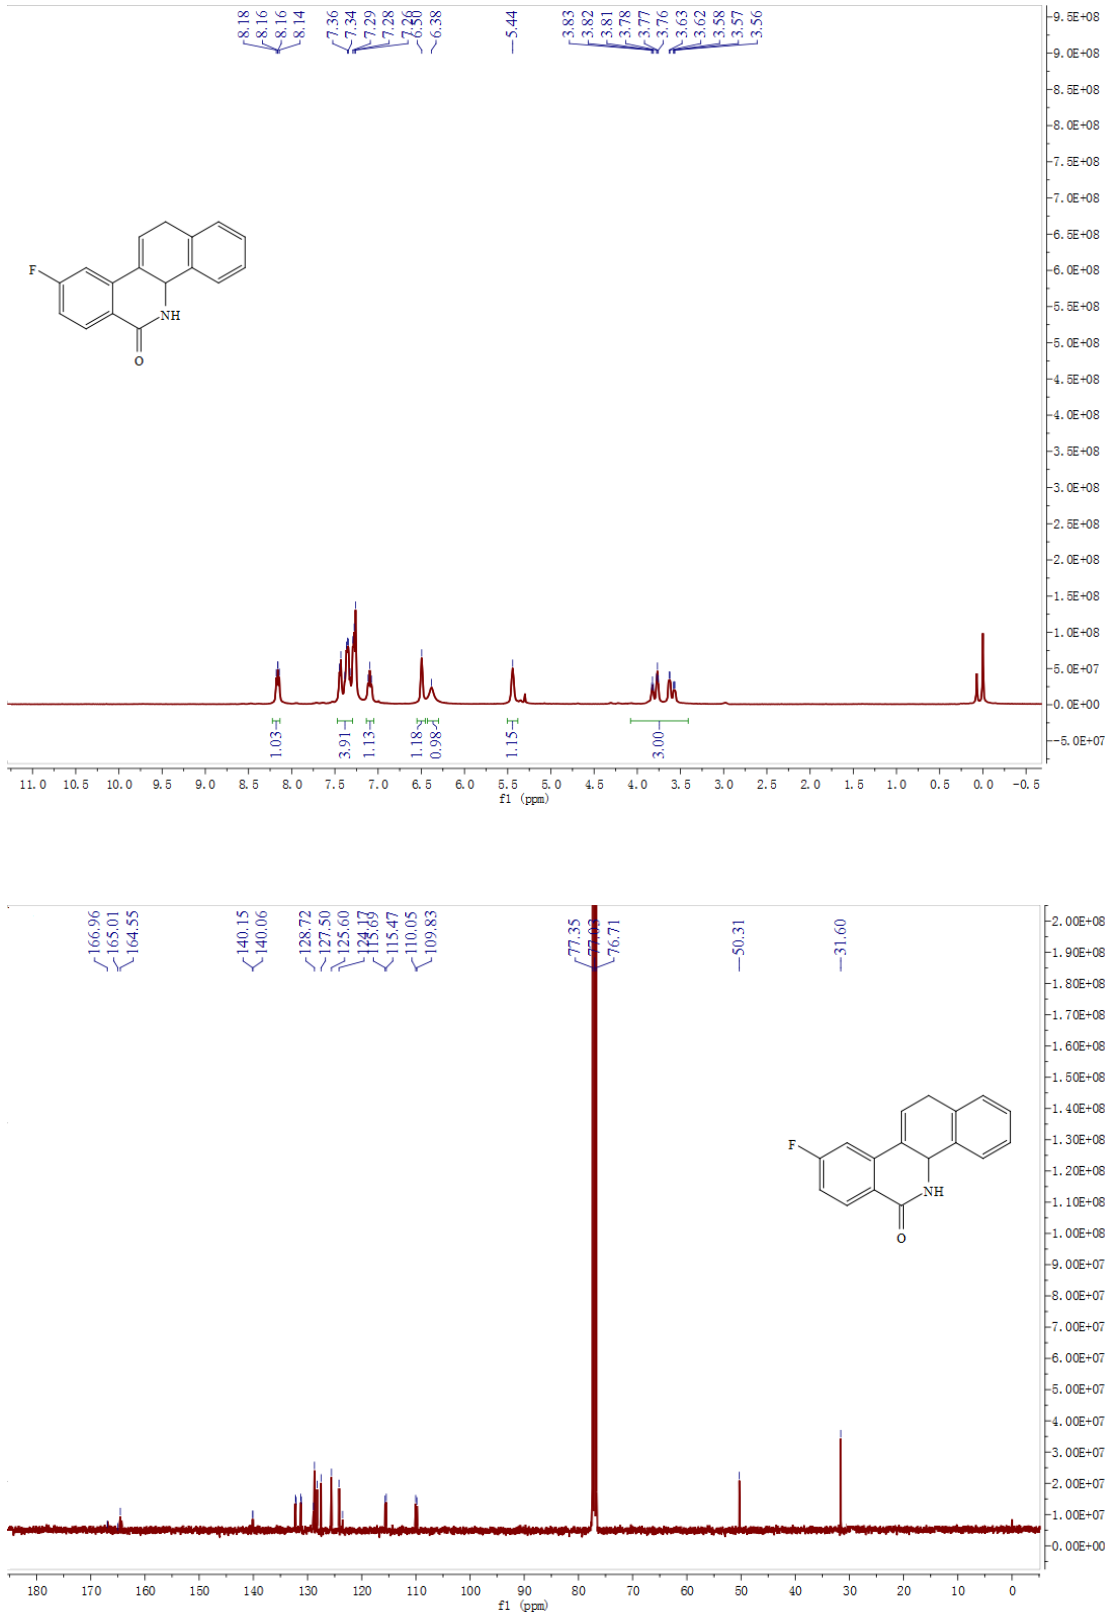

5aa

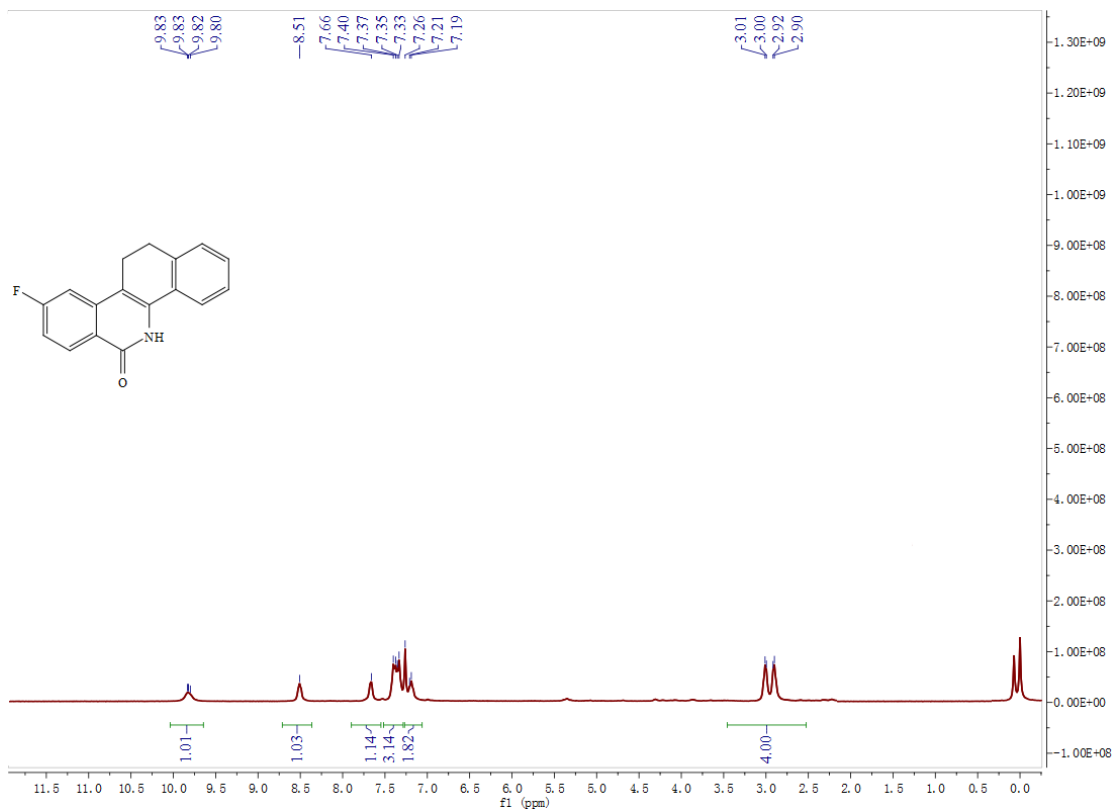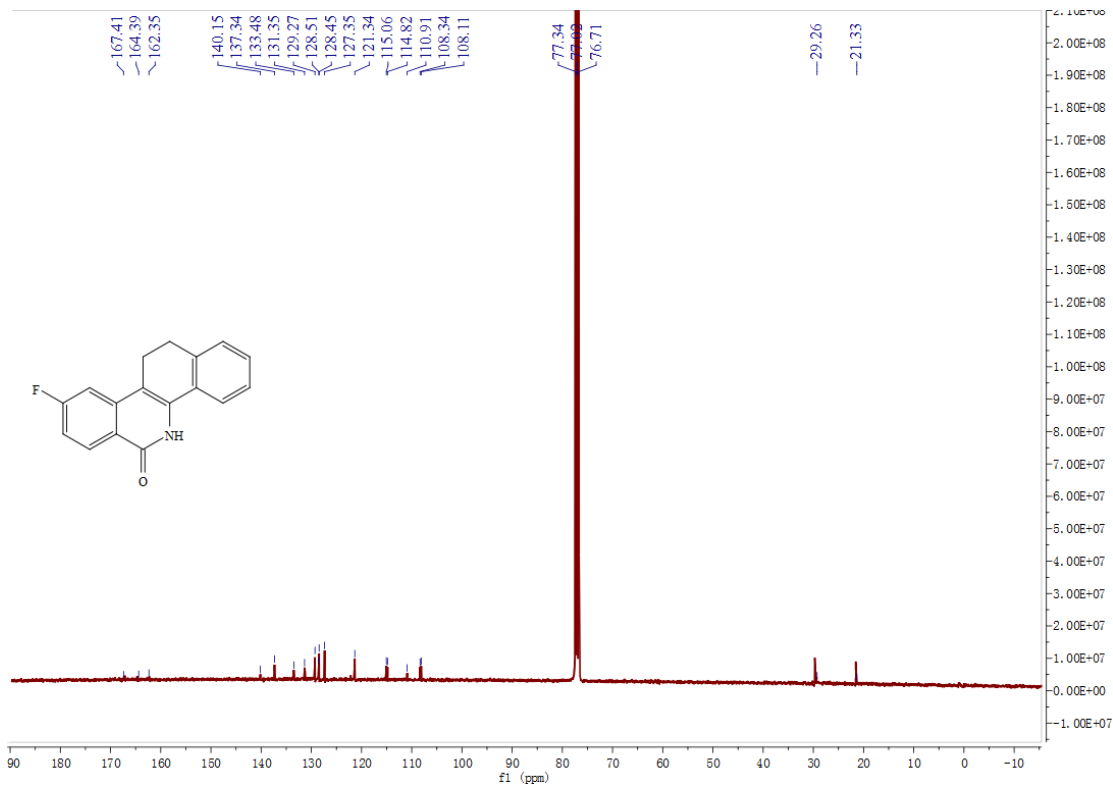

3ab

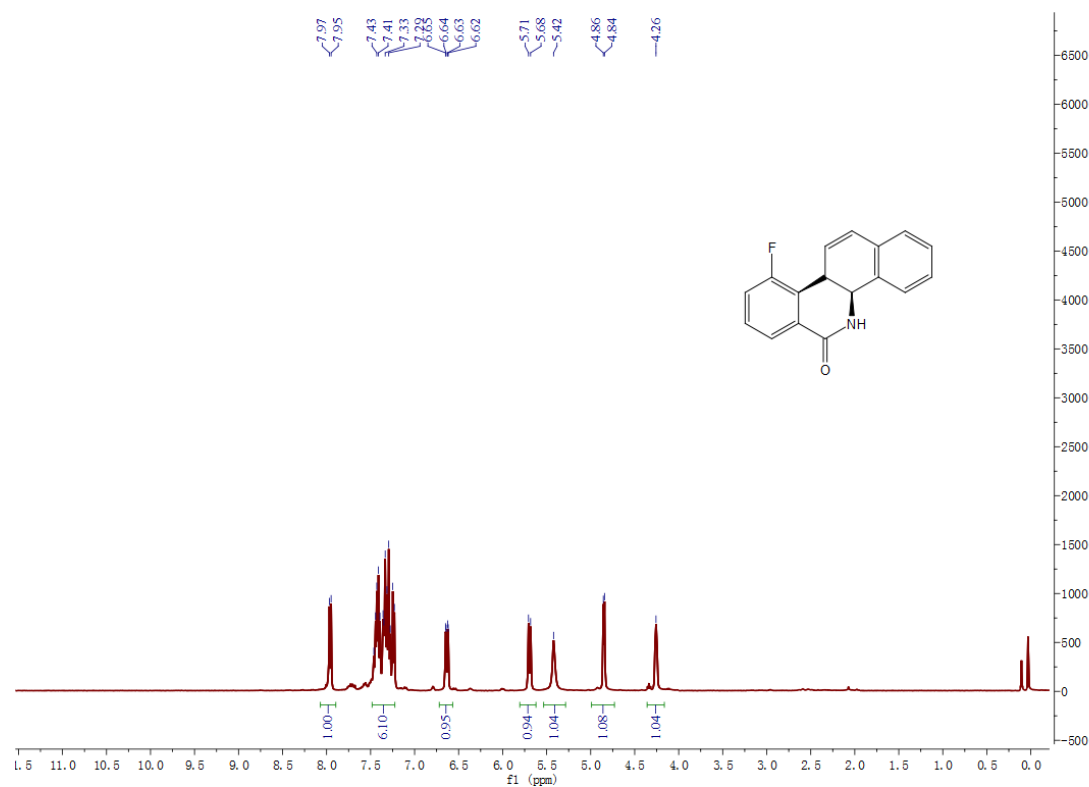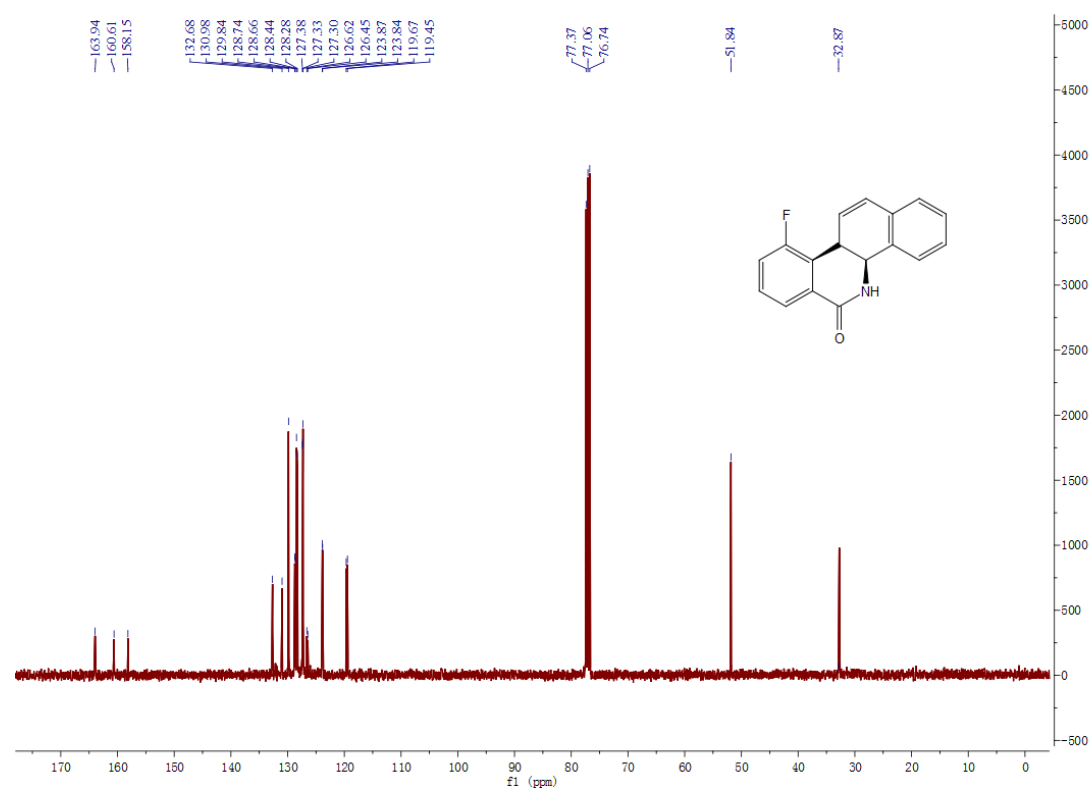

3ac

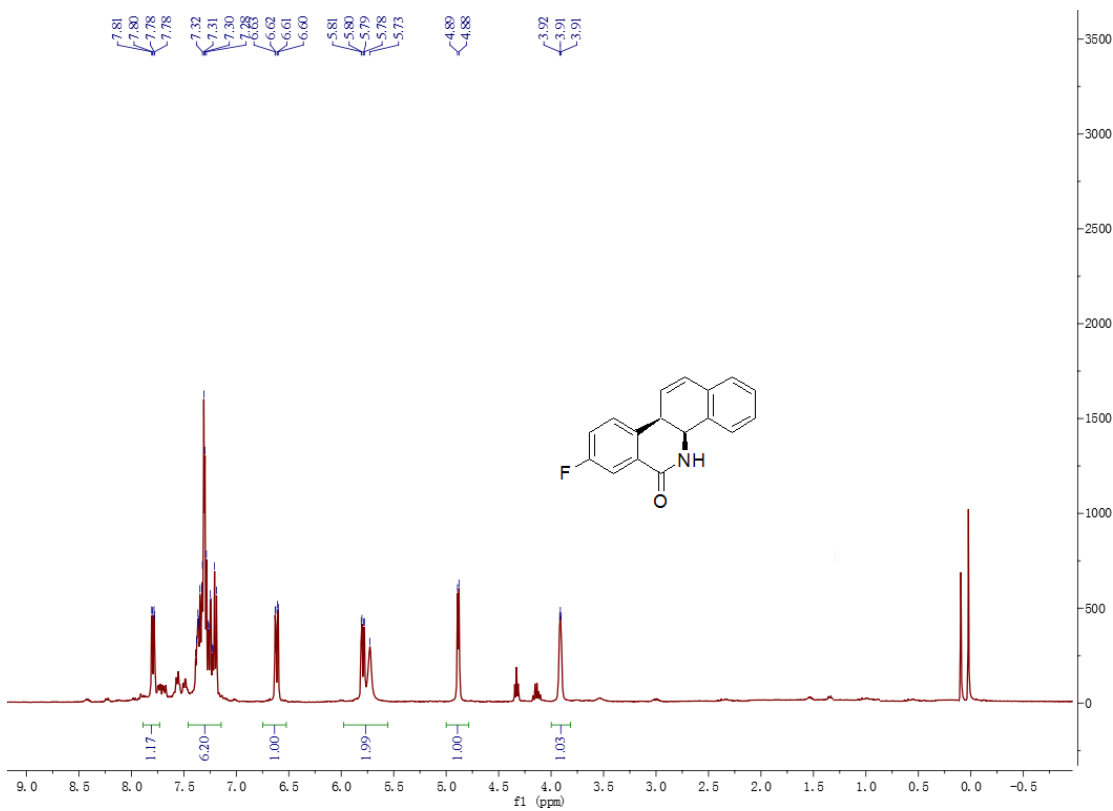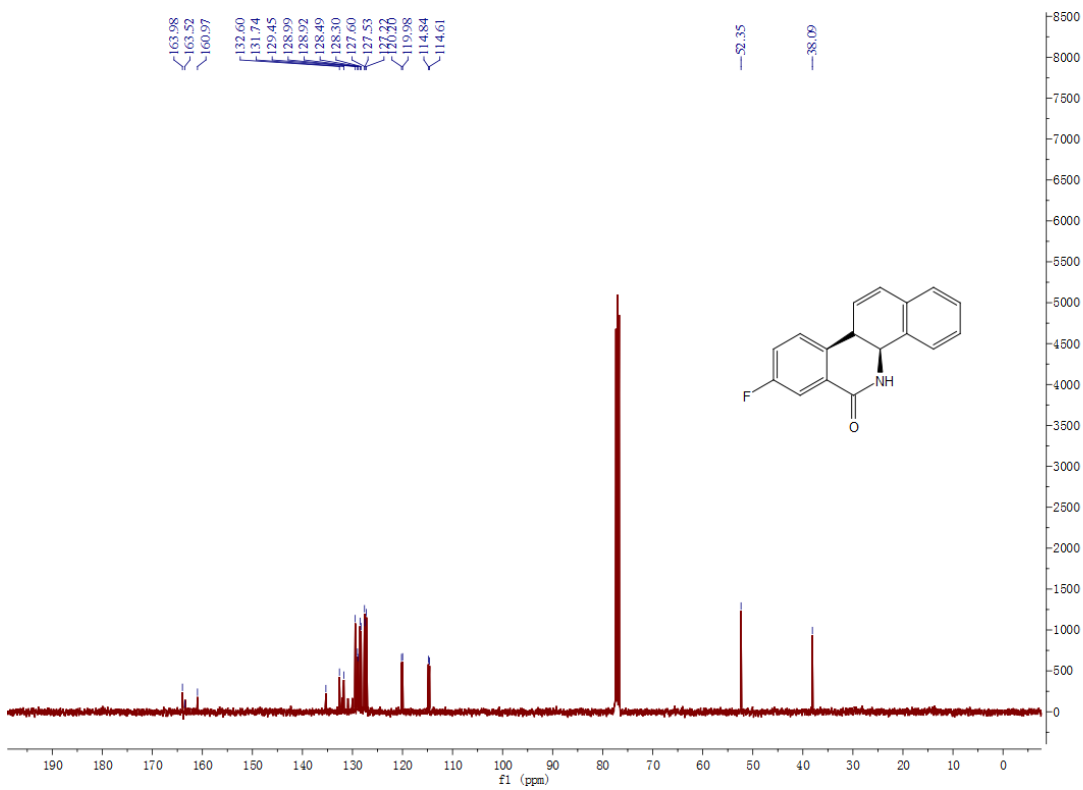

3ad

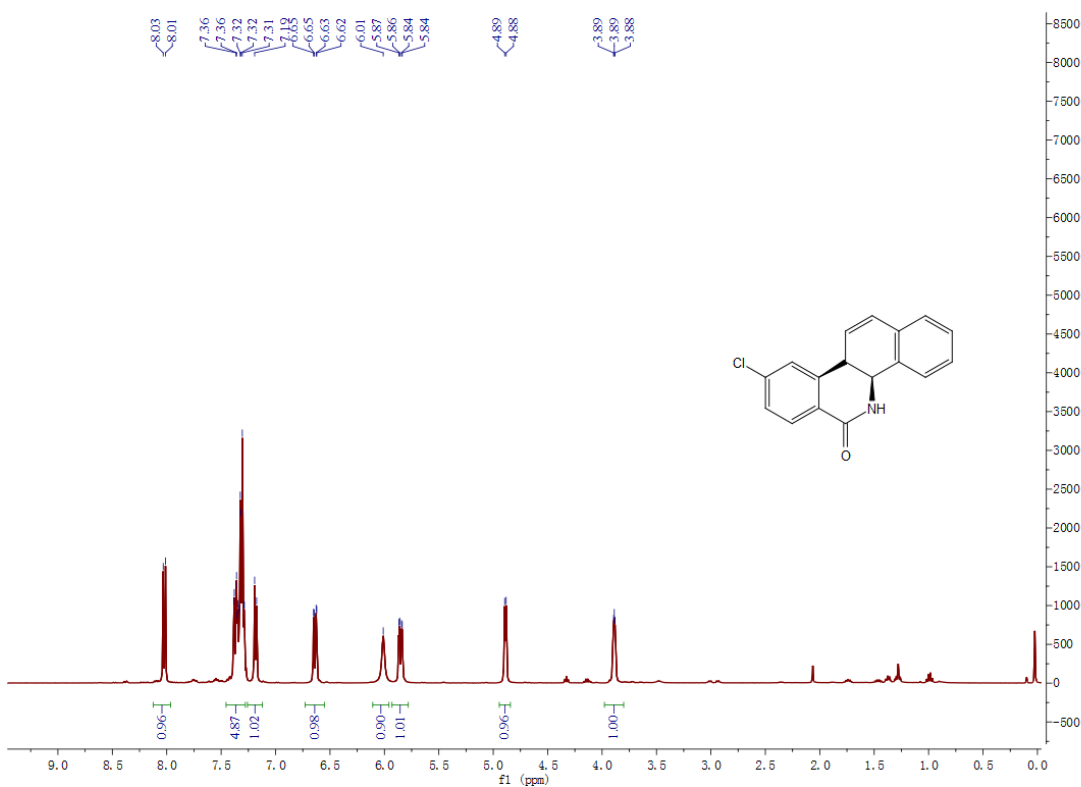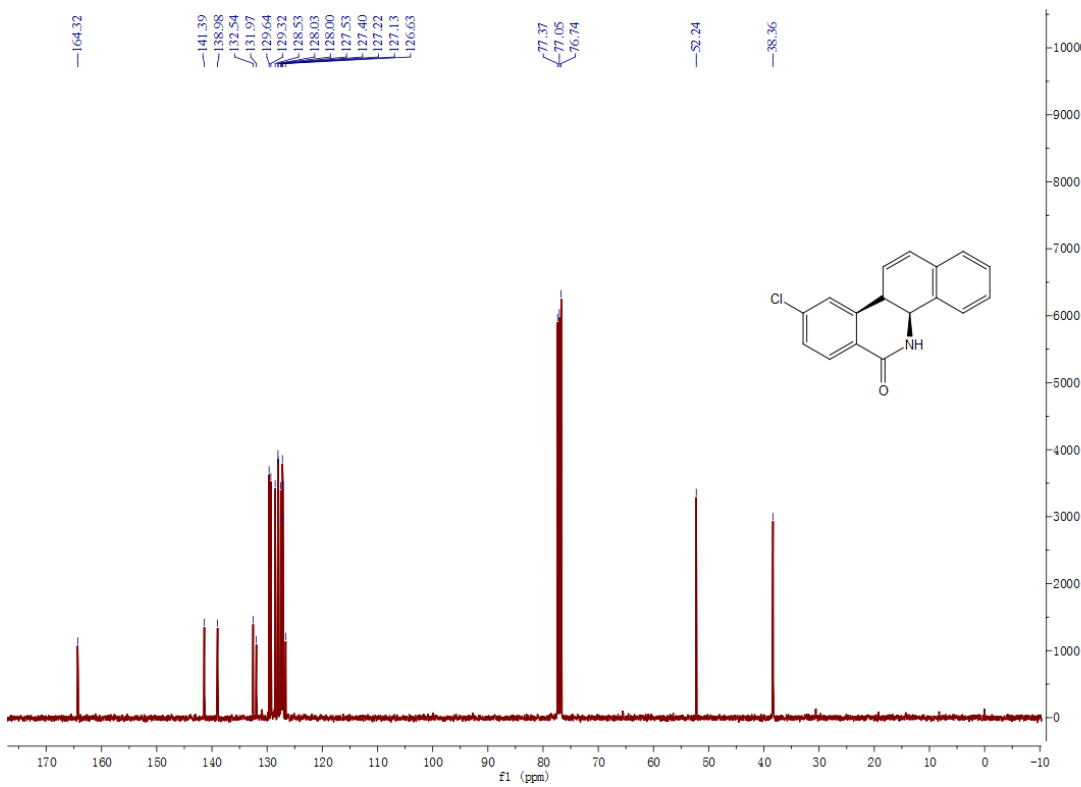



3ae

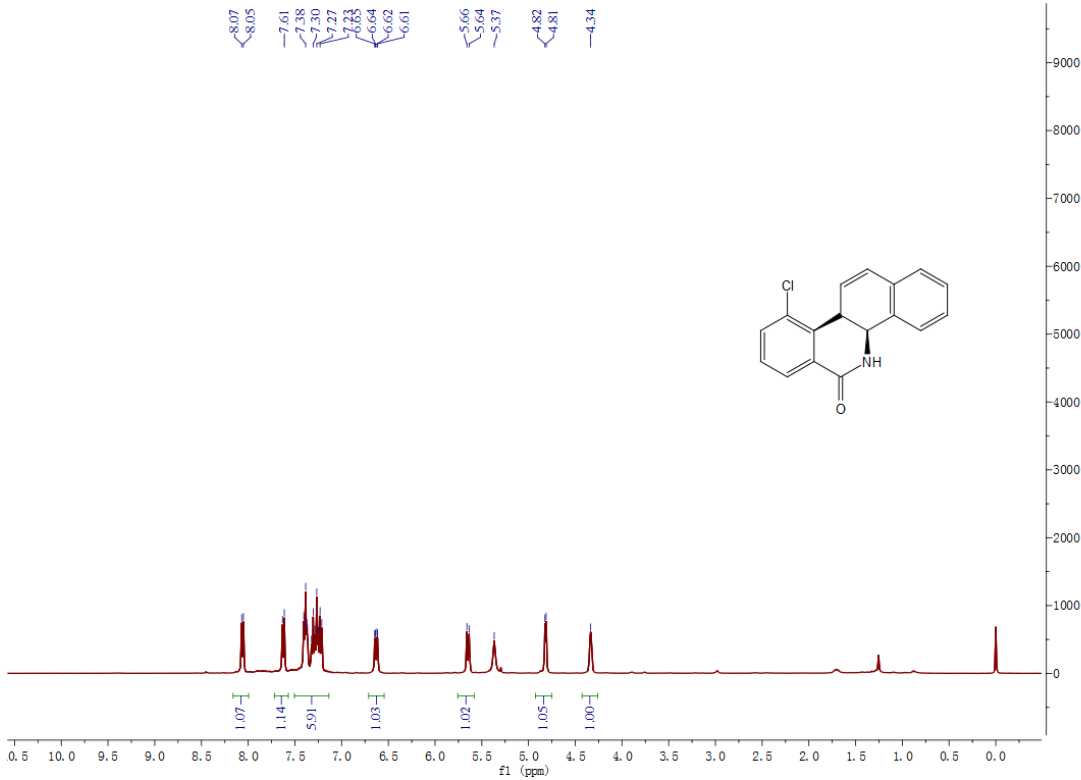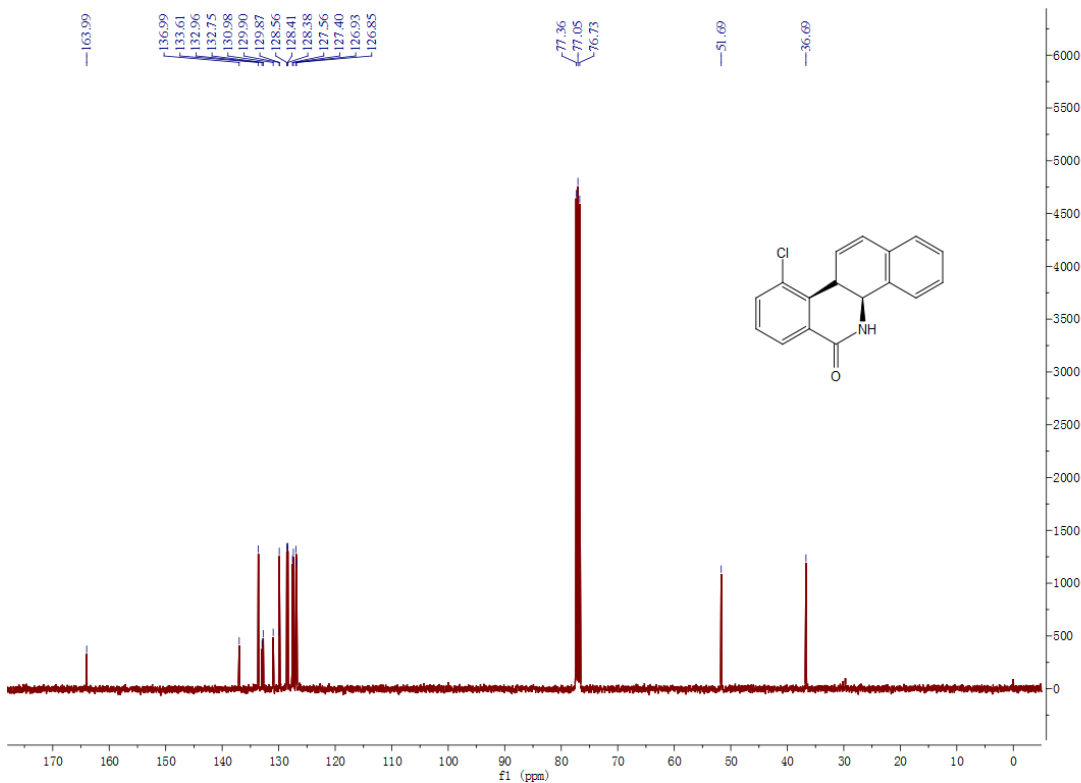

3af

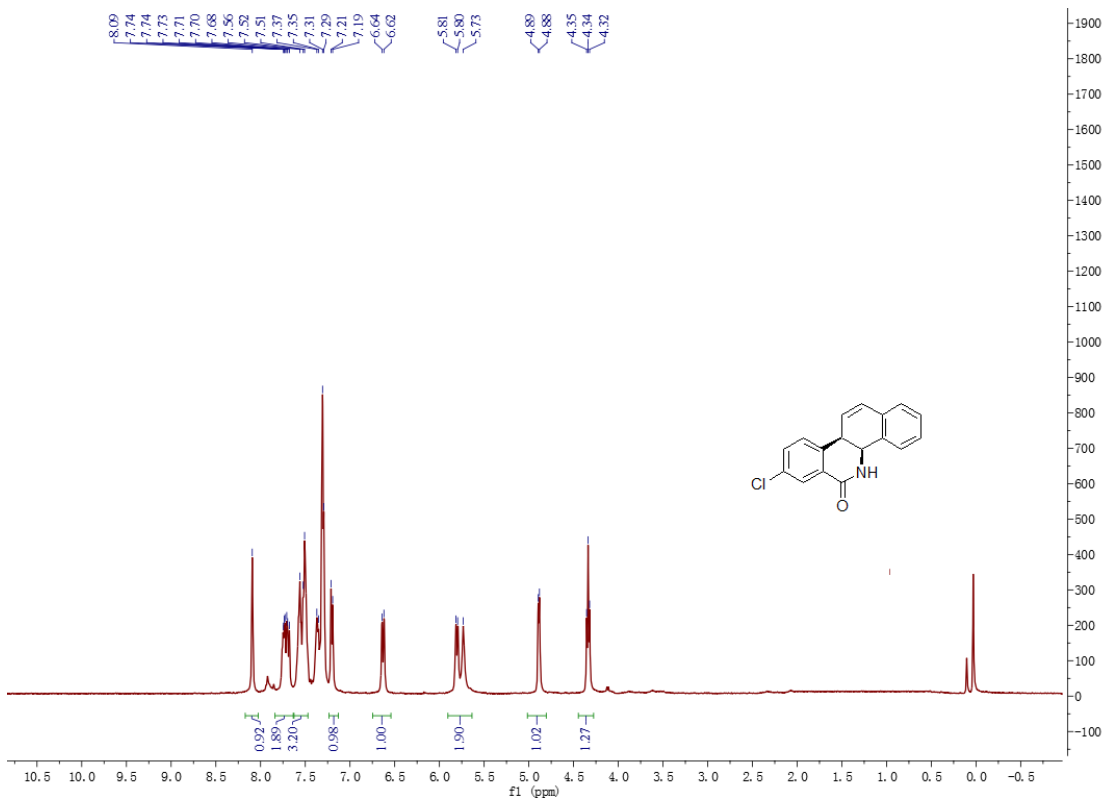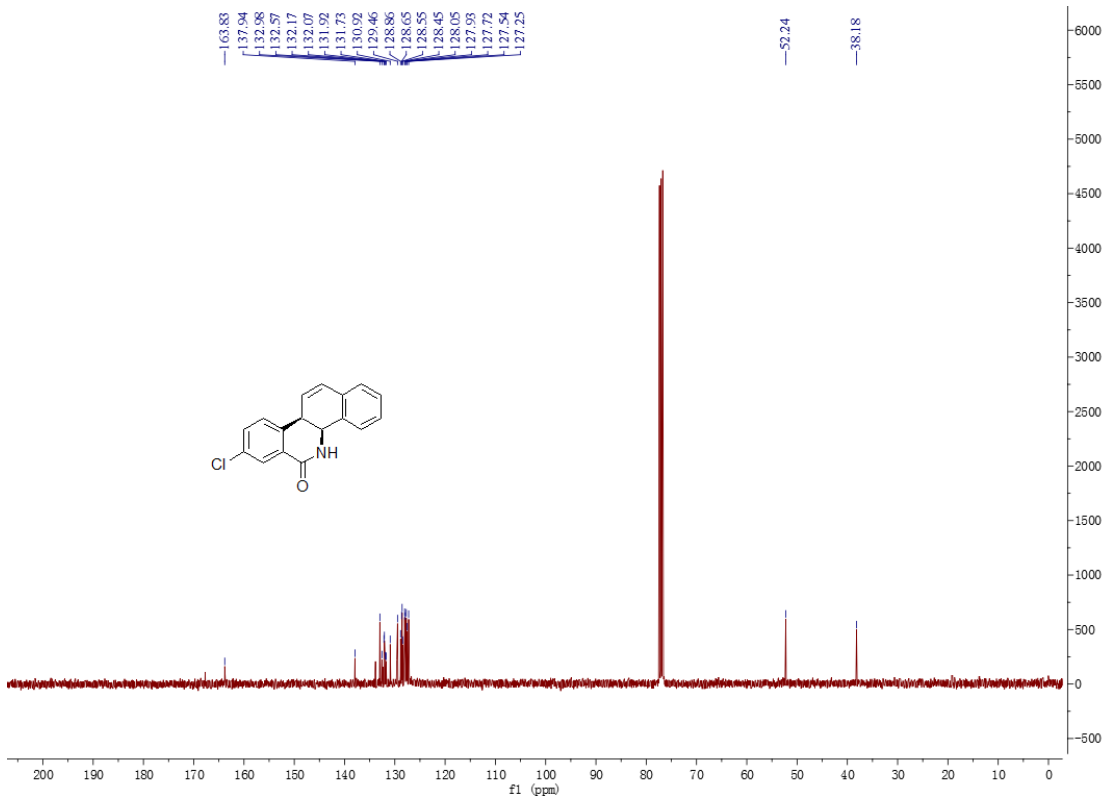

3ag

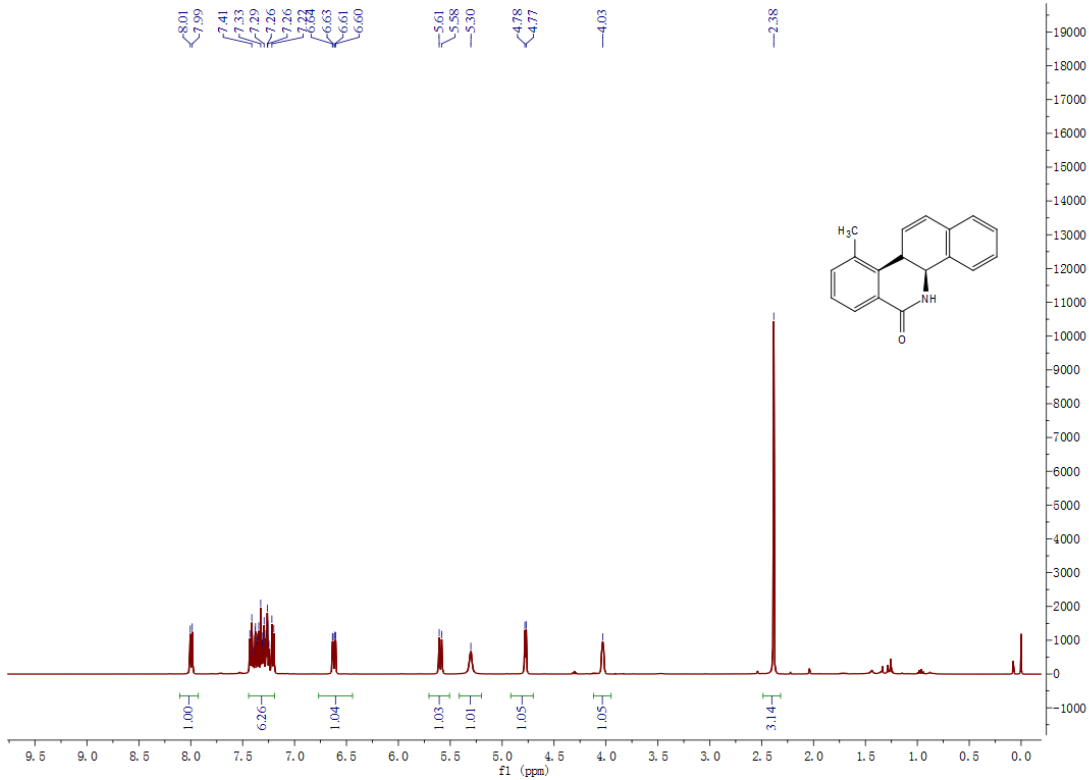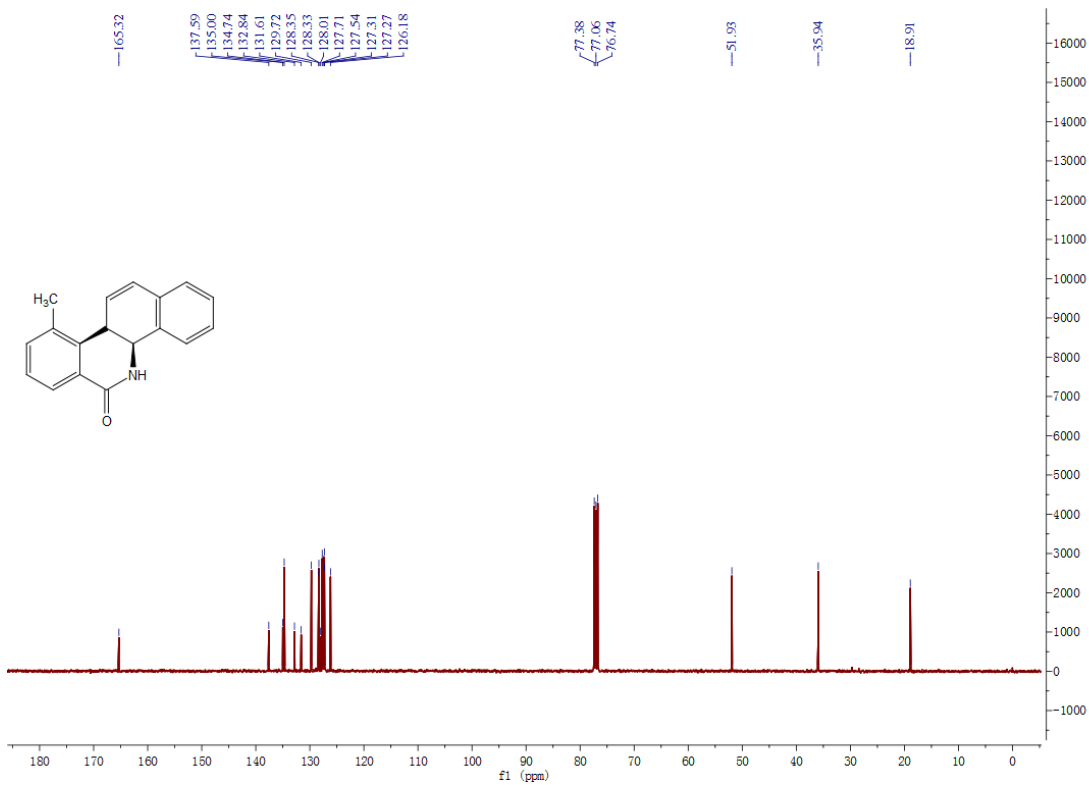

3ah

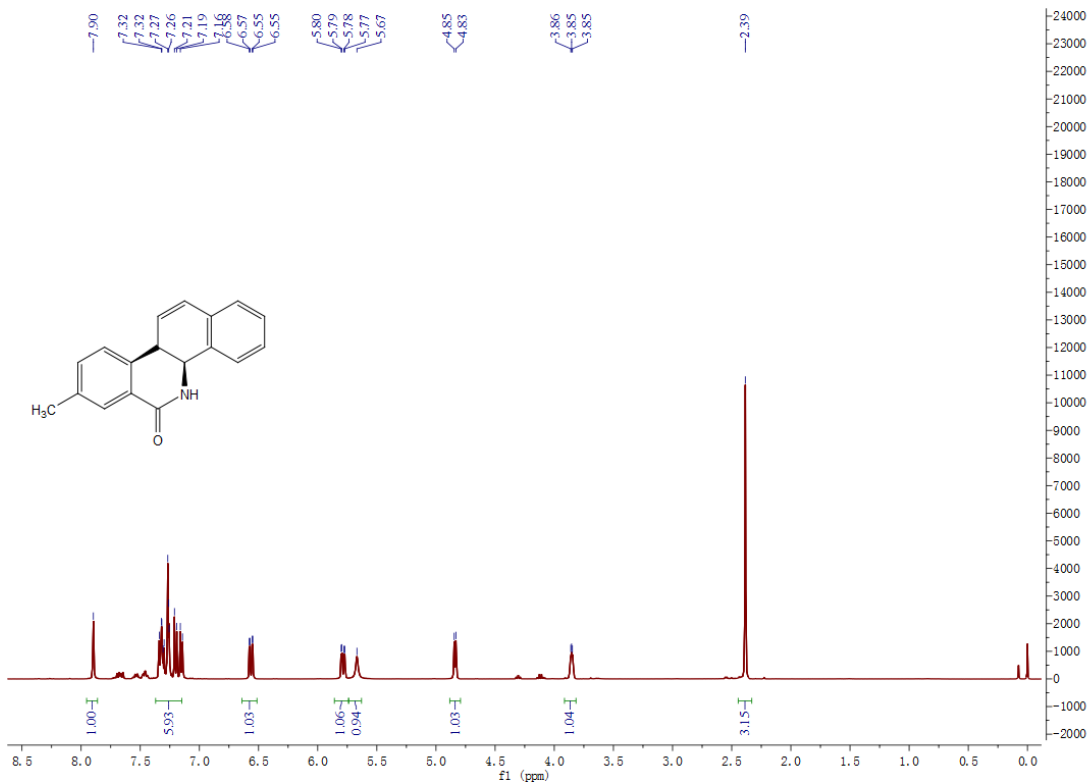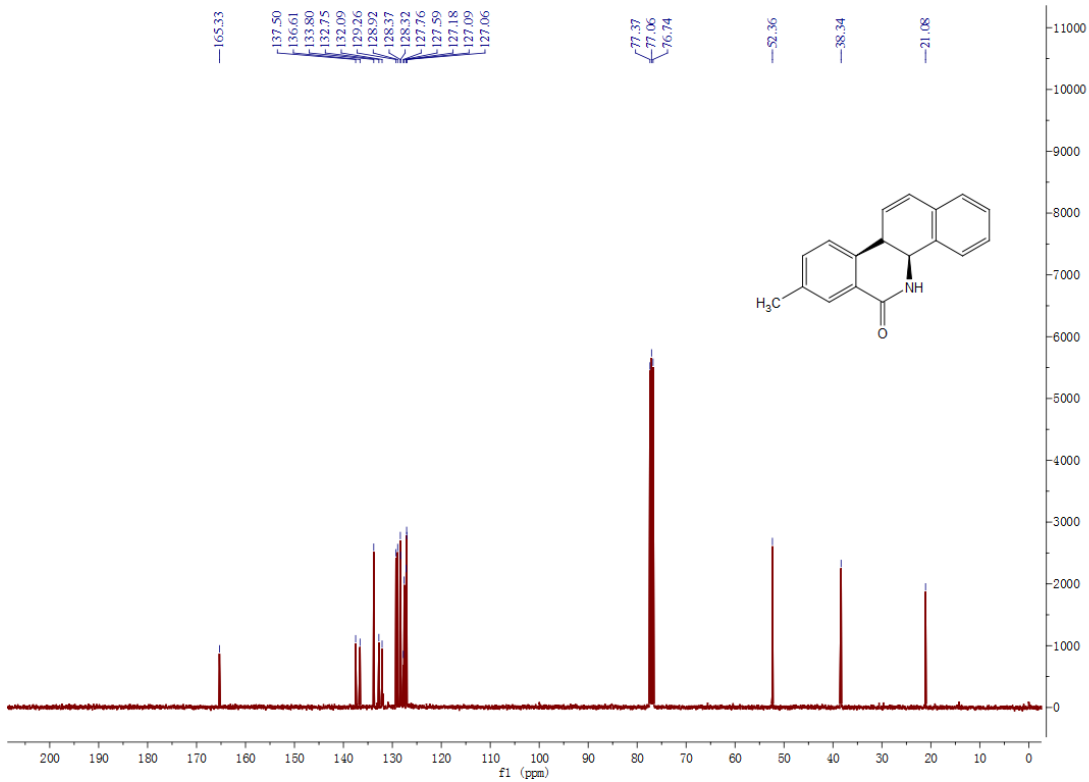

3ai

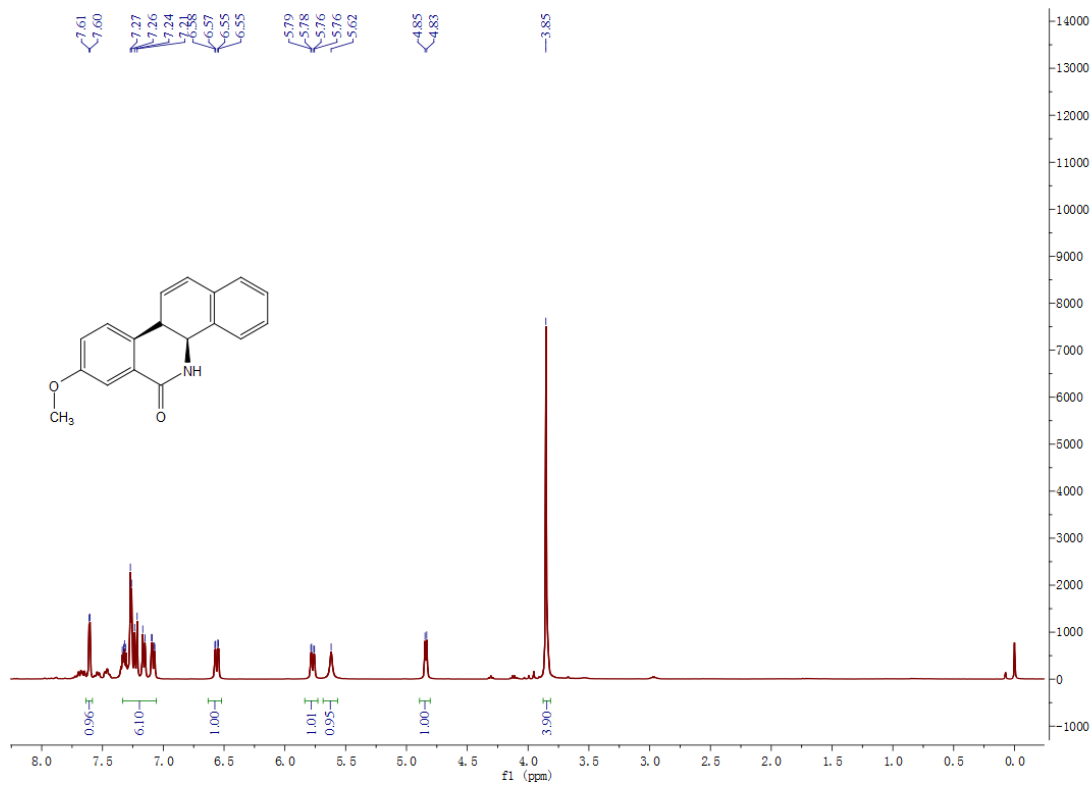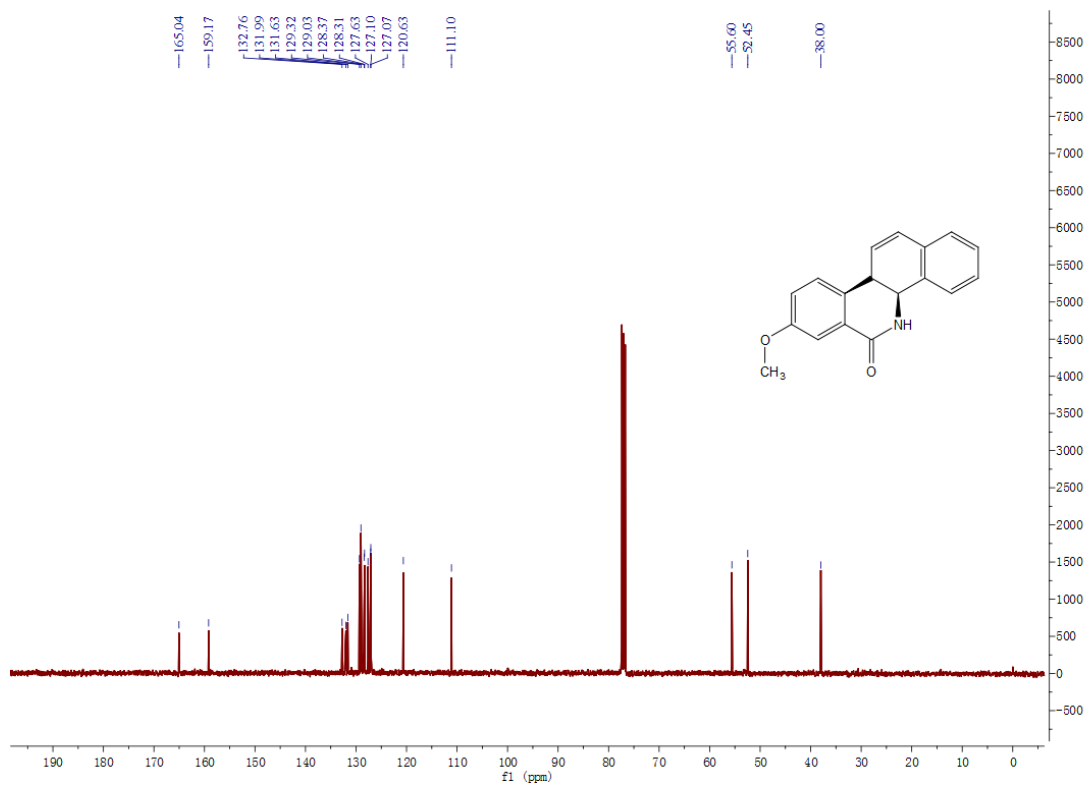

3aj

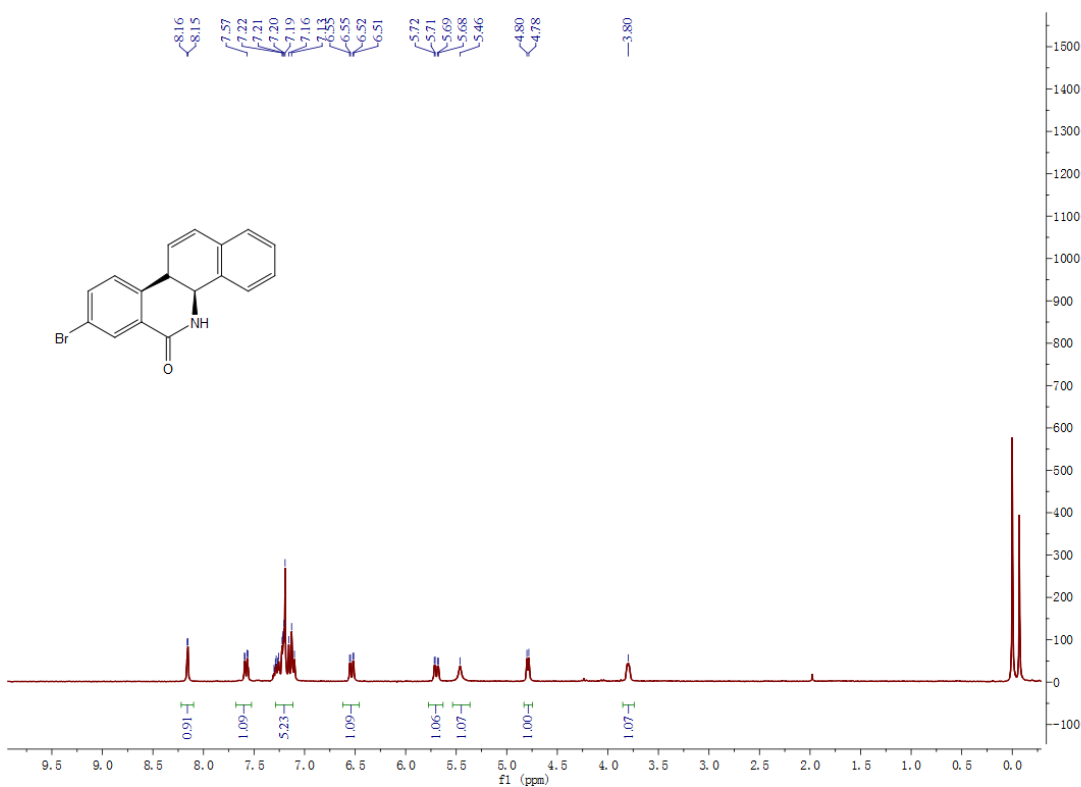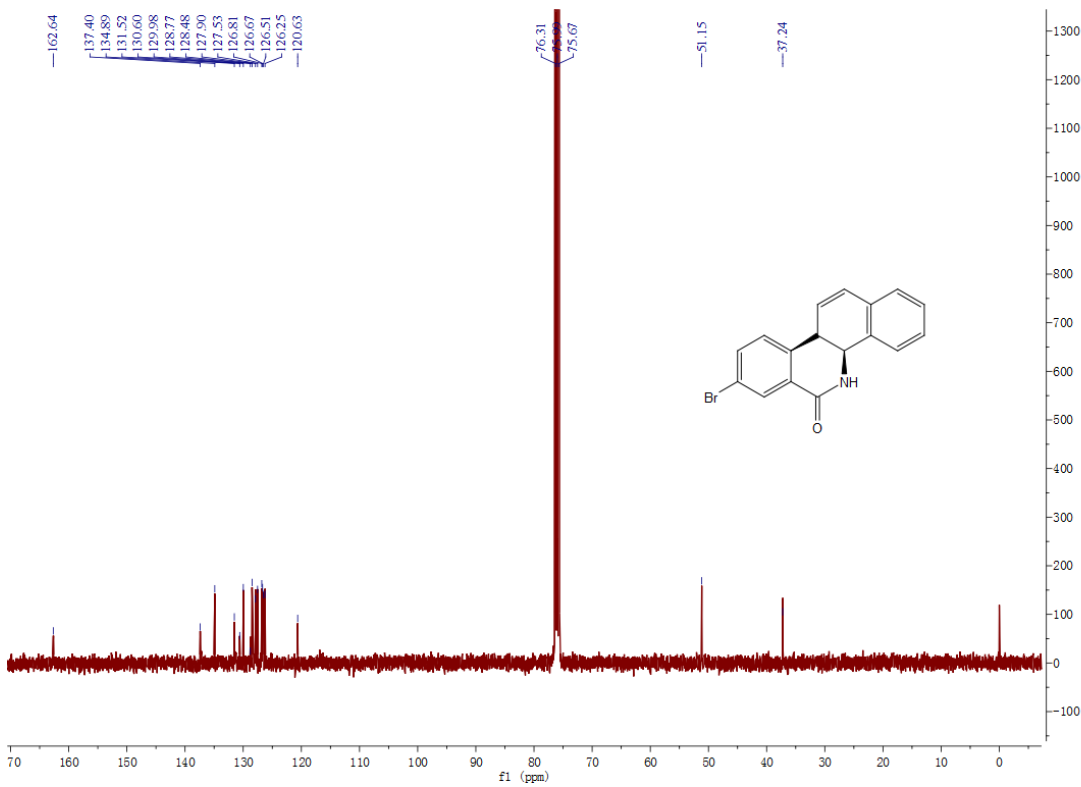

3ak

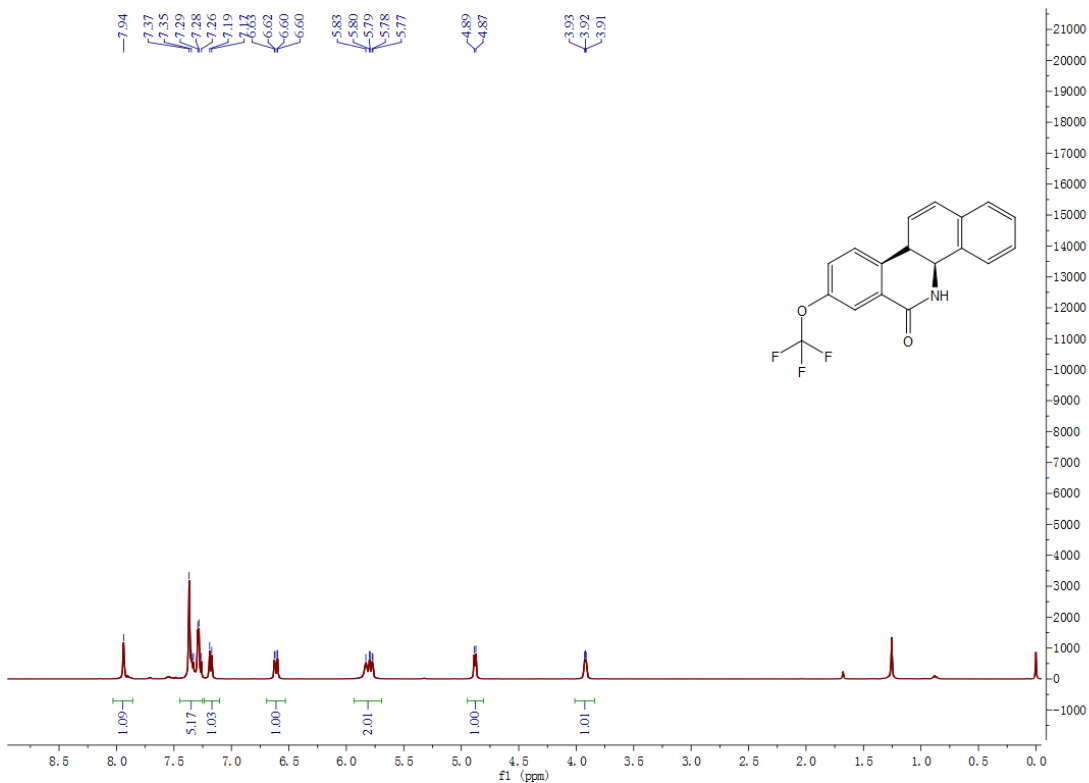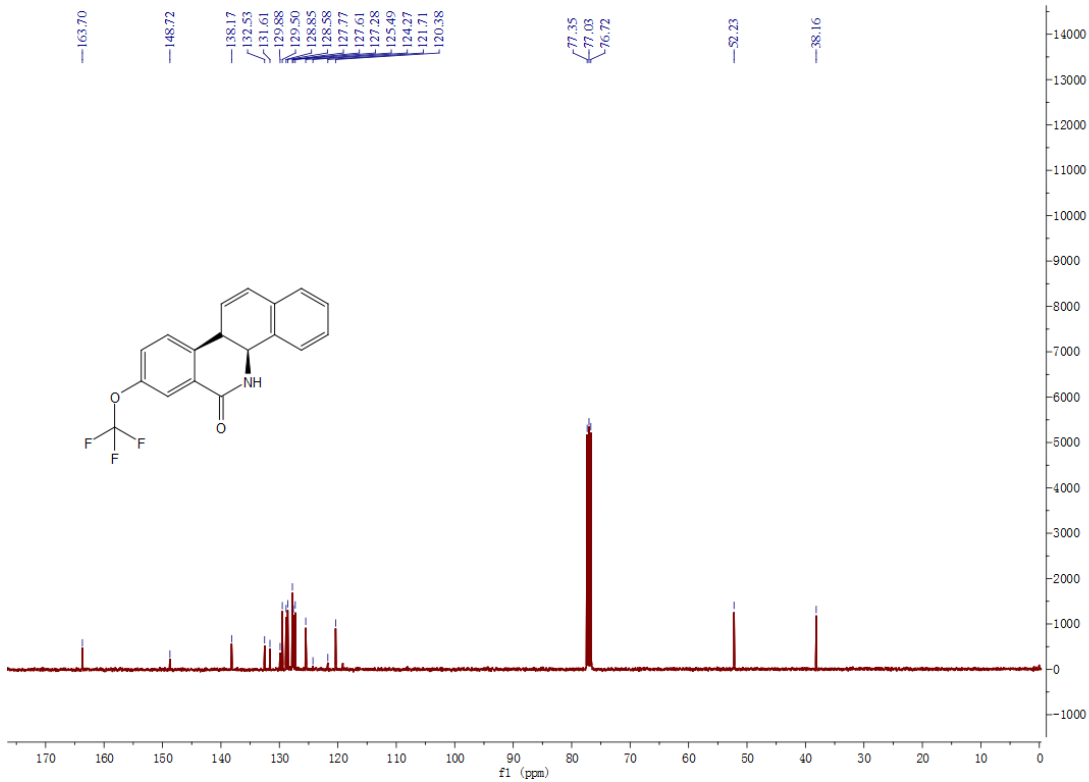

3al

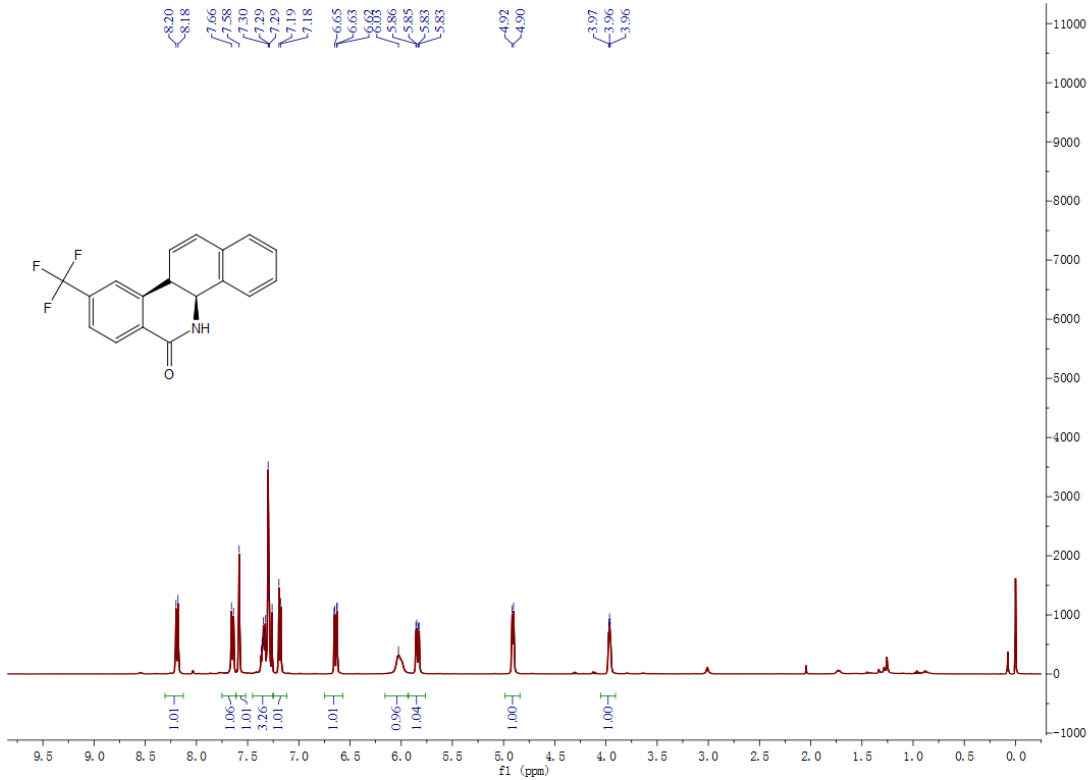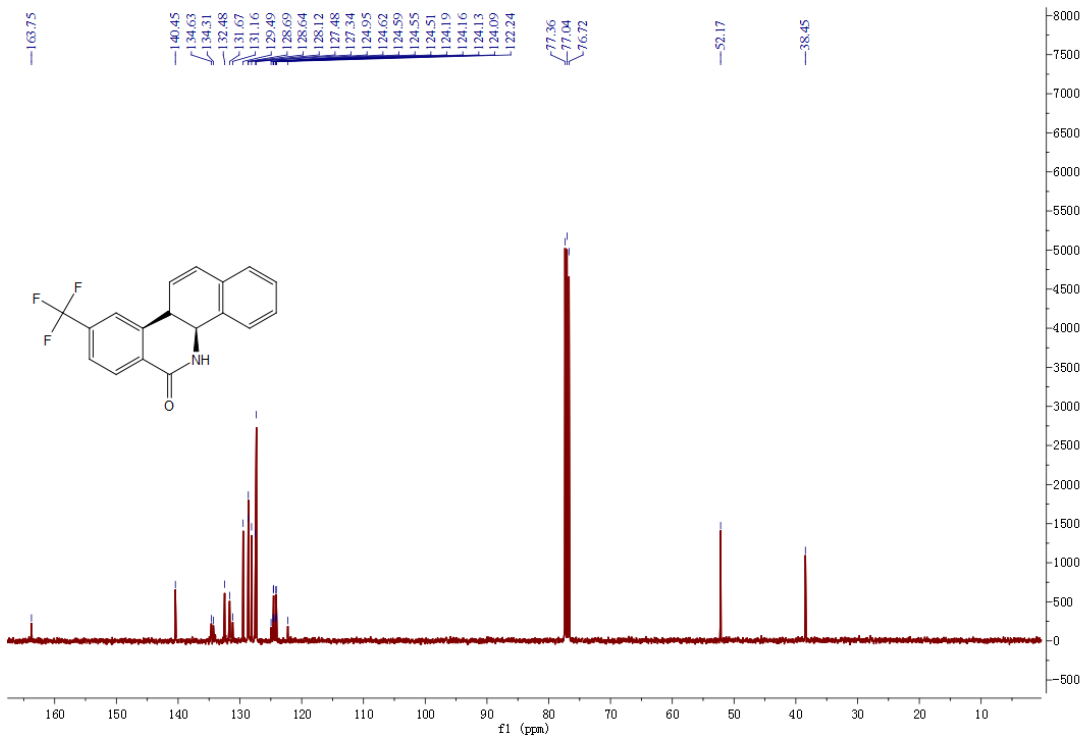



3am

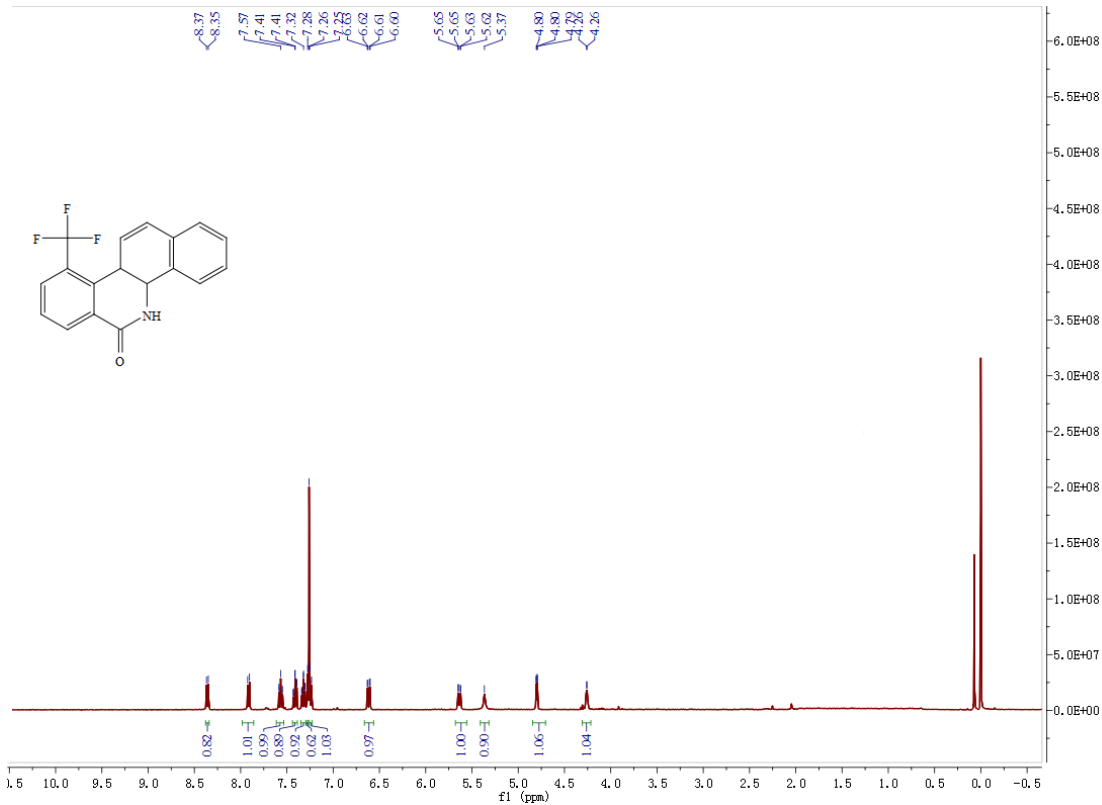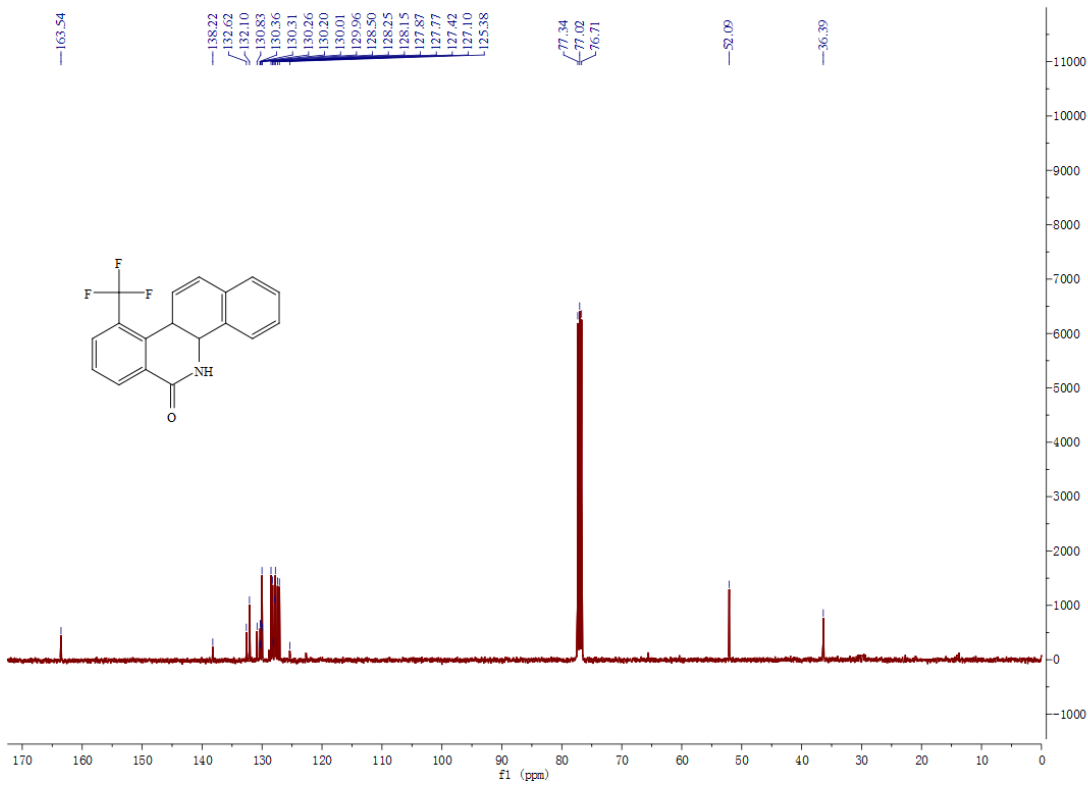

3an

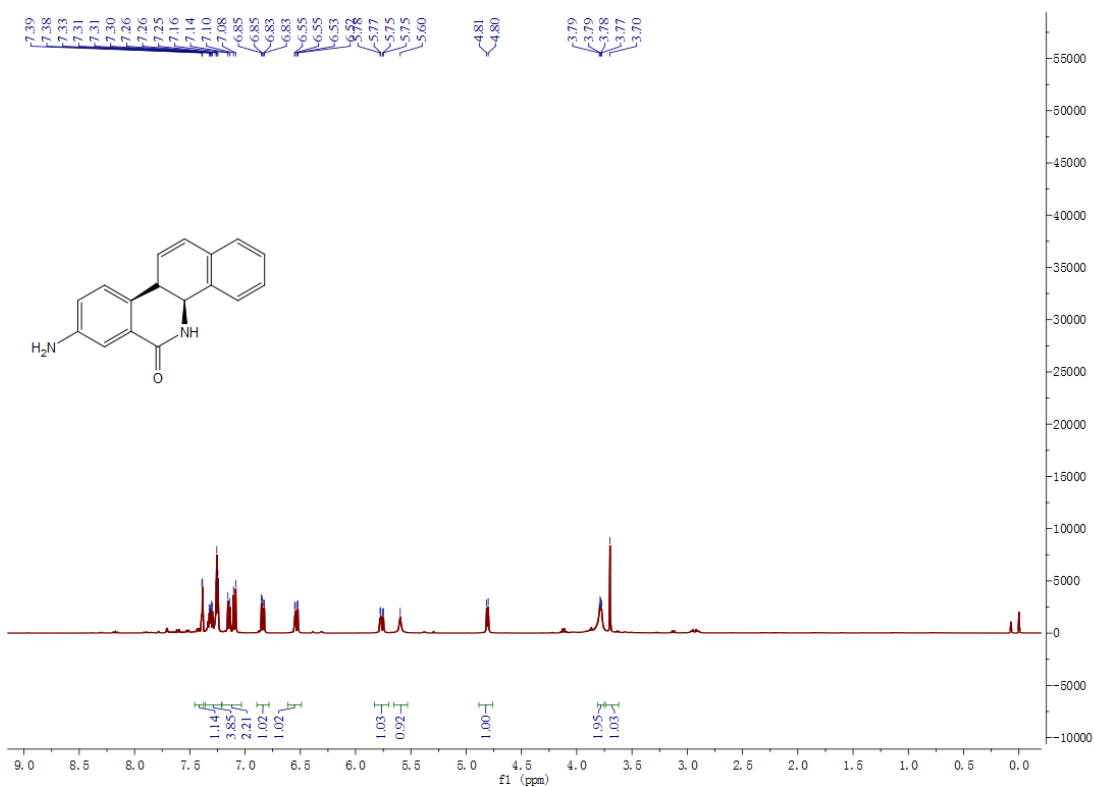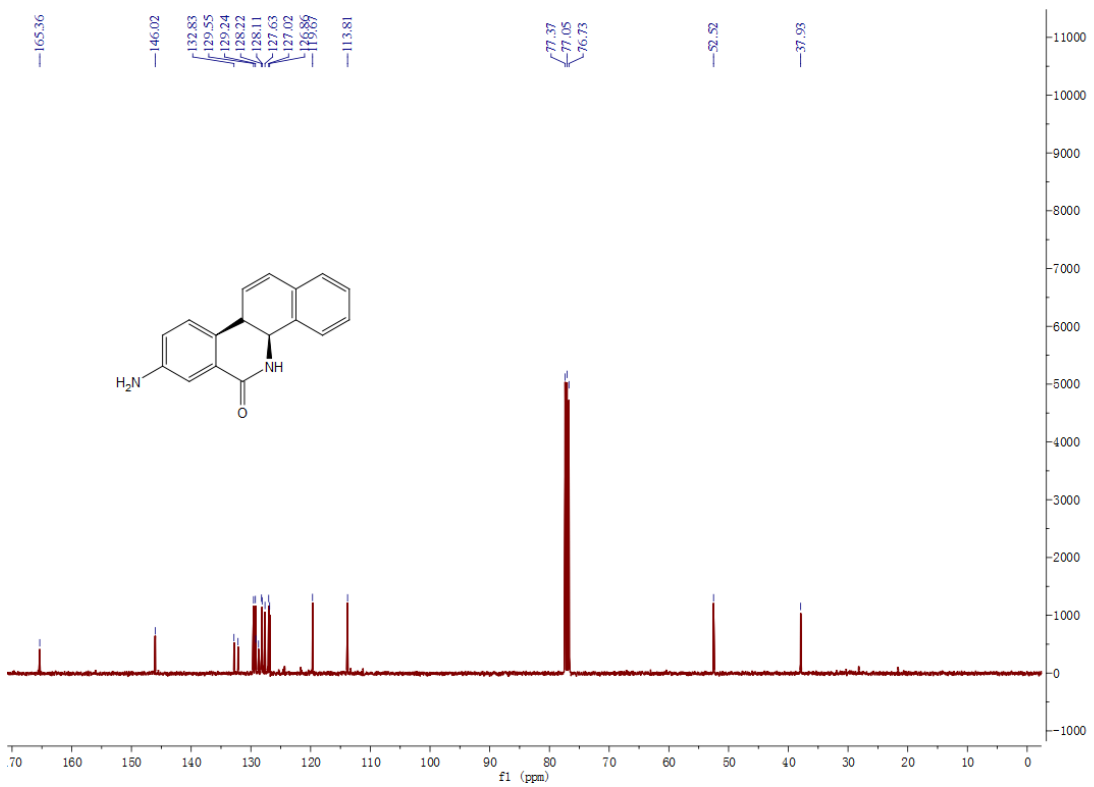

3ao

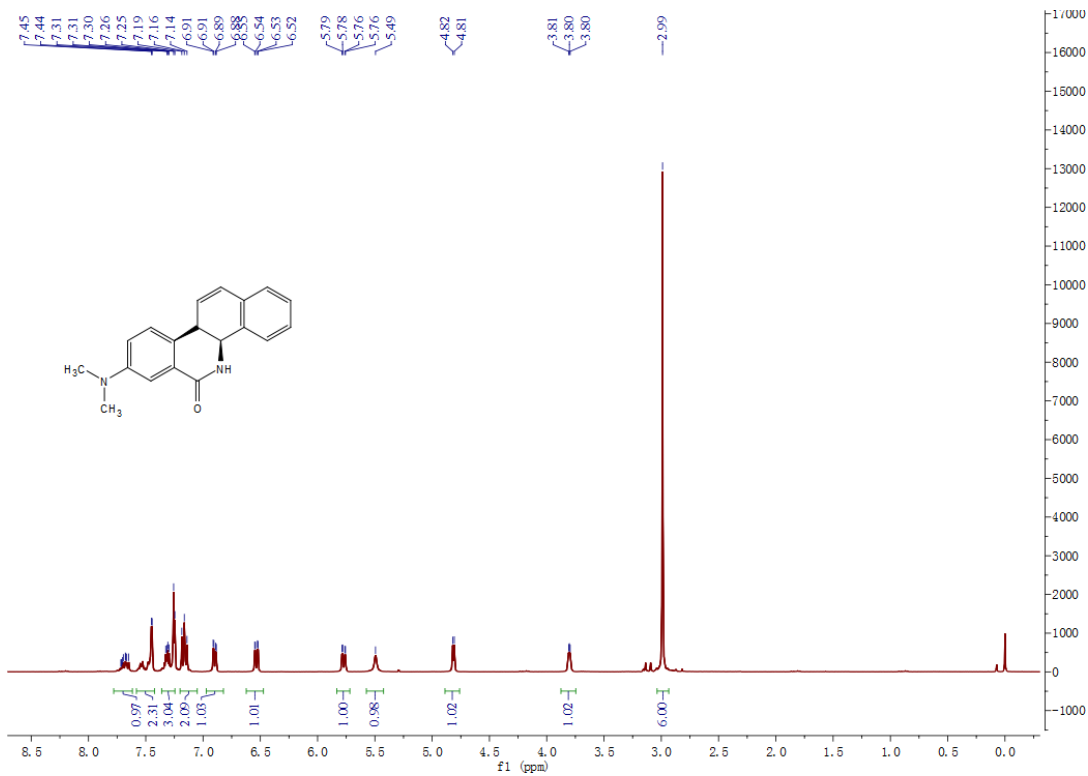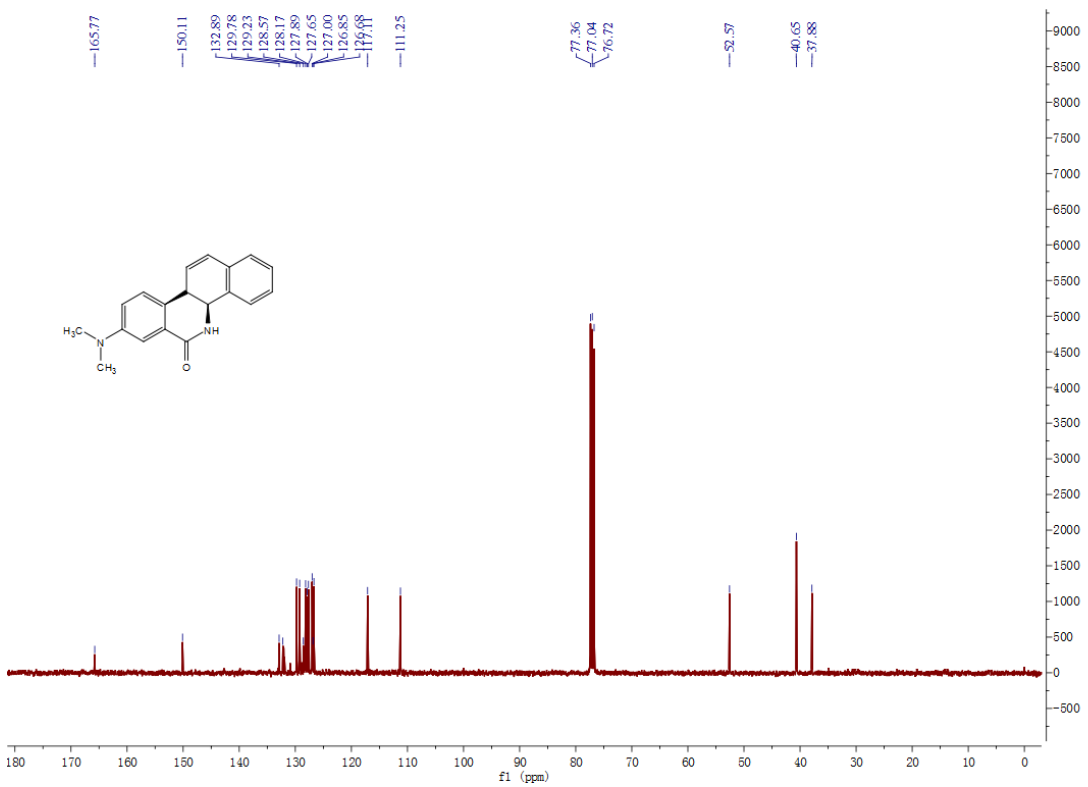

3ap

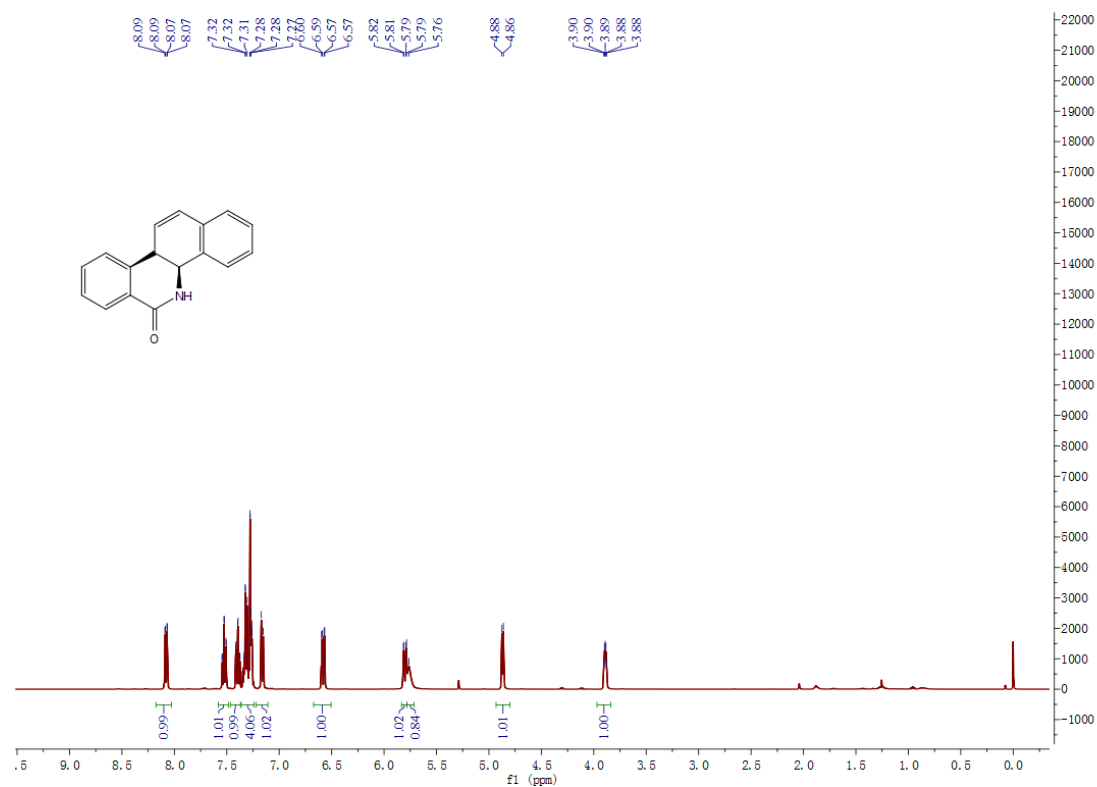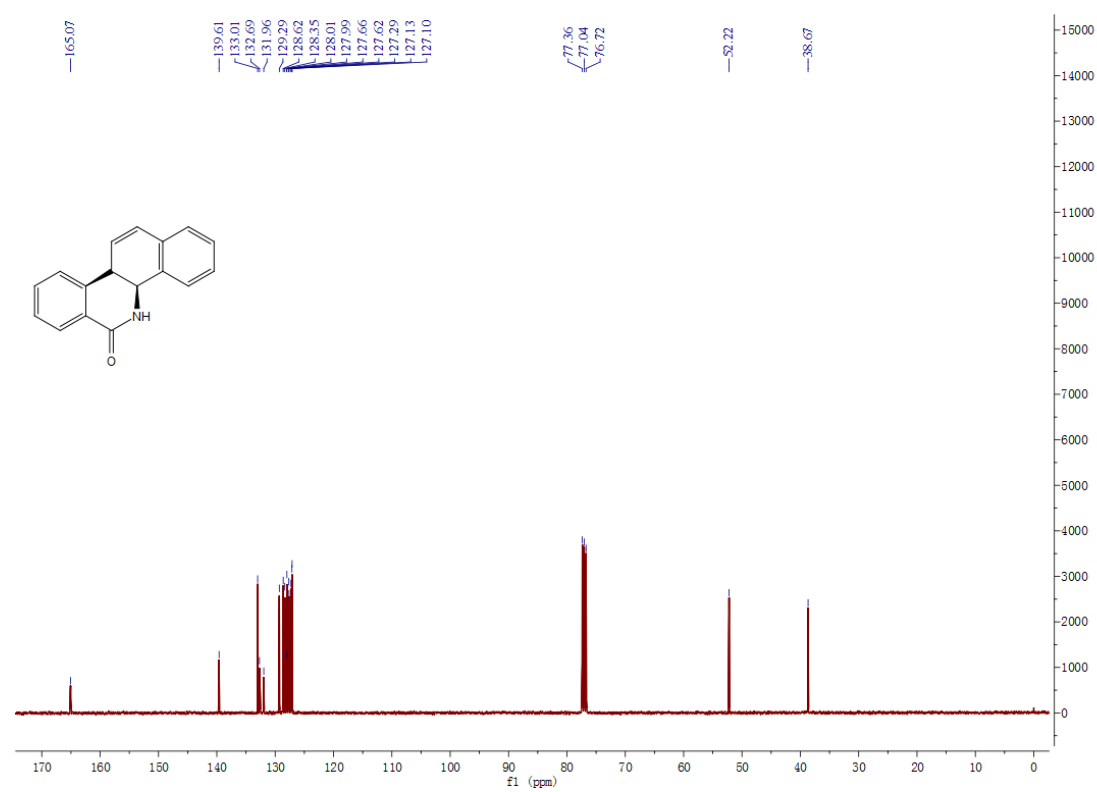

3ax

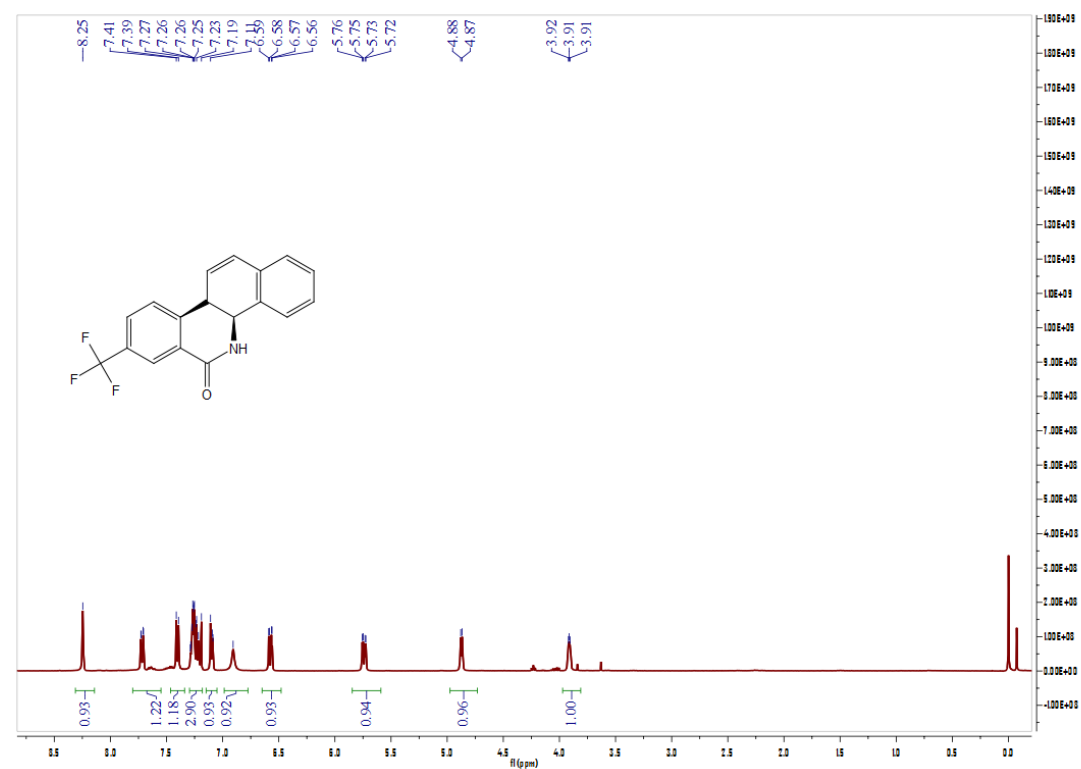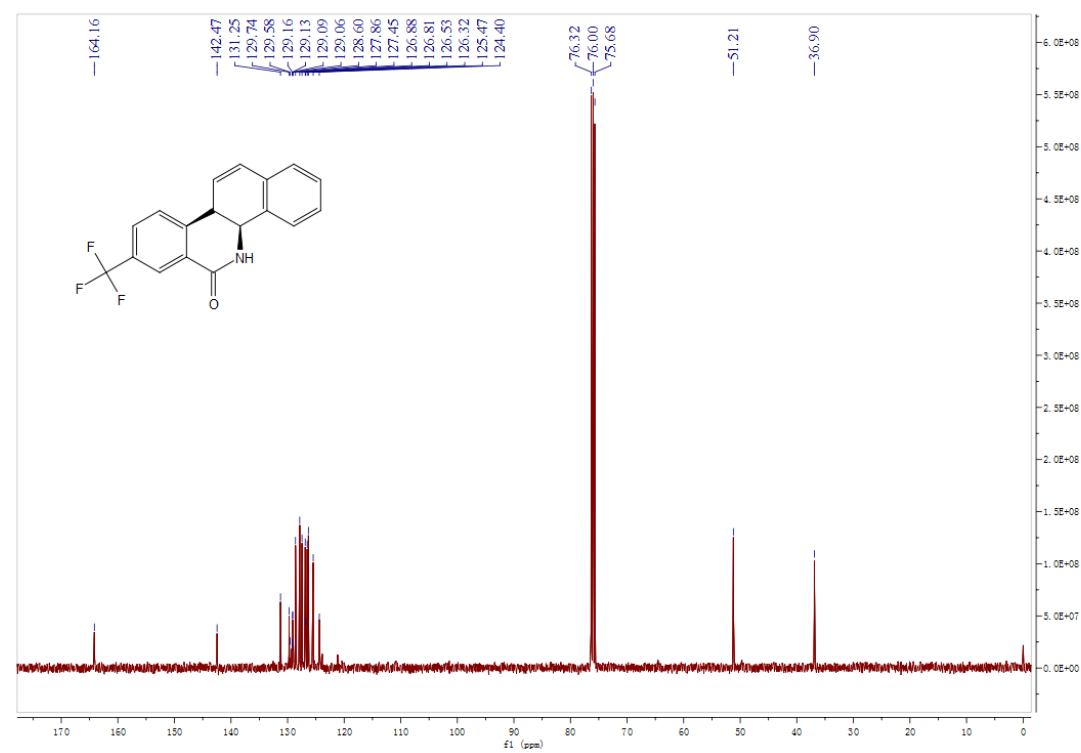

3ay

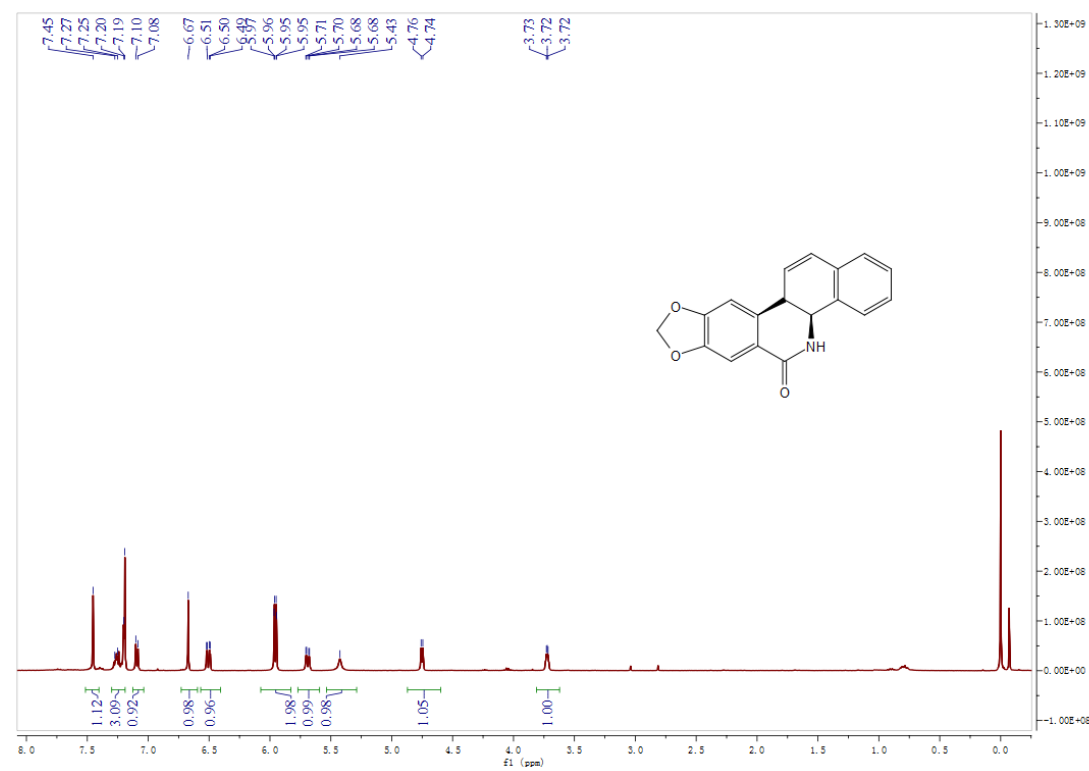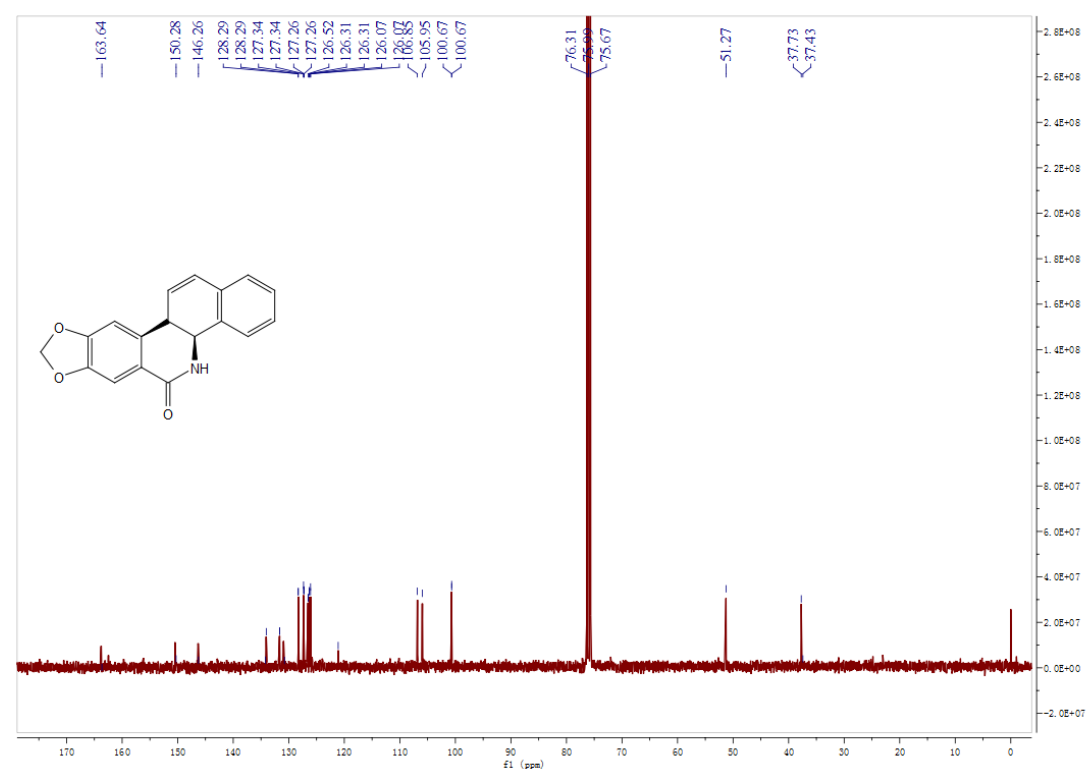

3az

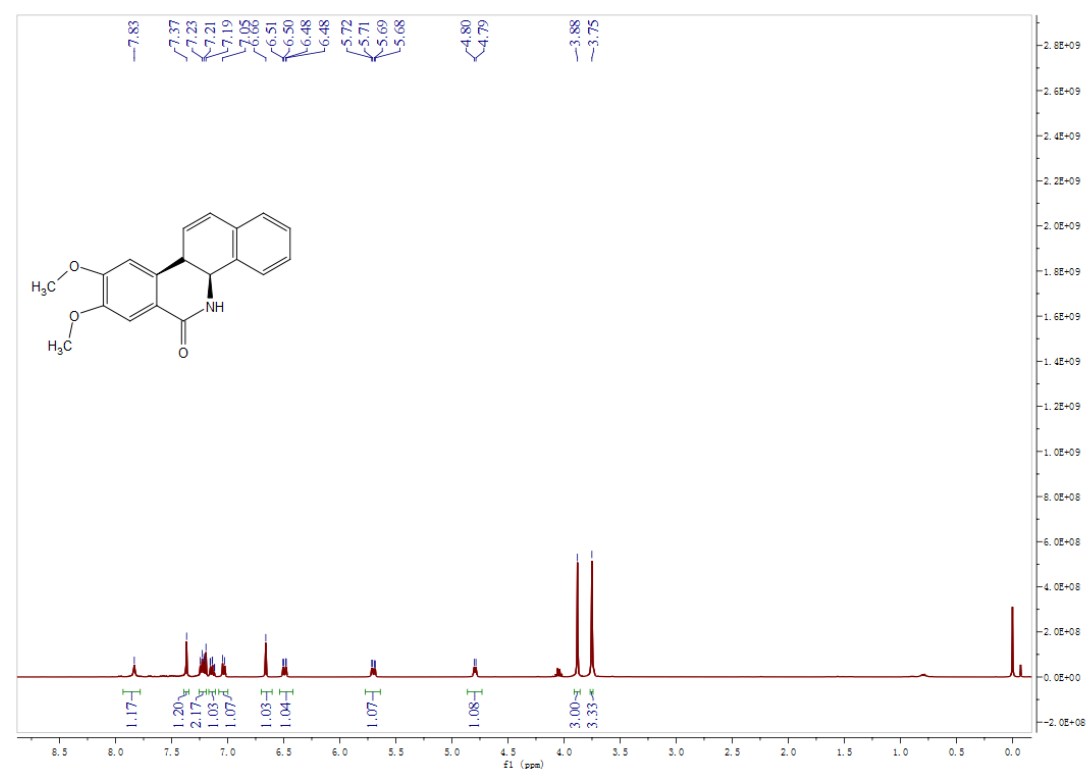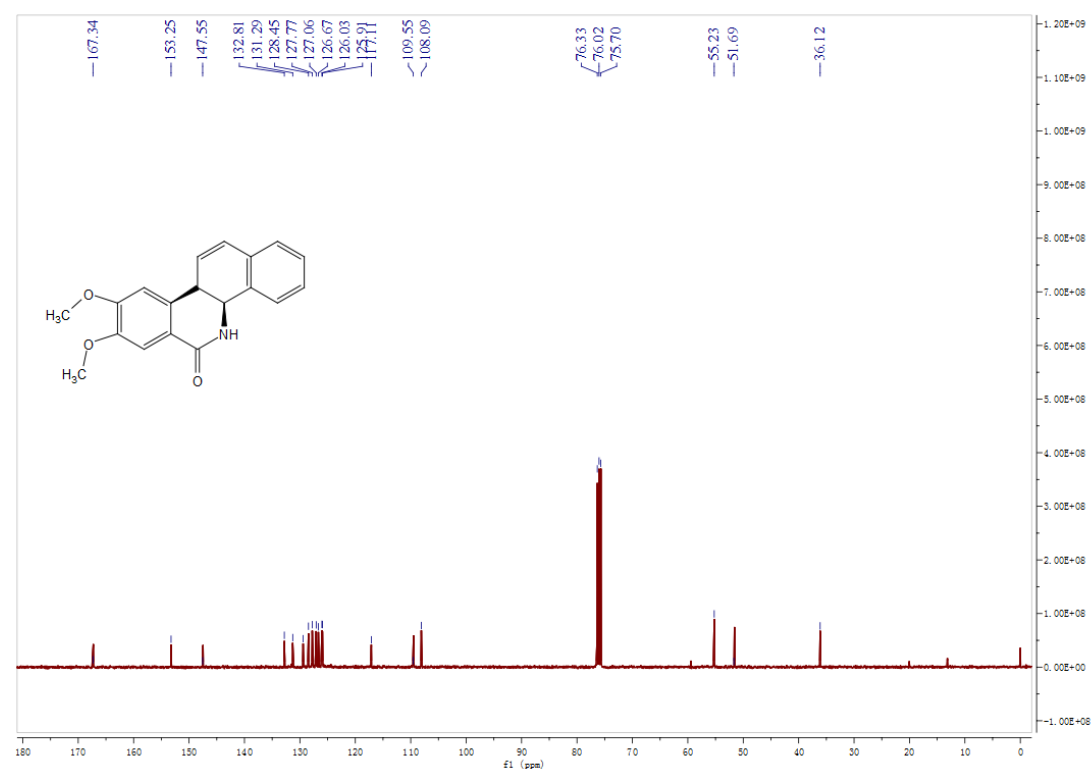

3ba

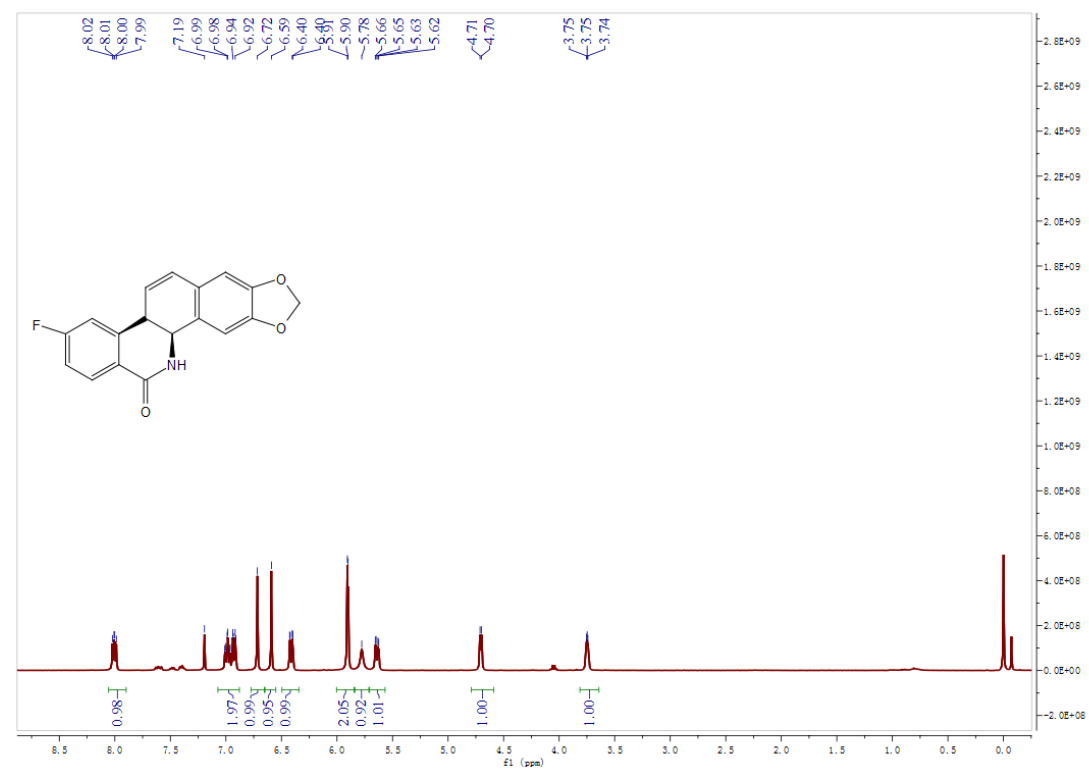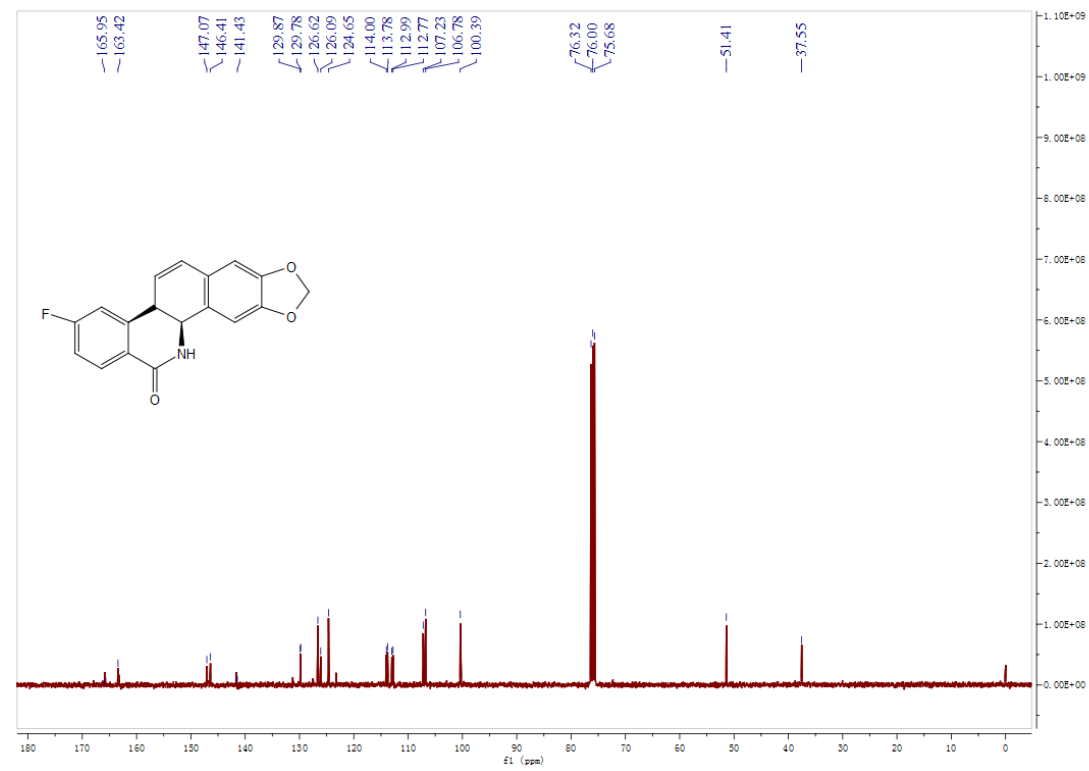



3bc

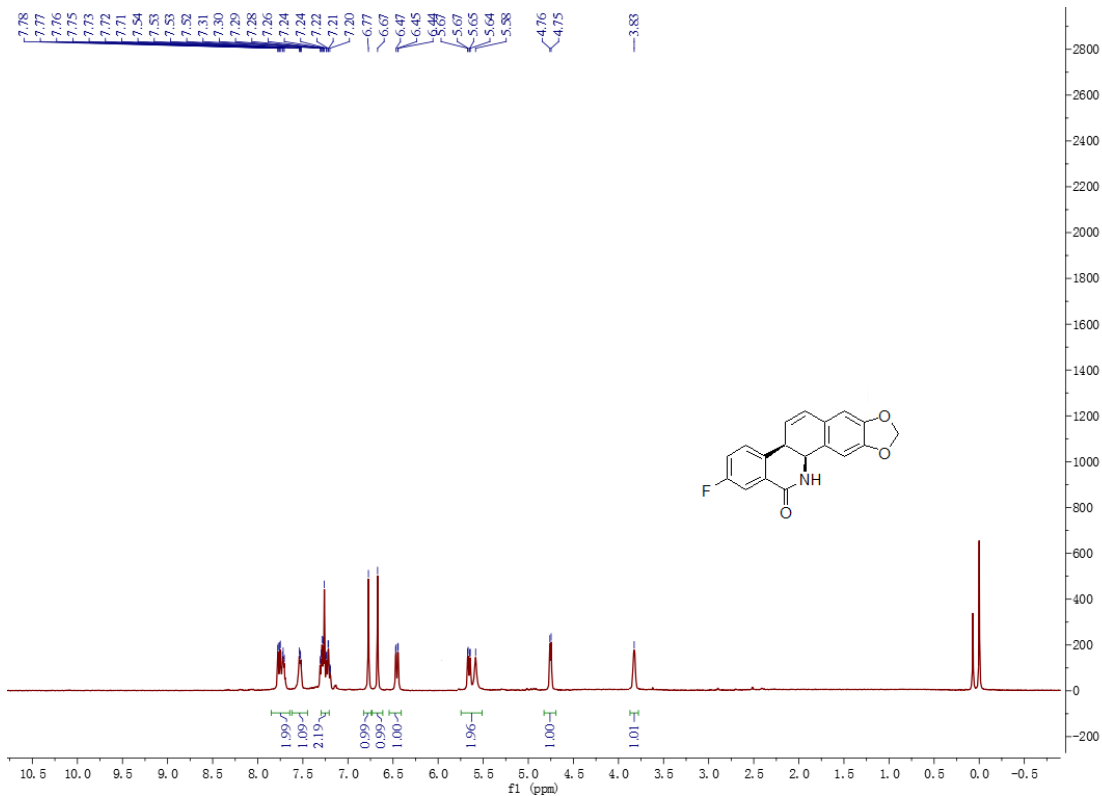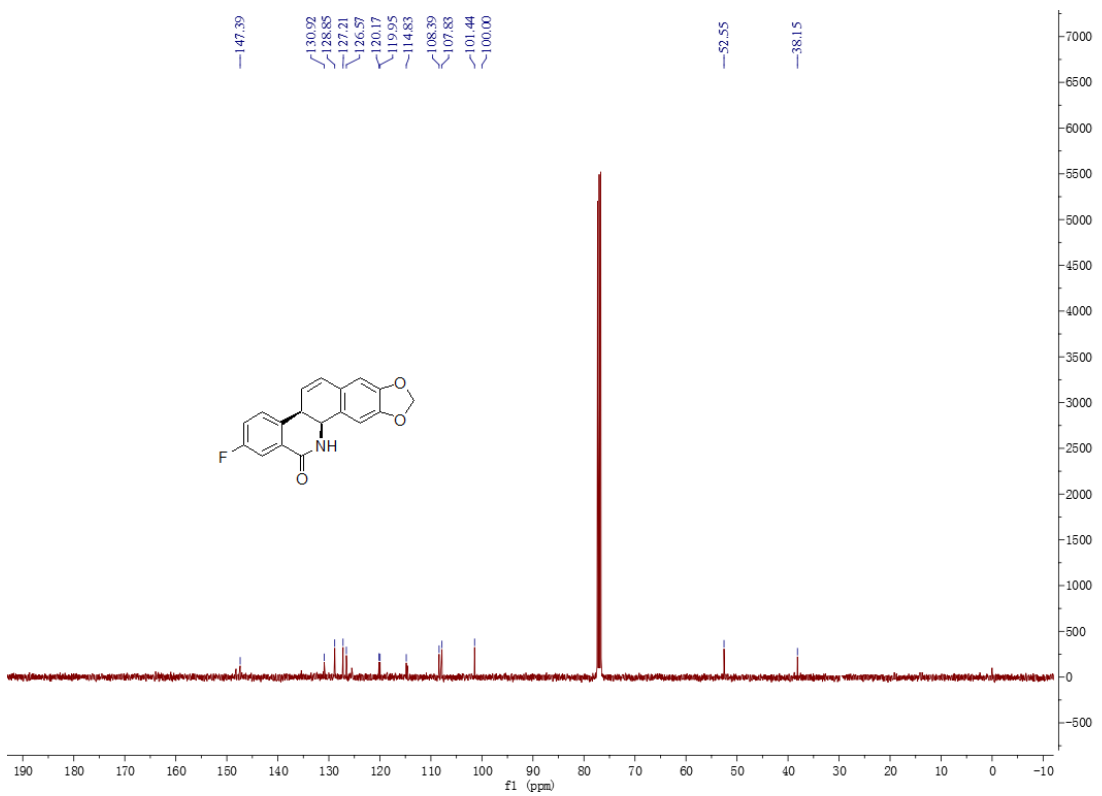

3bd

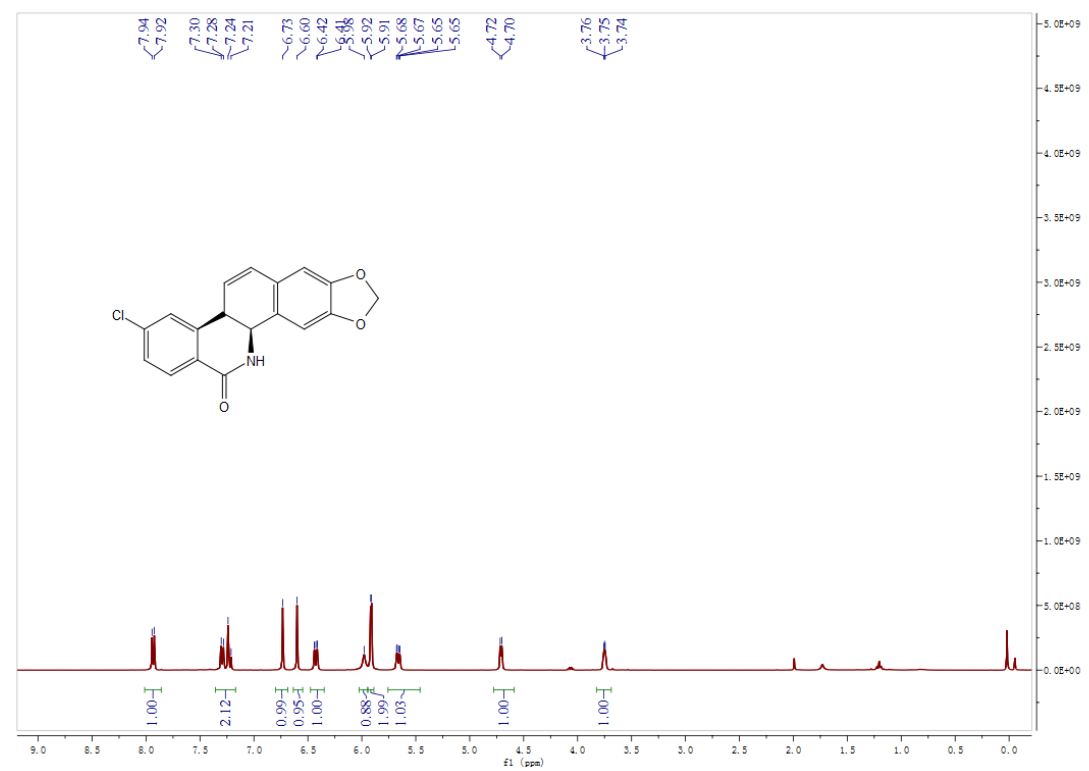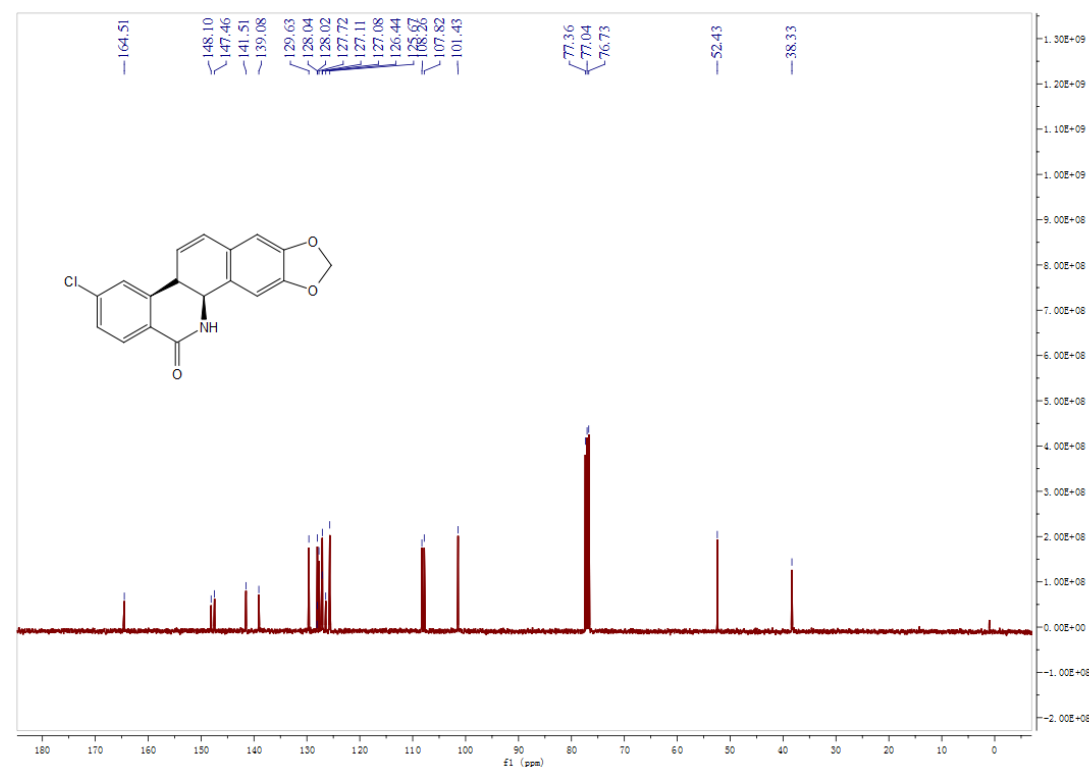

3bi

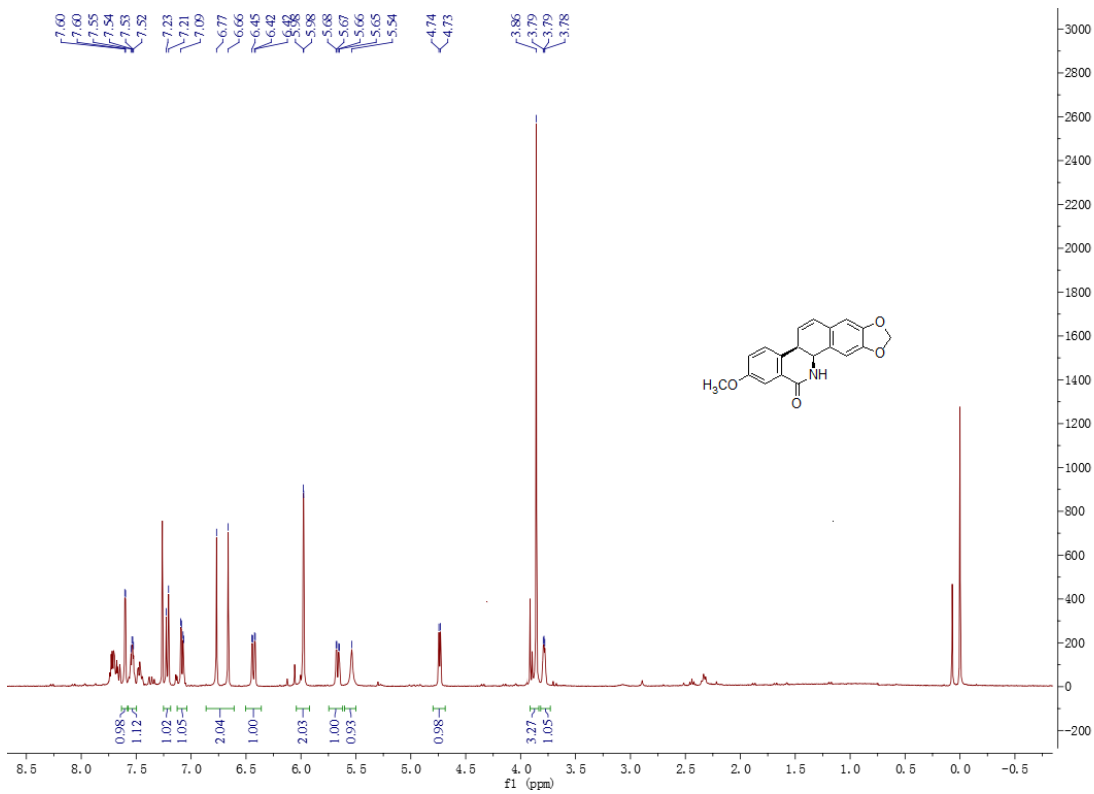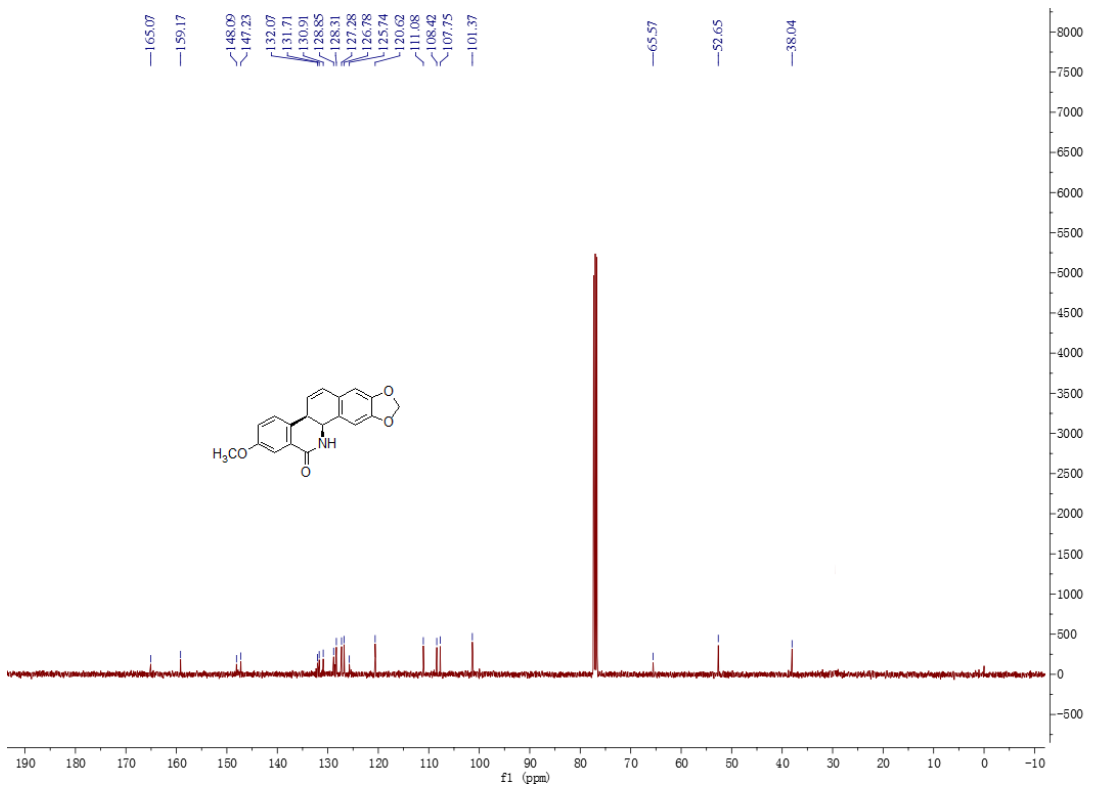

3bk

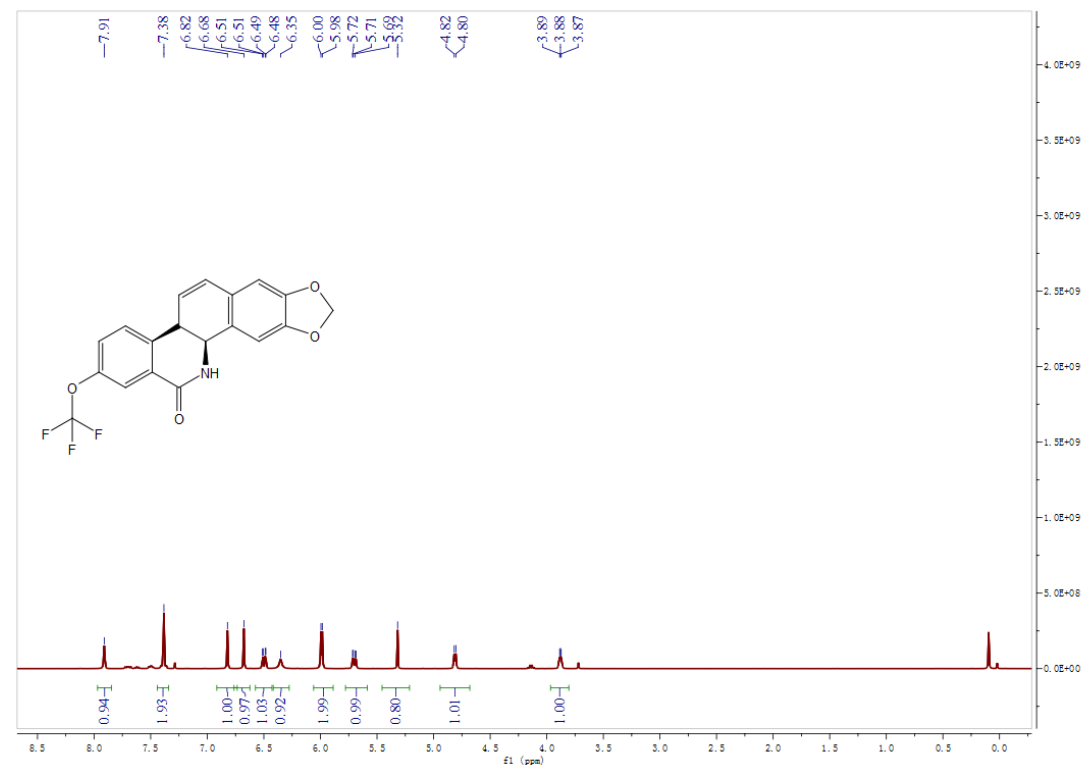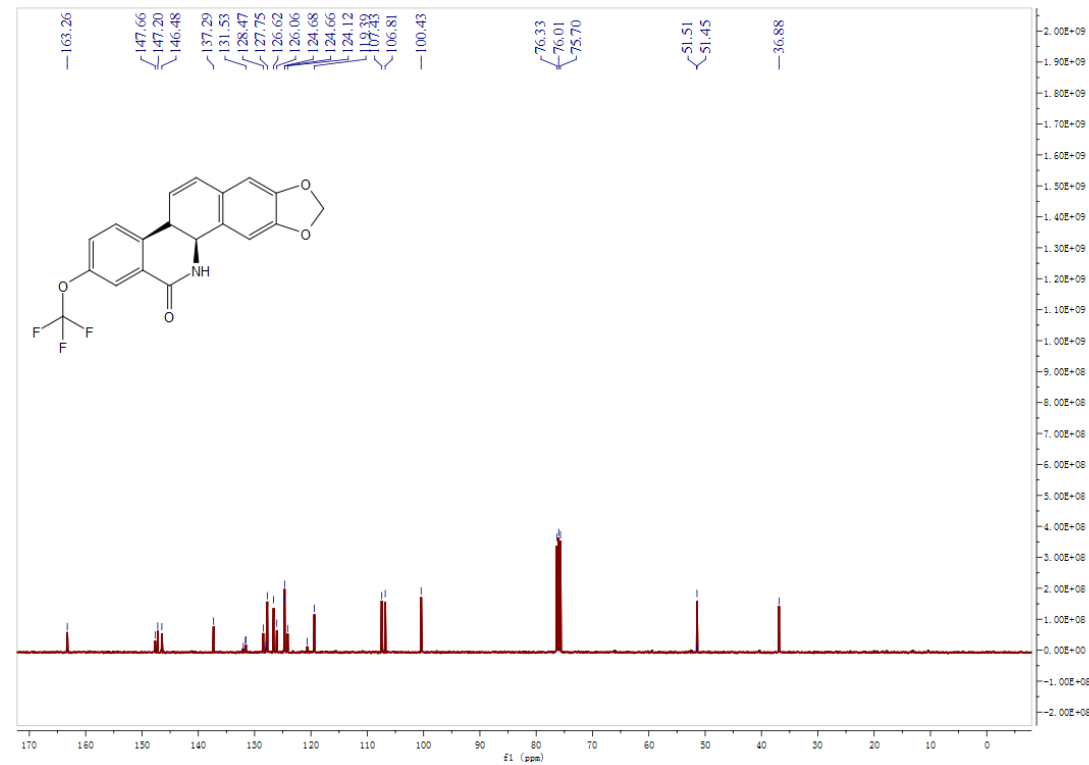

3bx

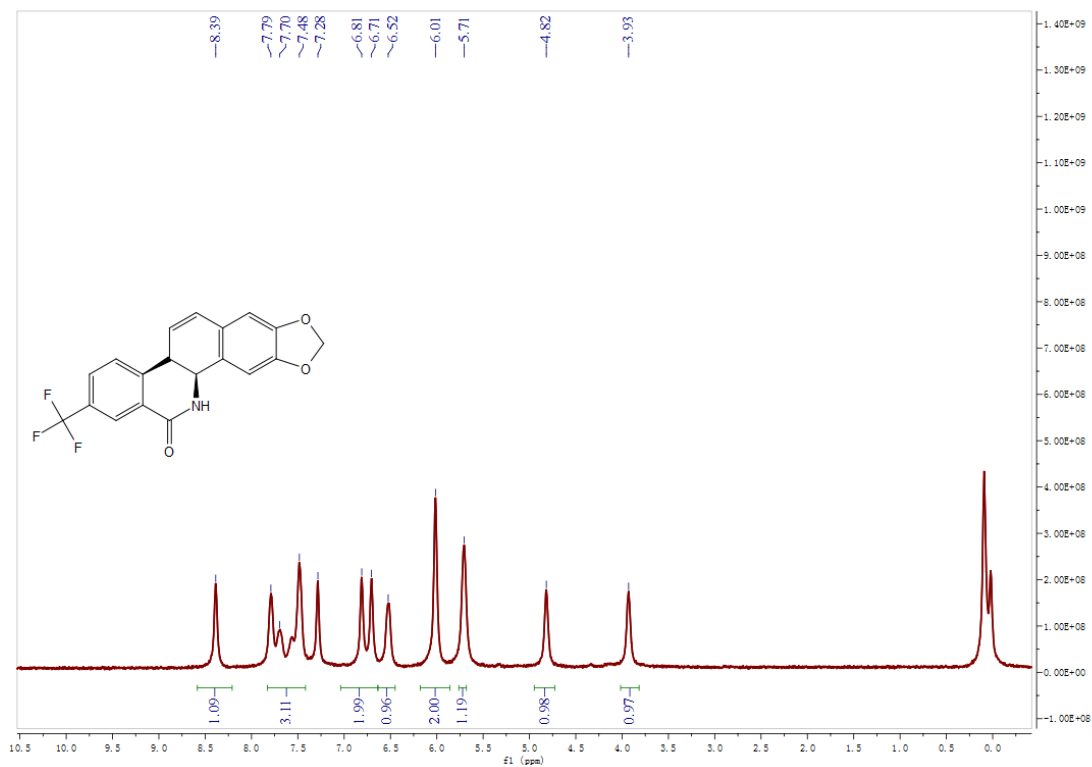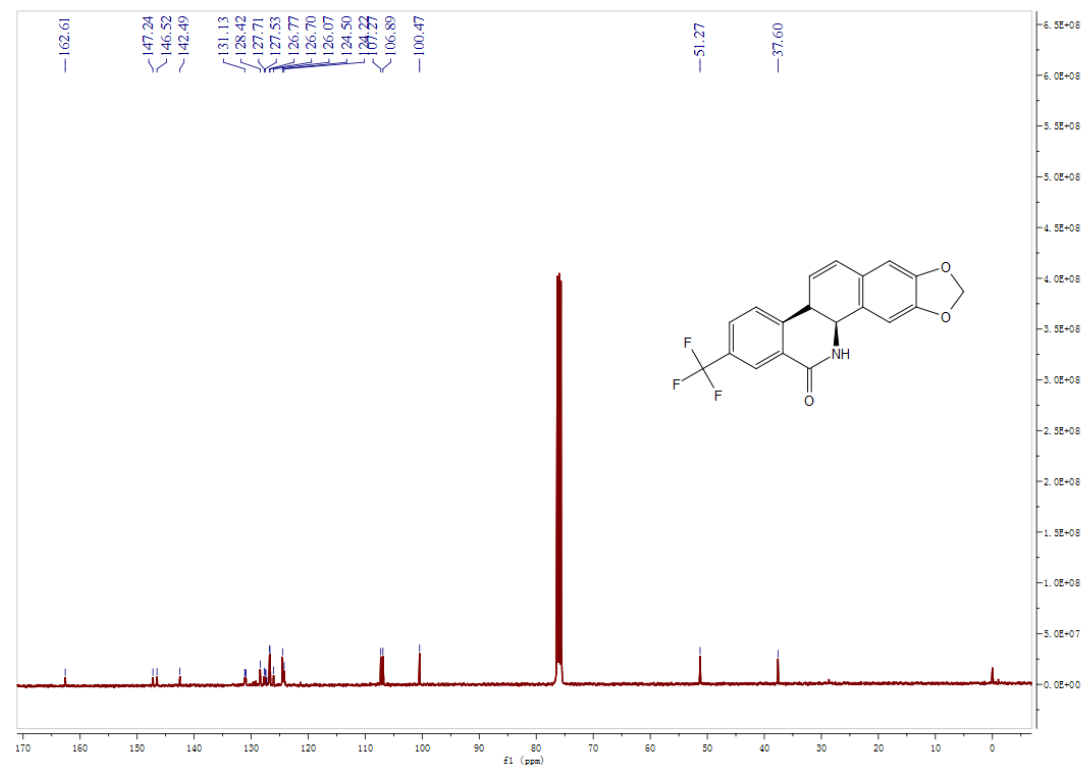

3ca

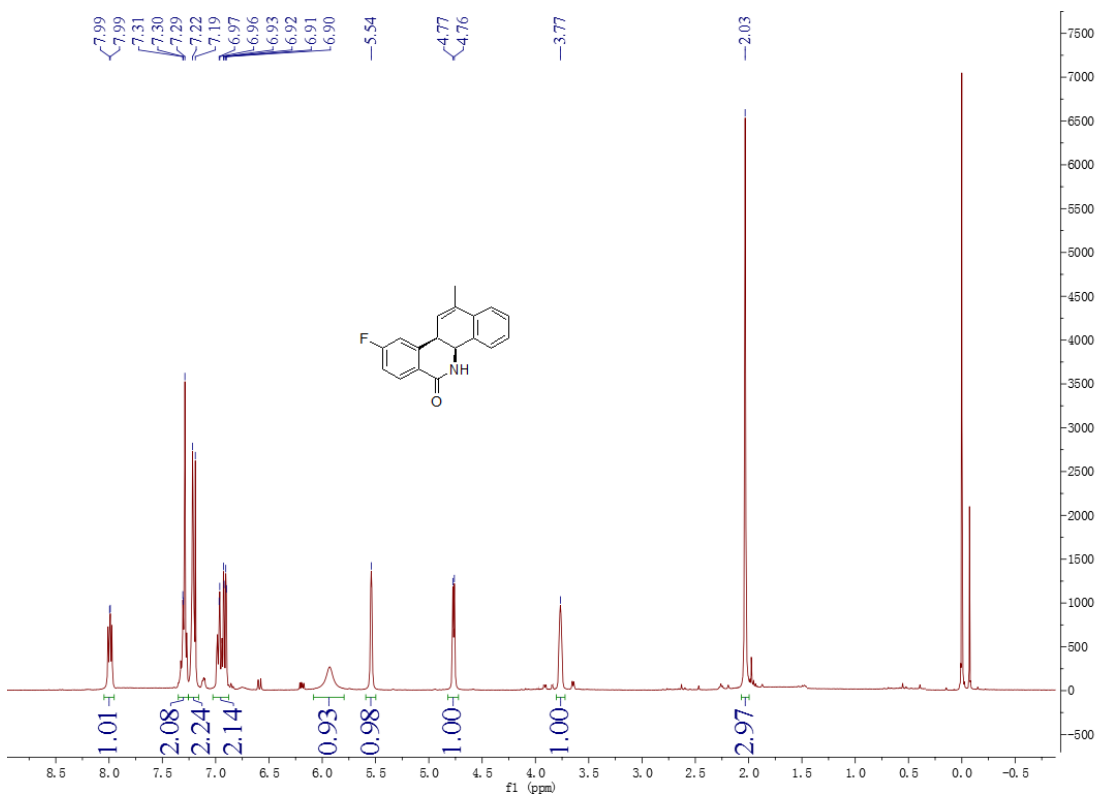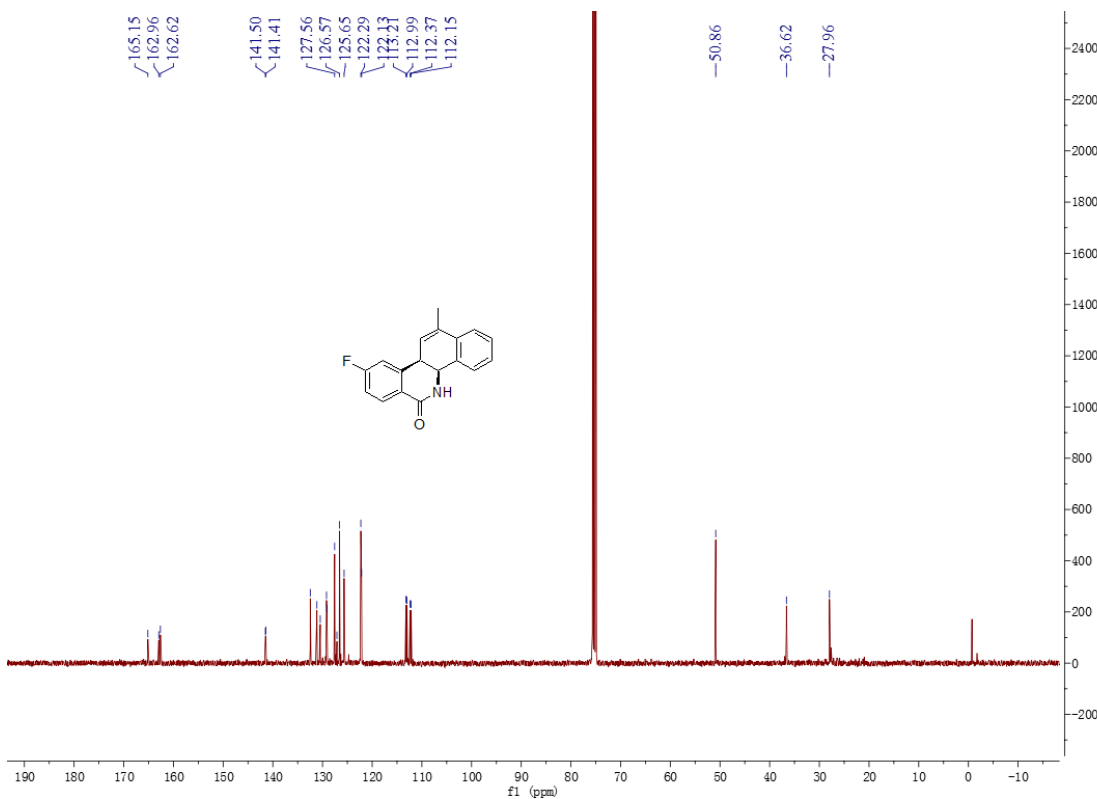

3cp

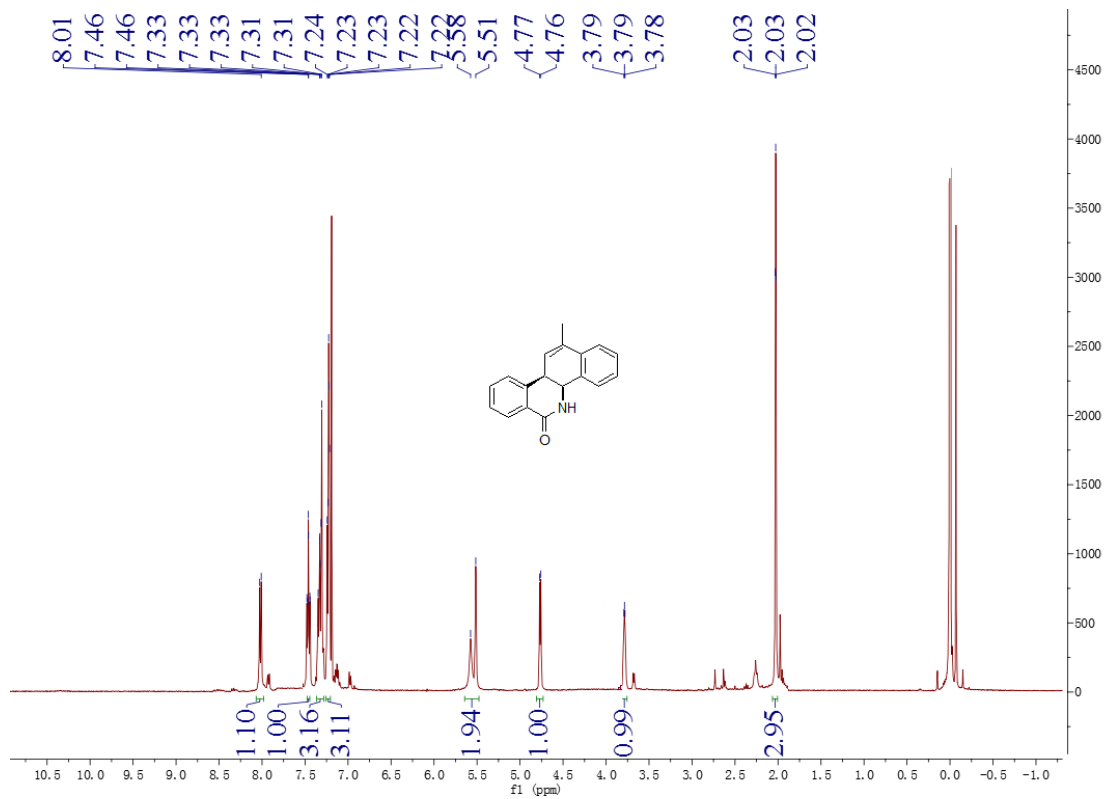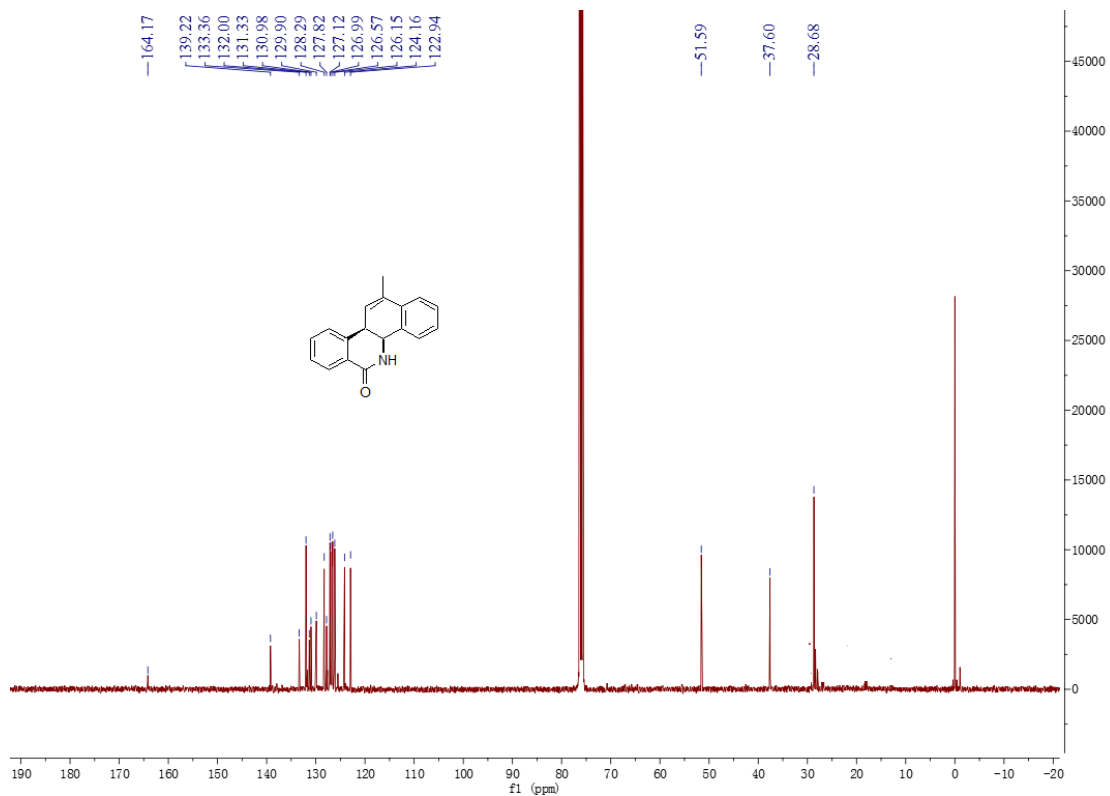

Supplement: c3ra42474j.pdf [file c3ra42474j.pdf]
